# Supplementary material for: Dyes for guest–host liquid crystal applications: a general approach to the rapid computational assessment of useful molecular designs
Source: Royal Society of Chemistry journal article supplement (doi:10.1039/d3cp00178d), 2023-01-01
Supplement: d3cp00178d1.pdf [file d3cp00178d1.pdf]

## Supporting Information

### **Dyes for Guest-Host Liquid Crystal Applications: a General Approach to the Rapid Assessment of Useful Molecular Designs**

Mark T. Sims,<sup>†</sup> Laurence C. Abbott, Richard J. Mandle,<sup>‡</sup> John W. Goodby and John N. Moore\*

Department of Chemistry, University of York, York YO10 5DD, UK

\*Email: john.moore@york.ac.uk

<sup>†</sup> Current address: Department of Applied Sciences, Faculty of Health and Life Sciences, Northumbria University, Newcastle Upon Tyne, NE1 8ST, UK

<sup>‡</sup> Current address: School of Physics and Astronomy, University of Leeds, Leeds, LS2 9JT, UK

#### **Table of Contents**

1. Synthesis of dye **11**
2. Polarized UV-visible absorption spectra of dyes in 5CB
3. Optimised dye structures
4. Conformation energies, quadrupole tensors, surface tensors and visible transitions of dyes
5. Calculated structure, quadrupole tensor and surface tensor of 5CB
6. Calculated dichroic order parameters using a range of scaling factors for  $F_{ZZ}$

## 1. Synthesis of dye 11

Miscellaneous solvents were purchased from Fisher Scientific and dried by sequential percolation through columns of activated alumina and copper Q5 catalyst prior to use. 1,4-Dihydroxyanthraquinone and DMAP were purchased from SigmaAldrich, *trans* 4-ethylcyclohexanecarboxylic acid was purchased from Synthon GMBH, EDC.HCl was purchased from Fluorochem. Reactions were monitored by thin layer chromatography (TLC) using an appropriate solvent system. Silica coated aluminium TLC plates used were purchased from Merck (Kieselgel 60 F-254) and visualised using, separately, visible and UV (254 nm) light. Column chromatography was performed using flash grade silica from Fluorochem (40 - 63 $\mu$ m particle size). Proton NMR spectra were recorded on a JEOL ECS spectrometer operating at 400 MHz ( $^1\text{H}$ ) as solutions in deuterated chloroform. Mass spectra were recorded on a Bruker micrOTOF MS-Agilent series 1200LC spectrometer, and we thank Mr. Karl Heaton of the University of York for acquiring MS data. FTIR spectroscopy was performed using a Shimadzu IR Prestige-21 spectrometer with a Specac Golden Gate diamond ATR IR insert. The ATR stage was flushed with dry nitrogen during use to eliminate peaks resulting from atmospheric water and CO<sub>2</sub>.

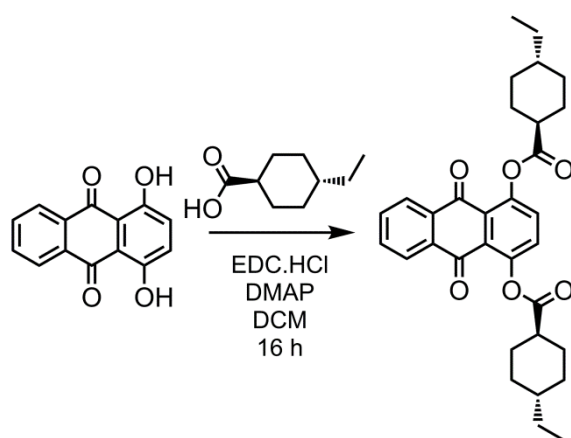

A suspension of 1,4-dihydroxyanthraquinone (1 g, 4.17 mmol), *trans* 4-ethylcyclohexanecarboxylic acid (1.56 g, 10 mmol), EDC.HCl (1.91 g, 10 mmol), and DMAP (50 mg) in DCM (25 ml) was stirred for 16 hours. The solvent was removed *in vacuo* and the crude material purified by flash chromatography over silica gel with DCM as the eluent. The chromatographed material was recrystallised from neat acetonitrile to afford the title compound as yellow needles. Yield: 1.42 g (66%). R<sub>f</sub> (TLC): 0.66 (DCM).  $^1\text{H}$  NMR (ppm): 0.91 (6H, t,  $J = 7.2$  Hz, Cy-CH<sub>2</sub>-CH<sub>3</sub>), 1.03 (4H, qd,  $J = 3.1$  Hz,  $J = 13.3$  Hz, CyH), 1.16-1.33 (6H, m, Cy-CH<sub>2</sub>-CH<sub>3</sub> + CyH), 1.64 (4H, qd,  $J = 3.1$  Hz,  $J = 13.3$  Hz, CyH), 1.88 – 1.98 (4H, m, CyH), 2.27 – 2.37 (4H, m, CyH), 2.69 (2H, tt,  $J = 3.1$  Hz,  $J = 13.3$  Hz, CyHCOOAr), 7.35 (2H, s, ArH), 7.68 – 7.76 (2H,

m, ArH), 8.10 – 8.17 (2H, m, ArH). FTIR ( $\text{cm}^{-1}$ ): 653, 719, 763, 800, 829, 842, 860, 889, 898, 912, 923, 941, 954, 989, 1014, 1047, 1080, 1103, 1163, 1192, 1222, 1253, 1317, 1375, 1406, 1446, 1512, 1585, 1593, 1668, 1724, 1745, 1759, 2852, 2926. MS (APCI): 517.259104 (calcd. for  $\text{C}_{32}\text{H}_{37}\text{O}_6$ : 517.258465, M + H, mean error -1.0 ppm), 534.285386 (calcd. for  $\text{C}_{32}\text{H}_{40}\text{NO}_6$ : 534.285014, M +  $\text{NH}_4$ , mean error -0.5 ppm).

$^1\text{H}$  NMR spectrum (400 MHz,  $\text{CDCl}_3$ ) of dye **11**:

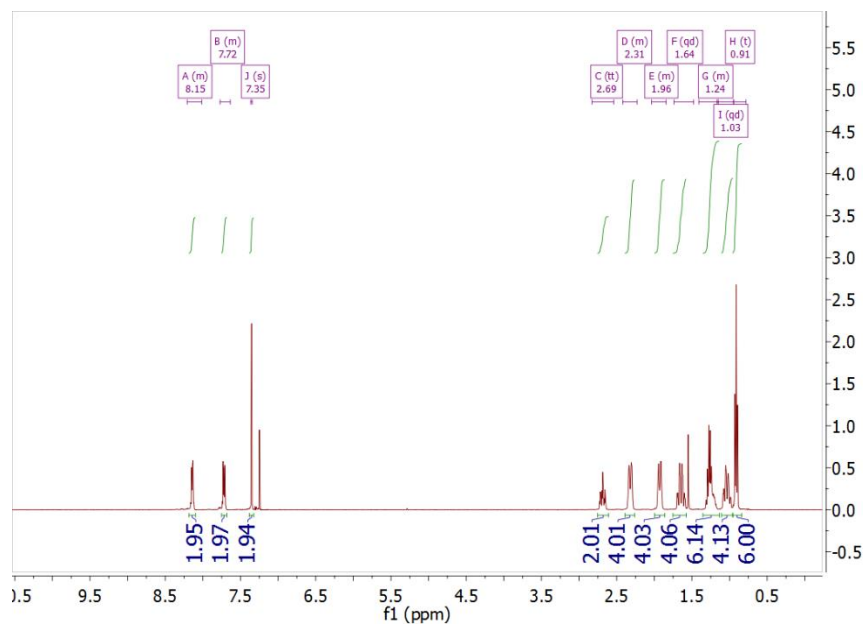

FT-IR spectrum of dye **11**:

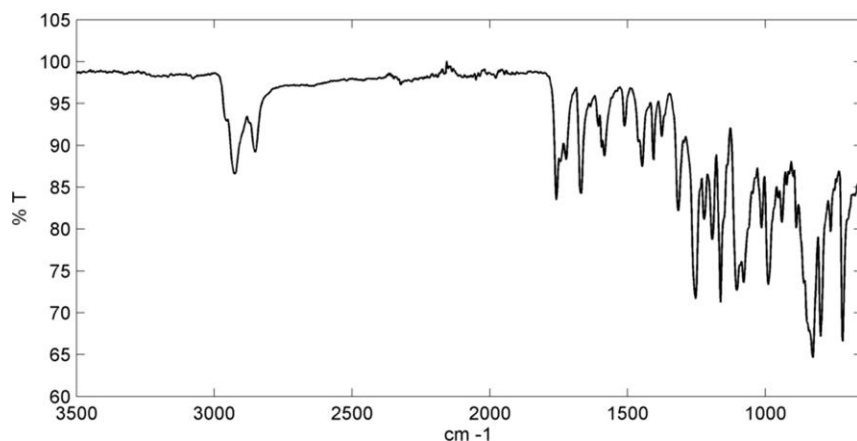

## 2. Polarized UV-visible absorption spectra of dyes in 5CB

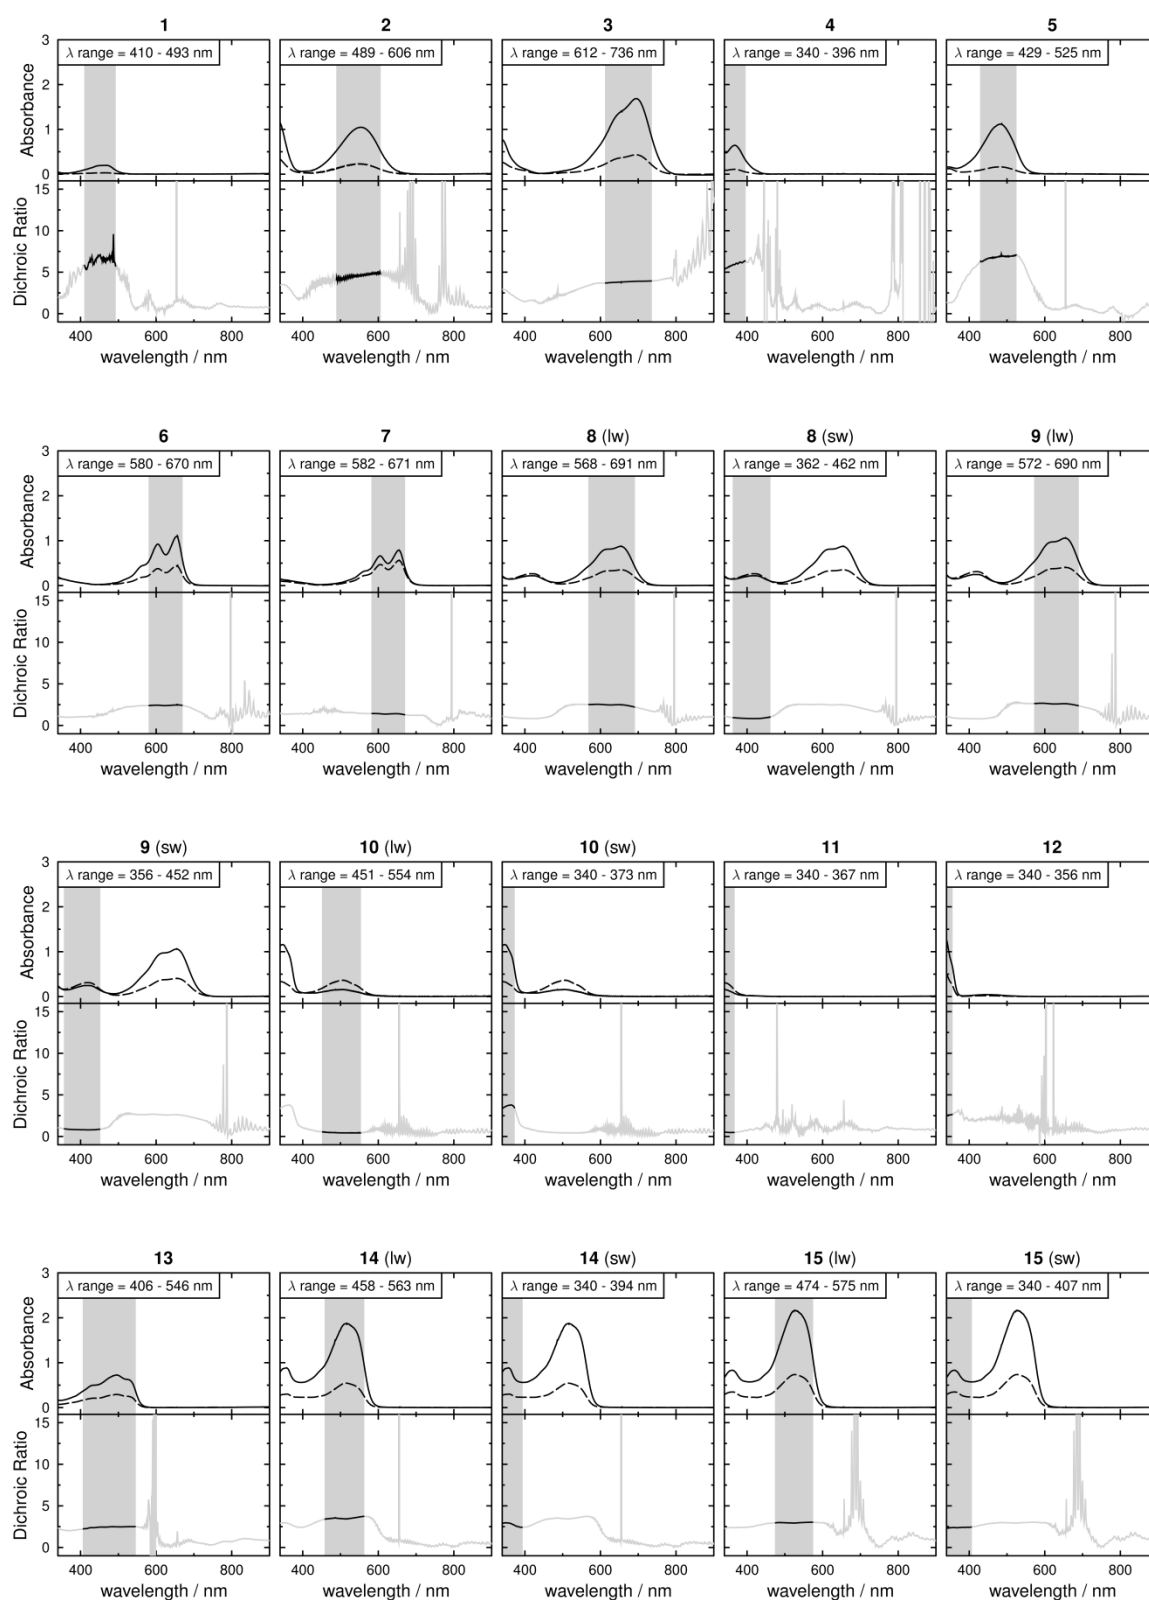

**Figure S1.** Polarized UV-visible absorption spectra of the dyes in 5CB at 298 K along with plots of dichroic ratio against wavelength. Shaded regions were used to determine the dichroic ratios and order

parameters given in Table 1 in the main text. Limits of the shaded regions are listed in the figure (sw = short-wavelength, lw = long-wavelength).

**Table S1.** Experimental absorption maxima,  $\lambda_{\max}$ , dichroic ratios,  $R_{\text{exp}}$ , and dichroic order parameters,  $S_{\text{exp}}$ , of the dyes at *ca.* 0.5 mol % in 5CB determined from the polarized UV-visible absorption spectra shown in Figure S1. The + and – values correspond to the differences between the mean dichroic order parameter,  $S_{\text{exp}}$ , and the dichroic order parameters calculated from the maximum and minimum experimental dichroic ratios, respectively, measured in the ranges over which the average dichroic ratios were determined (Figure S1).

| Dye       | $\lambda_{\max} / \text{nm}^a$ | $R_{\text{exp}}$ | $S_{\text{exp}}$ | +    | –    |
|-----------|--------------------------------|------------------|------------------|------|------|
| <b>1</b>  | 465                            | 6.33             | 0.64             | 0.05 | 0.07 |
| <b>2</b>  | 553                            | 4.52             | 0.54             | 0.05 | 0.03 |
| <b>3</b>  | 695                            | 3.88             | 0.49             | 0.01 | 0.01 |
| <b>4</b>  | 367                            | 5.89             | 0.62             | 0.02 | 0.02 |
| <b>5</b>  | 483                            | 6.82             | 0.66             | 0.02 | 0.01 |
| <b>6</b>  | 654                            | 2.41             | 0.32             | 0.01 | 0.02 |
| <b>7</b>  | 655                            | 1.41             | 0.12             | 0.03 | 0.01 |
| <b>8</b>  | 653                            | 2.48             | 0.33             | 0.04 | 0.01 |
|           | 419                            | 0.88             | –0.04            | 0.02 | 0.06 |
| <b>9</b>  | 655                            | 2.62             | 0.35             | 0.04 | 0.01 |
|           | 423                            | 0.83             | –0.06            | 0.02 | 0.04 |
| <b>10</b> | 507                            | 0.46             | –0.22            | 0.02 | 0.05 |
|           | 345                            | 3.66             | 0.47             | 0.03 | 0.01 |
| <b>11</b> | 345                            | 0.48             | –0.21            | 0.01 | 0.02 |
| <b>12</b> | 340 <sup>b</sup>               | 2.62             | 0.35             | 0.02 | 0.01 |
| <b>13</b> | 496                            | 2.41             | 0.32             | 0.03 | 0.01 |
| <b>14</b> | 516                            | 3.56             | 0.46             | 0.01 | 0.02 |
|           | 357                            | 2.76             | 0.37             | 0.04 | 0.03 |
| <b>15</b> | 530                            | 3.00             | 0.40             | 0.01 | 0.01 |
|           | 360                            | 2.41             | 0.32             | 0.02 | 0.01 |

<sup>a</sup> taken from spectrum with highest absorbance at the peak

<sup>b</sup> short wavelength cut-off

### 3. Optimised dye structures

Conformers of each dye structure are denoted by different letters.

|    |            |           |           |
|----|------------|-----------|-----------|
| 1a |            |           |           |
| C  | -5.995752  | -1.010645 | 1.246397  |
| C  | -5.425334  | -1.189483 | -0.013084 |
| C  | -6.227339  | -1.080849 | -1.147738 |
| C  | -7.577007  | -0.780017 | -1.019941 |
| C  | -8.157703  | -0.587136 | 0.234083  |
| C  | -7.345188  | -0.708049 | 1.362789  |
| S  | -3.719508  | -1.699062 | -0.162868 |
| C  | -2.882072  | -0.134420 | -0.189013 |
| C  | -1.470090  | -0.073295 | -0.224286 |
| C  | -0.826786  | 1.176980  | -0.234160 |
| C  | -1.558402  | 2.355076  | -0.220005 |
| C  | -2.943400  | 2.290900  | -0.190747 |
| C  | -3.595526  | 1.069361  | -0.173412 |
| C  | 0.658841   | 1.297350  | -0.256388 |
| C  | 1.470090   | 0.073246  | -0.224337 |
| C  | 0.826785   | -1.177032 | -0.233880 |
| C  | -0.658842  | -1.297408 | -0.256042 |
| C  | 1.558402   | -2.355124 | -0.219443 |
| C  | 2.943400   | -2.290941 | -0.190228 |
| C  | 3.595527   | -1.069398 | -0.173216 |
| C  | 2.882073   | 0.134380  | -0.189110 |
| S  | 3.719510   | 1.699028  | -0.163386 |
| C  | 5.425340   | 1.189485  | -0.013520 |
| C  | 6.227312   | 1.080560  | -1.148168 |
| C  | 7.576984   | 0.779754  | -1.020331 |
| C  | 8.157711   | 0.587190  | 0.233727  |
| C  | 7.345227   | 0.708394  | 1.362425  |
| C  | 5.995790   | 1.010965  | 1.245992  |
| C  | 9.610655   | 0.224816  | 0.364555  |
| C  | 9.849213   | -1.288241 | 0.341727  |
| C  | 11.320452  | -1.652106 | 0.475904  |
| O  | -1.180378  | -2.399183 | -0.293591 |
| O  | 1.180376   | 2.399116  | -0.294230 |
| C  | -9.610645  | -0.224735 | 0.364851  |
| C  | -9.849236  | 1.288307  | 0.341401  |
| C  | -11.320473 | 1.652198  | 0.475530  |
| H  | 1.023441   | -3.296975 | -0.231058 |
| H  | 3.530262   | -3.203657 | -0.179802 |
| H  | 4.677561   | -1.045372 | -0.148082 |
| H  | 5.789307   | 1.238277  | -2.128075 |
| H  | 5.377320   | 1.116321  | 2.131029  |
| H  | 7.780233   | 0.577047  | 2.349383  |
| H  | 8.194122   | 0.703627  | -1.911311 |
| H  | -1.023442  | 3.296923  | -0.231871 |
| H  | -3.530262  | 3.203618  | -0.180543 |
| H  | -4.677560  | 1.045341  | -0.148254 |
| H  | -5.789360  | -1.238814 | -2.127617 |
| H  | -8.194170  | -0.704121 | -1.910925 |
| H  | -7.780167  | -0.576451 | 2.349725  |
| H  | -5.377258  | -1.115773 | 2.131445  |
| H  | 10.008528  | 0.636717  | 1.299290  |
| H  | 11.466318  | -2.735420 | 0.454647  |
| H  | 11.910809  | -1.221237 | -0.339169 |
| H  | 11.736555  | -1.279240 | 1.417369  |
| H  | 10.179663  | 0.689838  | -0.448846 |

|   |            |           |           |
|---|------------|-----------|-----------|
| H | 9.272830   | -1.751546 | 1.151084  |
| H | 9.445216   | -1.698074 | -0.591462 |
| H | -9.272805  | 1.751966  | 1.150522  |
| H | -9.445314  | 1.697755  | -0.591990 |
| H | -11.466362 | 2.735500  | 0.453836  |
| H | -11.910879 | 1.220980  | -0.339322 |
| H | -11.736501 | 1.279713  | 1.417179  |
| H | -10.179696 | -0.690111 | -0.448318 |
| H | -10.008450 | -0.636252 | 1.299784  |

1b

|   |            |           |           |
|---|------------|-----------|-----------|
| C | 6.138772   | 0.828370  | 1.255096  |
| C | 5.540858   | 1.076092  | 0.020271  |
| C | 6.299388   | 0.953651  | -1.142588 |
| C | 7.631758   | 0.569800  | -1.067312 |
| C | 8.238468   | 0.306047  | 0.161319  |
| C | 7.470583   | 0.443312  | 1.318986  |
| S | 3.862775   | 1.683831  | -0.059216 |
| C | 2.939362   | 0.169595  | -0.125155 |
| C | 1.525670   | 0.188237  | -0.139558 |
| C | 0.813144   | -1.023032 | -0.185451 |
| C | 1.477506   | -2.239758 | -0.223388 |
| C | 2.864150   | -2.253752 | -0.212968 |
| C | 3.584190   | -1.071842 | -0.163612 |
| C | -0.677165  | -1.060424 | -0.192821 |
| C | -1.418835  | 0.205276  | -0.121640 |
| C | -0.706404  | 1.416906  | -0.083795 |
| C | 0.783703   | 1.455525  | -0.110147 |
| C | -1.370790  | 2.632546  | -0.020200 |
| C | -2.757196  | 2.644828  | 0.010996  |
| C | -3.477103  | 1.462278  | -0.022979 |
| C | -2.832313  | 0.222182  | -0.091634 |
| S | -3.755303  | -1.292836 | -0.140508 |
| C | -5.435786  | -0.695935 | -0.035409 |
| C | -6.057836  | -0.570577 | 1.205683  |
| C | -7.393004  | -0.198239 | 1.280915  |
| C | -8.138857  | 0.049275  | 0.127516  |
| C | -7.505878  | -0.085887 | -1.108947 |
| C | -6.171020  | -0.457714 | -1.195441 |
| C | -9.598997  | 0.396021  | 0.212038  |
| C | -10.500088 | -0.842737 | 0.188785  |
| C | -11.978894 | -0.495262 | 0.275750  |
| O | 1.365372   | 2.527443  | -0.103182 |
| O | -1.259071  | -2.130651 | -0.251755 |
| C | 9.668910   | -0.150253 | 0.234462  |
| C | 9.807716   | -1.674296 | 0.167913  |
| C | 11.255671  | -2.135612 | 0.246426  |
| H | 0.890471   | -3.149376 | -0.260311 |
| H | 3.398959   | -3.197471 | -0.243625 |
| H | 4.666125   | -1.109504 | -0.155416 |
| H | 5.841145   | 1.164992  | -2.102926 |
| H | 5.555539   | 0.943905  | 2.162503  |
| H | 7.927266   | 0.257582  | 2.287230  |
| H | 8.215158   | 0.482975  | -1.979802 |
| H | -0.784003  | 3.542743  | 0.004424  |
| H | -3.291899  | 3.587683  | 0.062693  |
| H | -4.558815  | 1.498305  | 0.003284  |
| H | -5.690569  | -0.563363 | -2.162372 |
| H | -8.068584  | 0.101458  | -2.019384 |
| H | -7.866640  | -0.100015 | 2.253842  |
| H | -5.489272  | -0.765137 | 2.108903  |

|   |            |           |           |
|---|------------|-----------|-----------|
| H | 10.122502  | 0.210786  | 1.164751  |
| H | 11.330002  | -3.225315 | 0.197968  |
| H | 11.847519  | -1.725240 | -0.578120 |
| H | 11.723963  | -1.811738 | 1.181495  |
| H | 10.240525  | 0.298166  | -0.586354 |
| H | 9.227480   | -2.120371 | 0.984171  |
| H | 9.349506   | -2.033008 | -0.761191 |
| H | -10.300784 | -1.409859 | -0.727870 |
| H | -10.219739 | -1.501674 | 1.018715  |
| H | -12.600660 | -1.394334 | 0.256166  |
| H | -12.205485 | 0.045092  | 1.200566  |
| H | -12.286955 | 0.139790  | -0.561165 |
| H | -9.870112  | 1.052820  | -0.622744 |
| H | -9.790710  | 0.962119  | 1.130977  |

1c

|   |            |           |           |
|---|------------|-----------|-----------|
| C | -6.197907  | -0.381159 | 1.203197  |
| C | -5.529551  | -0.602193 | 0.000037  |
| C | -6.197756  | -0.381117 | -1.203195 |
| C | -7.510798  | 0.069400  | -1.197639 |
| C | -8.189093  | 0.301381  | -0.000111 |
| C | -7.510942  | 0.069366  | 1.197494  |
| S | -3.881214  | -1.290831 | 0.000125  |
| C | -2.880994  | 0.175258  | -0.000001 |
| C | -1.470062  | 0.084416  | 0.000034  |
| C | -0.696059  | 1.258312  | -0.000047 |
| C | -1.296936  | 2.508252  | -0.000153 |
| C | -2.681001  | 2.593216  | -0.000202 |
| C | -3.460959  | 1.448879  | -0.000130 |
| C | 0.794249   | 1.219641  | -0.000040 |
| C | 1.470061   | -0.084432 | 0.000014  |
| C | 0.696057   | -1.258328 | 0.000076  |
| C | -0.794250  | -1.219657 | 0.000166  |
| C | 1.296935   | -2.508267 | 0.000087  |
| C | 2.681001   | -2.593231 | 0.000044  |
| C | 3.460958   | -1.448894 | -0.000002 |
| C | 2.880993   | -0.175273 | -0.000013 |
| S | 3.881209   | 1.290818  | -0.000069 |
| C | 5.529550   | 0.602188  | -0.000151 |
| C | 6.197822   | 0.380975  | 1.203022  |
| C | 7.510863   | -0.069537 | 1.197341  |
| C | 8.189098   | -0.301368 | -0.000252 |
| C | 7.510883   | -0.069213 | -1.197792 |
| C | 6.197841   | 0.381301  | -1.203371 |
| C | 9.628462   | -0.734494 | -0.000286 |
| C | 10.600396  | 0.450004  | 0.000435  |
| C | 12.057560  | 0.012128  | 0.000416  |
| O | -1.430277  | -2.260307 | 0.000148  |
| O | 1.430277   | 2.260291  | 0.000088  |
| C | -9.628454  | 0.734518  | -0.000179 |
| C | -10.600398 | -0.449971 | 0.000306  |
| C | -12.057559 | -0.012083 | 0.000257  |
| H | -0.663707  | 3.387123  | -0.000209 |
| H | -3.166633  | 3.563630  | -0.000300 |
| H | -4.539498  | 1.542434  | -0.000167 |
| H | -5.681974  | -0.561482 | -2.140410 |
| H | -5.682241  | -0.561557 | 2.140469  |
| H | -8.020430  | 0.243036  | 2.141350  |
| H | -8.020175  | 0.243096  | -2.141549 |
| H | 0.663707   | -3.387139 | 0.000142  |
| H | 3.166633   | -3.563645 | 0.000052  |



|   |            |           |           |
|---|------------|-----------|-----------|
| H | 4.539497   | -1.542448 | -0.000030 |
| H | 5.682123   | 0.561808  | -2.140594 |
| H | 8.020327   | -0.242762 | -2.141694 |
| H | 8.020286   | -0.243348 | 2.141206  |
| H | 5.682089   | 0.561223  | 2.140286  |
| H | -9.825249  | 1.359669  | 0.878528  |
| H | -12.732087 | -0.872476 | 0.000604  |
| H | -12.289599 | 0.592404  | 0.883114  |
| H | -12.289727 | 0.591788  | -0.882987 |
| H | -9.825352  | 1.359037  | -0.879310 |
| H | -10.396312 | -1.077386 | -0.875027 |
| H | -10.396194 | -1.076769 | 0.876054  |
| H | 10.396361  | 1.077544  | -0.874820 |
| H | 10.396130  | 1.076672  | 0.876261  |
| H | 12.732082  | 0.872527  | 0.000933  |
| H | 12.289549  | -0.592487 | 0.883198  |
| H | 12.289791  | -0.591611 | -0.882903 |
| H | 9.825424   | -1.358885 | -0.879493 |
| H | 9.825203   | -1.359769 | 0.878344  |

2a

|   |            |           |           |
|---|------------|-----------|-----------|
| C | -5.909248  | -1.364014 | -0.638792 |
| C | -5.131206  | -0.444684 | 0.067900  |
| C | -5.769041  | 0.438694  | 0.942274  |
| C | -7.149806  | 0.415180  | 1.073751  |
| C | -7.937417  | -0.492736 | 0.365608  |
| C | -7.286536  | -1.387680 | -0.483360 |
| N | -3.737876  | -0.505453 | -0.071624 |
| C | -2.845459  | 0.520402  | -0.118576 |
| C | -1.445428  | 0.250535  | -0.062743 |
| C | -0.534008  | 1.326787  | -0.100850 |
| C | -0.974011  | 2.633283  | -0.212575 |
| C | -2.341017  | 2.885776  | -0.311438 |
| C | -3.259777  | 1.861035  | -0.266070 |
| C | 0.937980   | 1.114903  | -0.010191 |
| C | 1.445429   | -0.250534 | 0.062729  |
| C | 0.534009   | -1.326786 | 0.100837  |
| C | -0.937979  | -1.114902 | 0.010175  |
| C | 0.974012   | -2.633282 | 0.212568  |
| C | 2.341018   | -2.885774 | 0.311436  |
| C | 3.259777   | -1.861033 | 0.266068  |
| C | 2.845459   | -0.520400 | 0.118567  |
| N | 3.737875   | 0.505455  | 0.071610  |
| C | 5.131206   | 0.444685  | -0.067908 |
| C | 5.769045   | -0.438706 | -0.942267 |
| C | 7.149810   | -0.415194 | -1.073738 |
| C | 7.937418   | 0.492731  | -0.365604 |
| C | 7.286534   | 1.387687  | 0.483350  |
| C | 5.909245   | 1.364023  | 0.638777  |
| C | 9.435744   | 0.483326  | -0.487438 |
| C | 10.110211  | -0.473864 | 0.499708  |
| C | 11.626858  | -0.474260 | 0.375659  |
| O | -1.678129  | -2.100473 | -0.010391 |
| O | 1.678130   | 2.100474  | 0.010388  |
| C | -9.435742  | -0.483333 | 0.487449  |
| C | -10.110214 | 0.473869  | -0.499682 |
| C | -11.626861 | 0.474263  | -0.375627 |
| H | -0.240235  | 3.428747  | -0.234007 |
| H | -2.692785  | 3.904965  | -0.435917 |
| H | -4.315580  | 2.075688  | -0.371739 |
| H | -5.420561  | -2.059750 | -1.313567 |

|   |            |           |           |
|---|------------|-----------|-----------|
| H | -5.180000  | 1.121888  | 1.543724  |
| H | -7.625105  | 1.105905  | 1.765068  |
| H | -7.870006  | -2.116538 | -1.039044 |
| H | 0.240236   | -3.428746 | 0.234001  |
| H | 2.692785   | -3.904962 | 0.435920  |
| H | 4.315580   | -2.075684 | 0.371739  |
| H | 5.180006   | -1.121907 | -1.543710 |
| H | 7.625112   | -1.105928 | -1.765045 |
| H | 7.870002   | 2.116551  | 1.039027  |
| H | 5.420556   | 2.059767  | 1.313540  |
| H | -9.823168  | -1.496187 | 0.325318  |
| H | -12.085810 | 1.166398  | -1.086881 |
| H | -12.039878 | -0.521400 | -0.567570 |
| H | -11.941966 | 0.773177  | 0.629463  |
| H | -9.720269  | -0.202586 | 1.508669  |
| H | -9.720509  | 1.485592  | -0.336626 |
| H | -9.816888  | 0.197911  | -1.519346 |
| H | 9.816881   | -0.197894 | 1.519367  |
| H | 9.720507   | -1.485589 | 0.336663  |
| H | 12.085805  | -1.166387 | 1.086924  |
| H | 11.941967  | -0.773186 | -0.629425 |
| H | 12.039875  | 0.521405  | 0.567591  |
| H | 9.823170   | 1.496182  | -0.325318 |
| H | 9.720275   | 0.202567  | -1.508654 |
| H | -3.296382  | -1.424728 | -0.107489 |
| H | 3.296381   | 1.424730  | 0.107462  |

2b

|   |            |           |           |
|---|------------|-----------|-----------|
| C | 5.935555   | -0.938949 | -1.072404 |
| C | 5.150207   | -0.084345 | -0.295276 |
| C | 5.787130   | 0.788079  | 0.590225  |
| C | 7.172273   | 0.816797  | 0.666455  |
| C | 7.966067   | -0.027680 | -0.109374 |
| C | 7.317529   | -0.911930 | -0.971584 |
| N | 3.756329   | -0.194723 | -0.389432 |
| C | 2.820746   | 0.792391  | -0.354687 |
| C | 1.436110   | 0.458168  | -0.268816 |
| C | 0.478685   | 1.493264  | -0.220923 |
| C | 0.858324   | 2.822054  | -0.277627 |
| C | 2.209050   | 3.139694  | -0.407201 |
| C | 3.171924   | 2.155879  | -0.445287 |
| C | -0.978973  | 1.212095  | -0.093873 |
| C | -1.425242  | -0.176268 | -0.076986 |
| C | -0.468002  | -1.211405 | -0.127827 |
| C | 0.989809   | -0.930240 | -0.253494 |
| C | -0.847705  | -2.540231 | -0.072261 |
| C | -2.198201  | -2.857844 | 0.059691  |
| C | -3.160827  | -1.874008 | 0.103242  |
| C | -2.809652  | -0.510367 | 0.014716  |
| N | -3.744265  | 0.477185  | 0.056542  |
| C | -5.139786  | 0.365462  | -0.008162 |
| C | -5.909317  | 1.218011  | 0.786463  |
| C | -7.293065  | 1.192518  | 0.711979  |
| C | -7.958703  | 0.312424  | -0.141166 |
| C | -7.180465  | -0.527637 | -0.937649 |
| C | -5.794184  | -0.500364 | -0.887555 |
| C | -9.460172  | 0.246555  | -0.173983 |
| C | -10.035228 | -0.764775 | 0.822075  |
| C | -11.555425 | -0.823962 | 0.790204  |
| O | 1.769859   | -1.879967 | -0.349656 |
| O | -1.758767  | 2.162019  | 0.002927  |

|   |            |           |           |
|---|------------|-----------|-----------|
| C | 9.464101   | -0.024208 | 0.018391  |
| C | 9.974651   | -0.989827 | 1.091984  |
| C | 11.491452  | -0.986030 | 1.213871  |
| H | -0.080592  | -3.302478 | -0.118689 |
| H | -2.501619  | -3.896818 | 0.140143  |
| H | -4.201503  | -2.141396 | 0.234741  |
| H | -5.408463  | 1.900741  | 1.465612  |
| H | -5.216506  | -1.128743 | -1.556020 |
| H | -7.669152  | -1.204487 | -1.633311 |
| H | -7.869785  | 1.869704  | 1.335940  |
| H | 0.091025   | 3.584252  | -0.233513 |
| H | 2.512470   | 4.178499  | -0.489696 |
| H | 4.212982   | 2.422976  | -0.574490 |
| H | 5.196996   | 1.426966  | 1.237397  |
| H | 7.647382   | 1.506071  | 1.359273  |
| H | 7.907244   | -1.583874 | -1.589120 |
| H | 5.448492   | -1.618219 | -1.764895 |
| H | -9.875545  | 1.237928  | 0.042667  |
| H | -11.941943 | -1.552242 | 1.508382  |
| H | -11.994713 | 0.148696  | 1.034655  |
| H | -11.920190 | -1.109858 | -0.201783 |
| H | -9.795556  | -0.015854 | -1.184499 |
| H | -9.616818  | -1.754655 | 0.605057  |
| H | -9.690752  | -0.505716 | 1.830116  |
| H | 9.520232   | -0.724837 | 2.053842  |
| H | 9.619308   | -2.000333 | 0.858619  |
| H | 11.831805  | -1.682721 | 1.984782  |
| H | 11.965233  | -1.276961 | 0.270630  |
| H | 11.865563  | 0.008823  | 1.476926  |
| H | 9.914623   | -0.290168 | -0.945298 |
| H | 9.811502   | 0.988871  | 0.253404  |
| H | -3.338602  | 1.411144  | 0.124582  |
| H | 3.351715   | -1.128880 | -0.460353 |

2c

|   |           |           |           |
|---|-----------|-----------|-----------|
| C | 5.919114  | 0.839536  | 1.180608  |
| C | 5.139198  | 0.020553  | 0.361180  |
| C | 5.782804  | -0.879571 | -0.491141 |
| C | 7.167227  | -0.970320 | -0.493699 |
| C | 7.955485  | -0.161624 | 0.324977  |
| C | 7.302100  | 0.750799  | 1.153366  |
| N | 3.748009  | 0.190341  | 0.381044  |
| C | 2.776443  | -0.759357 | 0.311022  |
| C | 1.411358  | -0.372089 | 0.159967  |
| C | 0.416928  | -1.369624 | 0.078103  |
| C | 0.741114  | -2.711609 | 0.161852  |
| C | 2.071310  | -3.080560 | 0.353299  |
| C | 3.069396  | -2.134727 | 0.427010  |
| C | -1.021703 | -1.032735 | -0.113031 |
| C | -1.411357 | 0.371989  | -0.159624 |
| C | -0.416923 | 1.369521  | -0.077772 |
| C | 1.021684  | 1.032633  | 0.113541  |
| C | -0.741083 | 2.711501  | -0.161703 |
| C | -2.071254 | 3.080448  | -0.353325 |
| C | -3.069345 | 2.134619  | -0.427027 |
| C | -2.776422 | 0.759259  | -0.310848 |
| N | -3.748003 | -0.190427 | -0.380817 |
| C | -5.139189 | -0.020599 | -0.361112 |
| C | -5.919054 | -0.839715 | -1.180455 |
| C | -7.302040 | -0.750936 | -1.153353 |
| C | -7.955473 | 0.161662  | -0.325194 |

|   |            |           |           |
|---|------------|-----------|-----------|
| C | -7.167266  | 0.970493  | 0.493397  |
| C | -5.782846  | 0.879706  | 0.490979  |
| C | -9.456482  | 0.231909  | -0.275666 |
| C | -10.063079 | -0.694282 | 0.782553  |
| C | -11.582195 | -0.619200 | 0.829312  |
| O | 1.834162   | 1.951747  | 0.235874  |
| O | -1.834123  | -1.951846 | -0.235775 |
| C | 9.456491   | -0.231822 | 0.275303  |
| C | 10.062970  | 0.694588  | -0.782793 |
| C | 11.582083  | 0.619549  | -0.829705 |
| H | 0.053158   | 3.443430  | -0.090032 |
| H | -2.329602  | 4.129514  | -0.456745 |
| H | -4.092635  | 2.440684  | -0.603343 |
| H | -5.426548  | -1.540243 | -1.847428 |
| H | -5.199420  | 1.491909  | 1.169338  |
| H | -7.647377  | 1.680787  | 1.161083  |
| H | -7.887275  | -1.396066 | -1.802918 |
| H | -0.053124  | -3.443541 | 0.090182  |
| H | 2.329682   | -4.129634 | 0.456576  |
| H | 4.092705   | -2.440798 | 0.603201  |
| H | 5.199337   | -1.491659 | -1.169567 |
| H | 7.647298   | -1.680472 | -1.161564 |
| H | 7.887375   | 1.395822  | 1.803003  |
| H | 5.426648   | 1.539923  | 1.847758  |
| H | -9.868379  | -0.028654 | -1.257907 |
| H | -11.991821 | -1.287679 | 1.591459  |
| H | -11.921588 | 0.395756  | 1.060686  |
| H | -12.022695 | -0.902352 | -0.132242 |
| H | -9.770790  | 1.262482  | -0.071781 |
| H | -9.743723  | -1.723096 | 0.579157  |
| H | -9.644686  | -0.436627 | 1.762595  |
| H | 9.644494   | 0.437112  | -1.762847 |
| H | 9.743609   | 1.723355  | -0.579169 |
| H | 11.991625  | 1.288185  | -1.591760 |
| H | 12.022665  | 0.902525  | 0.131864  |
| H | 11.921479  | -0.395354 | -1.061306 |
| H | 9.868468   | 0.028564  | 1.257557  |
| H | 9.770807   | -1.262347 | 0.071192  |
| H | -3.378596  | -1.140646 | -0.425638 |
| H | 3.378581   | 1.140542  | 0.426083  |

2d

|   |           |           |           |
|---|-----------|-----------|-----------|
| C | -5.996384 | -0.767992 | 1.153237  |
| C | -5.145684 | -0.047400 | 0.312463  |
| C | -5.704959 | 0.686881  | -0.735616 |
| C | -7.080669 | 0.713951  | -0.912843 |
| C | -7.940057 | 0.002113  | -0.076284 |
| C | -7.367915 | -0.745528 | 0.953267  |
| N | -3.761556 | -0.148183 | 0.513398  |
| C | -2.821978 | 0.830389  | 0.409314  |
| C | -1.435754 | 0.494561  | 0.428603  |
| C | -0.475504 | 1.522293  | 0.318552  |
| C | -0.855541 | 2.847938  | 0.212934  |
| C | -2.211107 | 3.171550  | 0.229254  |
| C | -3.175944 | 2.193556  | 0.323602  |
| C | 0.986298  | 1.235138  | 0.308071  |
| C | 1.426368  | -0.154544 | 0.362791  |
| C | 0.467781  | -1.178163 | 0.516569  |
| C | -0.991909 | -0.886252 | 0.581285  |
| C | 0.847107  | -2.504660 | 0.614524  |
| C | 2.201567  | -2.830270 | 0.577311  |

|    |            |           |           |
|----|------------|-----------|-----------|
| C  | 3.164086   | -1.858188 | 0.418292  |
| C  | 2.808923   | -0.499110 | 0.286963  |
| N  | 3.744478   | 0.477028  | 0.133347  |
| C  | 5.110831   | 0.344372  | -0.146167 |
| C  | 5.998080   | 1.248002  | 0.443028  |
| C  | 7.351537   | 1.200866  | 0.148100  |
| C  | 7.871754   | 0.248429  | -0.728469 |
| C  | 6.975776   | -0.642543 | -1.318871 |
| C  | 5.615913   | -0.595366 | -1.048174 |
| C  | 9.347819   | 0.162205  | -0.999434 |
| C  | 10.083130  | -0.751938 | -0.015024 |
| C  | 11.576162  | -0.839773 | -0.295220 |
| O  | -1.776507  | -1.820370 | 0.757918  |
| O  | 1.775730   | 2.180075  | 0.249702  |
| C  | -9.425556  | -0.003273 | -0.308319 |
| C  | -9.884521  | -1.146820 | -1.217902 |
| C  | -11.388960 | -1.148307 | -1.446733 |
| H  | 0.078658   | -3.257725 | 0.733258  |
| H  | 2.509842   | -3.865304 | 0.685274  |
| H  | 4.212033   | -2.129564 | 0.422087  |
| H  | 5.613213   | 1.988524  | 1.137192  |
| H  | 4.939333   | -1.267446 | -1.563800 |
| H  | 7.346347   | -1.377639 | -2.028229 |
| H  | 8.020182   | 1.918895  | 0.614908  |
| H  | -0.085708  | 3.604695  | 0.133146  |
| H  | -2.517175  | 4.211518  | 0.176437  |
| H  | -4.222831  | 2.467416  | 0.361125  |
| H  | -5.059226  | 1.218782  | -1.425410 |
| H  | -7.495574  | 1.293885  | -1.732775 |
| H  | -8.010277  | -1.310684 | 1.623074  |
| H  | -5.569657  | -1.337958 | 1.972465  |
| H  | 9.789440   | 1.164888  | -0.955091 |
| H  | 12.078876  | -1.496697 | 0.419812  |
| H  | 11.768247  | -1.232544 | -1.299056 |
| H  | 12.049993  | 0.145240  | -0.231166 |
| H  | 9.513038   | -0.203869 | -2.019823 |
| H  | 9.913296   | -0.385860 | 1.004342  |
| H  | 9.634298   | -1.751433 | -0.055484 |
| H  | -9.358745  | -1.071607 | -2.176917 |
| H  | -9.571442  | -2.100050 | -0.776096 |
| H  | -11.693564 | -1.974112 | -2.095404 |
| H  | -11.932911 | -1.249696 | -0.501914 |
| H  | -11.718876 | -0.216739 | -1.918096 |
| H  | -9.947529  | -0.079948 | 0.653012  |
| H  | -9.731628  | 0.951774  | -0.751483 |
| H  | 3.356342   | 1.418460  | 0.199325  |
| H  | -3.366379  | -1.067463 | 0.712476  |
| 2e |            |           |           |
| C  | 6.051103   | -0.756535 | -0.981680 |
| C  | 5.136469   | -0.007332 | -0.238933 |
| C  | 5.619756   | 0.832974  | 0.766552  |
| C  | 6.984167   | 0.935090  | 0.995410  |
| C  | 7.907150   | 0.196031  | 0.255723  |
| C  | 7.410772   | -0.657854 | -0.729522 |
| N  | 3.767293   | -0.181439 | -0.487137 |
| C  | 2.789557   | 0.764707  | -0.508170 |
| C  | 1.418337   | 0.375337  | -0.559135 |
| C  | 0.419030   | 1.371240  | -0.579809 |
| C  | 0.747506   | 2.714809  | -0.570753 |
| C  | 2.090226   | 3.087741  | -0.554579 |

|    |            |           |           |
|----|------------|-----------|-----------|
| C  | 3.091486   | 2.142947  | -0.523458 |
| C  | -1.030648  | 1.029596  | -0.611327 |
| C  | -1.418360  | -0.375620 | -0.559123 |
| C  | -0.419053  | -1.371525 | -0.579615 |
| C  | 1.030629   | -1.029887 | -0.611112 |
| C  | -0.747533  | -2.715092 | -0.570367 |
| C  | -2.090254  | -3.088019 | -0.554155 |
| C  | -3.091514  | -2.143217 | -0.523186 |
| C  | -2.789579  | -0.764979 | -0.508122 |
| N  | -3.767305  | 0.181182  | -0.487283 |
| C  | -5.136471  | 0.007210  | -0.239004 |
| C  | -6.051060  | 0.756524  | -0.981703 |
| C  | -7.410728  | 0.657996  | -0.729487 |
| C  | -7.907164  | -0.195835 | 0.255776  |
| C  | -6.984229  | -0.935001 | 0.995416  |
| C  | -5.619817  | -0.833048 | 0.766496  |
| C  | -9.380174  | -0.275627 | 0.546203  |
| C  | -9.841484  | 0.753987  | 1.581880  |
| C  | -11.332622 | 0.668667  | 1.873086  |
| O  | 1.854926   | -1.944064 | -0.674810 |
| O  | -1.854947  | 1.943757  | -0.675230 |
| C  | 9.380166   | 0.275997  | 0.546083  |
| C  | 9.841588   | -0.753346 | 1.581976  |
| C  | 11.332728  | -0.667839 | 1.873115  |
| H  | 0.050991   | -3.445649 | -0.589664 |
| H  | -2.357494  | -4.139735 | -0.576264 |
| H  | -4.128764  | -2.453200 | -0.538625 |
| H  | -5.683706  | 1.408973  | -1.767469 |
| H  | -4.924055  | -1.390603 | 1.383564  |
| H  | -7.339251  | -1.597728 | 1.779978  |
| H  | -8.103784  | 1.247387  | -1.323588 |
| H  | -0.051021  | 3.445360  | -0.590166 |
| H  | 2.357465   | 4.139453  | -0.576846 |
| H  | 4.128738   | 2.452922  | -0.538934 |
| H  | 4.923951   | 1.390463  | 1.383631  |
| H  | 7.339141   | 1.597857  | 1.779959  |
| H  | 8.103879   | -1.247153 | -1.323654 |
| H  | 5.683783   | -1.409019 | -1.767432 |
| H  | -9.946138  | -0.128499 | -0.381425 |
| H  | -11.637894 | 1.412612  | 2.613942  |
| H  | -11.923750 | 0.839885  | 0.967496  |
| H  | -11.604466 | -0.318134 | 2.261890  |
| H  | -9.629939  | -1.281183 | 0.904963  |
| H  | -9.269768  | 0.609152  | 2.506022  |
| H  | -9.586027  | 1.757908  | 1.223085  |
| H  | 9.269891   | -0.608348 | 2.506105  |
| H  | 9.586199   | -1.757369 | 1.223416  |
| H  | 11.638085  | -1.411596 | 2.614124  |
| H  | 11.923841  | -0.839208 | 0.967544  |
| H  | 11.604504  | 0.319070  | 2.261692  |
| H  | 9.946104   | 0.128700  | -0.381534 |
| H  | 9.629870   | 1.281654  | 0.904605  |
| H  | -3.415648  | 1.128666  | -0.626181 |
| H  | 3.415651   | -1.128961 | -0.625816 |
| 2f |            |           |           |
| C  | 5.929443   | -1.308944 | -0.674479 |
| C  | 5.125629   | -0.435017 | 0.060871  |
| C  | 5.730668   | 0.388697  | 1.013164  |
| C  | 7.105968   | 0.353887  | 1.192948  |
| C  | 7.919046   | -0.508298 | 0.457236  |

|   |            |           |           |
|---|------------|-----------|-----------|
| C | 7.299873   | -1.345596 | -0.470781 |
| N | 3.739019   | -0.485582 | -0.135137 |
| C | 2.844305   | 0.539142  | -0.154196 |
| C | 1.445147   | 0.260520  | -0.191919 |
| C | 0.528671   | 1.332779  | -0.211612 |
| C | 0.963725   | 2.645630  | -0.211305 |
| C | 2.332045   | 2.909951  | -0.208869 |
| C | 3.255378   | 1.888535  | -0.181592 |
| C | -0.944293  | 1.109266  | -0.236866 |
| C | -1.445164  | -0.259793 | -0.192094 |
| C | -0.528680  | -1.332048 | -0.211778 |
| C | 0.944276   | -1.108527 | -0.237006 |
| C | -0.963717  | -2.644904 | -0.211566 |
| C | -2.332033  | -2.909242 | -0.209232 |
| C | -3.255381  | -1.887842 | -0.181992 |
| C | -2.844334  | -0.538442 | -0.154508 |
| N | -3.739085  | 0.486236  | -0.135465 |
| C | -5.125735  | 0.435487  | 0.060372  |
| C | -5.929575  | 1.309121  | -0.675283 |
| C | -7.300045  | 1.345602  | -0.471777 |
| C | -7.919197  | 0.508423  | 0.456351  |
| C | -7.106078  | -0.353459 | 1.192384  |
| C | -5.730753  | -0.388096 | 1.012781  |
| C | -9.412186  | 0.510674  | 0.632164  |
| C | -10.122896 | -0.495507 | -0.277787 |
| C | -11.634533 | -0.481538 | -0.103492 |
| O | 1.691056   | -2.087691 | -0.293756 |
| O | -1.691060  | 2.088455  | -0.293326 |
| C | 9.412015   | -0.510805 | 0.633201  |
| C | 10.123334  | 0.492510  | -0.279428 |
| C | 11.634952  | 0.478153  | -0.104985 |
| H | -0.226029  | -3.436826 | -0.228576 |
| H | -2.682014  | -3.936171 | -0.239811 |
| H | -4.313543  | -2.114471 | -0.210441 |
| H | -5.465949  | 1.959142  | -1.410644 |
| H | -5.119887  | -1.031284 | 1.636057  |
| H | -7.555859  | -0.997363 | 1.943341  |
| H | -7.903750  | 2.038263  | -1.051654 |
| H | 0.226054   | 3.437568  | -0.228327 |
| H | 2.682038   | 3.936876  | -0.239423 |
| H | 4.313544   | 2.115153  | -0.209964 |
| H | 5.119815   | 1.032085  | 1.636244  |
| H | 7.555786   | 0.997902  | 1.943785  |
| H | 7.903511   | -2.038535 | -1.050398 |
| H | 5.465830   | -1.959081 | -1.409748 |
| H | -9.803441  | 1.514759  | 0.429528  |
| H | -12.119208 | -1.208147 | -0.761281 |
| H | -11.917184 | -0.725006 | 0.925930  |
| H | -12.050369 | 0.504604  | -0.334459 |
| H | -9.660235  | 0.286331  | 1.676502  |
| H | -9.863276  | -0.276719 | -1.320234 |
| H | -9.731094  | -1.498799 | -0.073032 |
| H | 9.863676   | 0.271057  | -1.321303 |
| H | 9.732070   | 1.496566  | -0.077412 |
| H | 12.120092  | 1.202727  | -0.764674 |
| H | 11.917658  | 0.724216  | 0.923804  |
| H | 12.050239  | -0.508843 | -0.333278 |
| H | 9.802812   | -1.515638 | 0.433369  |
| H | 9.660037   | -0.283713 | 1.676946  |
| H | -3.304356  | 1.400862  | -0.261666 |
| H | 3.304288   | -1.400128 | -0.261843 |

|    |            |           |           |
|----|------------|-----------|-----------|
| 3a |            |           |           |
| C  | 5.922920   | 1.373130  | 0.712932  |
| C  | 5.121612   | 0.474239  | 0.004950  |
| C  | 5.733215   | -0.394596 | -0.903015 |
| C  | 7.110688   | -0.378440 | -1.064769 |
| C  | 7.921138   | 0.508302  | -0.355489 |
| C  | 7.296209   | 1.390096  | 0.526439  |
| N  | 3.733802   | 0.540320  | 0.181193  |
| C  | 2.832001   | -0.481850 | 0.177744  |
| C  | 1.437973   | -0.235789 | 0.096379  |
| C  | 0.520447   | -1.328956 | 0.084244  |
| C  | 0.993411   | -2.647329 | 0.167151  |
| C  | 2.377641   | -2.865409 | 0.306074  |
| C  | 3.262099   | -1.825612 | 0.313067  |
| C  | -0.916705  | -1.113914 | -0.035622 |
| C  | -1.437972  | 0.235775  | -0.096317 |
| C  | -0.520446  | 1.328942  | -0.084180 |
| C  | 0.916705   | 1.113900  | 0.035697  |
| C  | -0.993408  | 2.647315  | -0.167104 |
| C  | -2.377637  | 2.865394  | -0.306052 |
| C  | -3.262094  | 1.825597  | -0.313050 |
| C  | -2.831999  | 0.481836  | -0.177706 |
| N  | -3.733802  | -0.540332 | -0.181155 |
| C  | -5.121615  | -0.474241 | -0.004937 |
| C  | -5.922915  | -1.373145 | -0.712912 |
| C  | -7.296207  | -1.390099 | -0.526442 |
| C  | -7.921146  | -0.508281 | 0.355454  |
| C  | -7.110704  | 0.378475  | 1.064726  |
| C  | -5.733228  | 0.394620  | 0.902995  |
| C  | -9.416123  | -0.489710 | 0.511404  |
| C  | -10.103630 | 0.498631  | -0.435341 |
| C  | -11.616834 | 0.511237  | -0.275313 |
| O  | 1.682921   | 2.112755  | 0.092345  |
| O  | -1.682914  | -2.112770 | -0.092338 |
| C  | 9.416111   | 0.489743  | -0.511466 |
| C  | 10.103640  | -0.498619 | 0.435242  |
| C  | 11.616841  | -0.511214 | 0.275187  |
| O  | -0.208204  | 3.717710  | -0.143552 |
| H  | -2.716697  | 3.888986  | -0.420588 |
| H  | -4.317694  | 2.023205  | -0.451577 |
| H  | -5.455476  | -2.056728 | -1.414643 |
| H  | -5.125911  | 1.059194  | 1.507323  |
| H  | -7.564932  | 1.057219  | 1.781521  |
| H  | -7.897688  | -2.102492 | -1.084207 |
| O  | 0.208205   | -3.717724 | 0.143606  |
| H  | 2.716704   | -3.889002 | 0.420598  |
| H  | 4.317700   | -2.023222 | 0.451580  |
| H  | 5.125891   | -1.059157 | -1.507350 |
| H  | 7.564906   | -1.057163 | -1.781590 |
| H  | 7.897696   | 2.102478  | 1.084211  |
| H  | 5.455490   | 2.056694  | 1.414688  |
| H  | -9.816188  | -1.494693 | 0.332206  |
| H  | -12.084730 | 1.225120  | -0.958660 |
| H  | -12.045016 | -0.475146 | -0.481282 |
| H  | -11.905074 | 0.788983  | 0.743805  |
| H  | -9.674863  | -0.232950 | 1.545690  |
| H  | -9.699656  | 1.502065  | -0.256506 |
| H  | -9.837283  | 0.245316  | -1.468217 |
| H  | 9.837310   | -0.245332 | 1.468130  |
| H  | 9.699667   | -1.502051 | 0.256388  |



|   |           |           |           |
|---|-----------|-----------|-----------|
| H | 12.084753 | -1.225113 | 0.958507  |
| H | 11.905064 | -0.788932 | -0.743943 |
| H | 12.045022 | 0.475165  | 0.481174  |
| H | 9.816174  | 1.494723  | -0.332248 |
| H | 9.674835  | 0.233011  | -1.545763 |
| H | -3.300104 | -1.460672 | -0.235506 |
| H | 3.300102  | 1.460658  | 0.235573  |
| H | 0.714101  | 3.363300  | -0.044679 |
| H | -0.714104 | -3.363311 | 0.044777  |

3b

|   |            |           |           |
|---|------------|-----------|-----------|
| C | -5.750304  | -0.490660 | -0.830633 |
| C | -5.127262  | 0.371779  | 0.075365  |
| C | -5.925899  | 1.212062  | 0.855122  |
| C | -7.306402  | 1.177883  | 0.739865  |
| C | -7.941059  | 0.300811  | -0.139977 |
| C | -7.134174  | -0.526948 | -0.920777 |
| N | -3.736288  | 0.492067  | 0.183602  |
| C | -2.791529  | -0.487009 | 0.105778  |
| C | -1.413931  | -0.172813 | -0.016275 |
| C | -0.448234  | -1.220097 | -0.102798 |
| C | -0.856892  | -2.561443 | -0.054979 |
| C | -2.223860  | -2.849496 | 0.122494  |
| C | -3.154412  | -1.853744 | 0.201979  |
| C | 0.972538   | -0.933216 | -0.262055 |
| C | 1.429184   | 0.440684  | -0.287468 |
| C | 0.463317   | 1.487960  | -0.202861 |
| C | -0.957374  | 1.201069  | -0.043021 |
| C | 0.871995   | 2.829304  | -0.251168 |
| C | 2.239156   | 3.117298  | -0.427385 |
| C | 3.169906   | 2.121483  | -0.503567 |
| C | 2.807015   | 0.754883  | -0.405742 |
| N | 3.752608   | -0.223966 | -0.478731 |
| C | 5.142005   | -0.105119 | -0.350793 |
| C | 5.950776   | -0.945591 | -1.120176 |
| C | 7.329703   | -0.909357 | -0.988994 |
| C | 7.953078   | -0.029399 | -0.103765 |
| C | 7.136418   | 0.800763  | 0.663806  |
| C | 5.753588   | 0.762384  | 0.557974  |
| C | 9.447874   | -0.016708 | 0.056116  |
| C | 9.942414   | -0.990222 | 1.130158  |
| C | 11.456449  | -0.979128 | 1.282139  |
| O | -1.765810  | 2.160406  | 0.077596  |
| O | 1.781011   | -1.892425 | -0.383064 |
| C | -9.440328  | 0.225594  | -0.217636 |
| C | -10.037717 | -0.798958 | 0.751492  |
| C | -11.555732 | -0.868715 | 0.672369  |
| O | -0.024962  | -3.592154 | -0.146910 |
| H | -2.511380  | -3.891561 | 0.207736  |
| H | -4.193788  | -2.106759 | 0.369691  |
| H | -5.449993  | 1.890892  | 1.555801  |
| H | -5.149534  | -1.107717 | -1.489398 |
| H | -7.597798  | -1.200148 | -1.636756 |
| H | -7.905820  | 1.845304  | 1.352802  |
| O | 0.039956   | 3.860018  | -0.160868 |
| H | 2.526663   | 4.159239  | -0.514118 |
| H | 4.209543   | 2.374194  | -0.670216 |
| H | 5.145231   | 1.388447  | 1.201013  |
| H | 7.591276   | 1.485449  | 1.374461  |
| H | 7.937765   | -1.569932 | -1.600906 |
| H | 5.484210   | -1.619732 | -1.831549 |

|   |            |           |           |
|---|------------|-----------|-----------|
| H | -9.868588  | 1.212149  | -0.004195 |
| H | -11.958600 | -1.606469 | 1.371607  |
| H | -12.009603 | 0.098401  | 0.912036  |
| H | -11.887585 | -1.147982 | -0.332950 |
| H | -9.743934  | -0.029417 | -1.240022 |
| H | -9.605586  | -1.783807 | 0.538460  |
| H | -9.726080  | -0.546642 | 1.771871  |
| H | 9.467418   | -0.737412 | 2.085327  |
| H | 9.597711   | -2.000334 | 0.879729  |
| H | 11.785390  | -1.681228 | 2.053065  |
| H | 11.950362  | -1.258590 | 0.345797  |
| H | 11.819660  | 0.015199  | 1.561867  |
| H | 9.920685   | -0.269260 | -0.900495 |
| H | 9.782837   | 0.996243  | 0.308989  |
| H | -3.340414  | 1.428167  | 0.256774  |
| H | 3.357353   | -1.160115 | -0.554234 |
| H | -0.861107  | 3.459175  | -0.044878 |
| H | 0.876054   | -3.191230 | -0.262953 |

3c

|   |            |           |           |
|---|------------|-----------|-----------|
| C | -5.741866  | 0.867971  | 0.454937  |
| C | -5.126553  | -0.023045 | -0.428178 |
| C | -5.933702  | -0.822454 | -1.241458 |
| C | -7.314473  | -0.723340 | -1.177874 |
| C | -7.939789  | 0.180725  | -0.318829 |
| C | -7.124892  | 0.969658  | 0.493049  |
| N | -3.738930  | -0.203183 | -0.487921 |
| C | -2.757434  | 0.735607  | -0.374656 |
| C | -1.400370  | 0.364937  | -0.195669 |
| C | -0.396413  | 1.371743  | -0.071468 |
| C | -0.746562  | 2.728637  | -0.139512 |
| C | -2.091776  | 3.072512  | -0.374411 |
| C | -3.058849  | 2.115849  | -0.489409 |
| C | 1.003054   | 1.026653  | 0.148427  |
| C | 1.400374   | -0.365043 | 0.196196  |
| C | 0.396412   | -1.371851 | 0.072047  |
| C | -1.003067  | -1.026762 | -0.147777 |
| C | 0.746583   | -2.728744 | 0.139969  |
| C | 2.091842   | -3.072622 | 0.374611  |
| C | 3.058924   | -2.115956 | 0.489523  |
| C | 2.757469   | -0.735707 | 0.374948  |
| N | 3.738959   | 0.203092  | 0.488182  |
| C | 5.126580   | 0.023004  | 0.428204  |
| C | 5.933823   | 0.822310  | 1.241492  |
| C | 7.314587   | 0.723248  | 1.177691  |
| C | 7.939806   | -0.180662 | 0.318413  |
| C | 7.124814   | -0.969493 | -0.493470 |
| C | 5.741790   | -0.867854 | -0.455141 |
| C | 9.438440   | -0.261160 | 0.230407  |
| C | 10.025839  | 0.678746  | -0.826654 |
| C | 11.542901  | 0.595246  | -0.910482 |
| O | -1.845135  | -1.951840 | -0.301270 |
| O | 1.845236   | 1.951741  | 0.301236  |
| C | -9.438434  | 0.261283  | -0.231054 |
| C | -10.026016 | -0.678441 | 0.826068  |
| C | -11.543088 | -0.594881 | 0.909661  |
| O | 0.123036   | 3.724356  | -0.015538 |
| H | -2.331850  | 4.125215  | -0.474408 |
| H | -4.079300  | 2.410750  | -0.699715 |
| H | -5.463864  | -1.514479 | -1.933222 |
| H | -5.137307  | 1.462624  | 1.130583  |

|   |            |           |           |
|---|------------|-----------|-----------|
| H | -7.582462  | 1.671827  | 1.184659  |
| H | -7.921173  | -1.352803 | -1.823032 |
| O | -0.123040  | -3.724463 | 0.016166  |
| H | 2.331941   | -4.125328 | 0.474515  |
| H | 4.079408   | -2.410861 | 0.699656  |
| H | 5.137152   | -1.462419 | -1.130793 |
| H | 7.582305   | -1.671539 | -1.185258 |
| H | 7.921362   | 1.352629  | 1.822860  |
| H | 5.464064   | 1.514212  | 1.933433  |
| H | -9.876134  | 0.020289  | -1.207108 |
| H | -11.938949 | -1.273115 | 1.670434  |
| H | -11.870575 | 0.418188  | 1.165131  |
| H | -12.007689 | -0.859932 | -0.045680 |
| H | -9.739628  | 1.290518  | -0.002306 |
| H | -9.718260  | -1.705746 | 0.598527  |
| H | -9.583078  | -0.439437 | 1.800034  |
| H | 9.582766   | 0.439882  | -1.800593 |
| H | 9.718086   | 1.706007  | -0.598907 |
| H | 11.938630  | 1.273610  | -1.671208 |
| H | 12.007634  | 0.860161  | 0.044831  |
| H | 11.870381  | -0.417774 | -1.166159 |
| H | 9.876276   | -0.020306 | 1.206434  |
| H | 9.739633   | -1.290351 | 0.001454  |
| H | -3.380586  | -1.155423 | -0.543667 |
| H | 3.380595   | 1.155313  | 0.544141  |
| H | -1.001076  | -3.287294 | -0.138289 |
| H | 1.000979   | 3.287196  | 0.139471  |

3d

|   |            |           |           |
|---|------------|-----------|-----------|
| C | 5.548559   | -0.570317 | -1.083481 |
| C | 5.094333   | 0.356629  | -0.141412 |
| C | 6.018542   | 1.234218  | 0.430940  |
| C | 7.357760   | 1.174473  | 0.079714  |
| C | 7.827681   | 0.234990  | -0.838438 |
| C | 6.895328   | -0.630458 | -1.410538 |
| N | 3.743615   | 0.501899  | 0.197359  |
| C | 2.796409   | -0.467699 | 0.341529  |
| C | 1.418442   | -0.144063 | 0.426373  |
| C | 0.449557   | -1.181244 | 0.575530  |
| C | 0.858221   | -2.520474 | 0.663133  |
| C | 2.234561   | -2.815244 | 0.620782  |
| C | 3.167056   | -1.829891 | 0.467238  |
| C | -0.977328  | -0.886264 | 0.633831  |
| C | -1.432544  | 0.482122  | 0.503390  |
| C | -0.461415  | 1.523511  | 0.407834  |
| C | 0.966846   | 1.231260  | 0.384718  |
| C | -0.870232  | 2.862858  | 0.322934  |
| C | -2.247324  | 3.156535  | 0.350979  |
| C | -3.182753  | 2.165306  | 0.429759  |
| C | -2.814524  | 0.797761  | 0.487515  |
| N | -3.765551  | -0.174479 | 0.579355  |
| C | -5.137307  | -0.070691 | 0.313966  |
| C | -6.025265  | -0.805751 | 1.103077  |
| C | -7.385746  | -0.781409 | 0.840278  |
| C | -7.911401  | -0.017488 | -0.202357 |
| C | -7.015614  | 0.709012  | -0.986461 |
| C | -5.649431  | 0.680355  | -0.746953 |
| C | -9.384265  | -0.022910 | -0.503824 |
| C | -9.794414  | -1.150782 | -1.455463 |
| C | -11.286055 | -1.153956 | -1.756296 |
| O | 1.786667   | 2.186363  | 0.323469  |

|   |            |           |           |
|---|------------|-----------|-----------|
| O | -1.793142  | -1.833414 | 0.792722  |
| C | 9.289712   | 0.135954  | -1.173047 |
| C | 10.049633  | -0.824044 | -0.252969 |
| C | 11.528929  | -0.920899 | -0.596031 |
| O | 0.021158   | -3.541824 | 0.801717  |
| H | 2.530559   | -3.852603 | 0.730777  |
| H | 4.219278   | -2.085582 | 0.471606  |
| H | 5.673877   | 1.963147  | 1.157707  |
| H | 4.841433   | -1.220514 | -1.586450 |
| H | 7.225310   | -1.354346 | -2.150758 |
| H | 8.055785   | 1.871861  | 0.534577  |
| O | -0.031344  | 3.887940  | 0.231237  |
| H | -2.539830  | 4.200333  | 0.323162  |
| H | -4.233067  | 2.424570  | 0.480019  |
| H | -4.974016  | 1.222148  | -1.399784 |
| H | -7.393138  | 1.301109  | -1.815645 |
| H | -8.057365  | -1.358182 | 1.470248  |
| H | -5.636158  | -1.387344 | 1.932808  |
| H | 9.749031   | 1.129684  | -1.111357 |
| H | 12.049686  | -1.611272 | 0.073054  |
| H | 11.675433  | -1.277419 | -1.620837 |
| H | 12.019350  | 0.054573  | -0.513825 |
| H | 9.407300   | -0.195435 | -2.211707 |
| H | 9.925898   | -0.494079 | 0.785208  |
| H | 9.585035   | -1.815375 | -0.312260 |
| H | -9.223890  | -1.055320 | -2.386722 |
| H | -9.498007  | -2.110977 | -1.017268 |
| H | -11.554241 | -1.966911 | -2.436478 |
| H | -11.874516 | -1.278514 | -0.841425 |
| H | -11.598081 | -0.213960 | -2.223048 |
| H | -9.950242  | -0.119597 | 0.430424  |
| H | -9.673351  | 0.939280  | -0.942812 |
| H | 3.368533   | 1.445786  | 0.278658  |
| H | -3.381385  | -1.097796 | 0.773890  |
| H | -0.884251  | -3.135490 | 0.834181  |
| H | 0.876174   | 3.485367  | 0.246401  |

3e

|   |           |           |           |
|---|-----------|-----------|-----------|
| C | -5.561456 | -0.848460 | 0.781708  |
| C | -5.123790 | 0.012940  | -0.227615 |
| C | -6.072293 | 0.777327  | -0.911432 |
| C | -7.418418 | 0.673176  | -0.598604 |
| C | -7.869917 | -0.201426 | 0.390332  |
| C | -6.914044 | -0.955777 | 1.070369  |
| N | -3.770118 | 0.195052  | -0.538264 |
| C | -2.779215 | -0.740749 | -0.568280 |
| C | -1.412519 | -0.367946 | -0.619826 |
| C | -0.399389 | -1.372854 | -0.648022 |
| C | -0.752703 | -2.730560 | -0.651175 |
| C | -2.117372 | -3.077808 | -0.645045 |
| C | -3.092084 | -2.122753 | -0.605398 |
| C | 1.016257  | -1.024409 | -0.664669 |
| C | 1.412480  | 0.367797  | -0.619860 |
| C | 0.399358  | 1.372716  | -0.648073 |
| C | -1.016302 | 1.024267  | -0.664658 |
| C | 0.752688  | 2.730418  | -0.651361 |
| C | 2.117352  | 3.077660  | -0.645135 |
| C | 3.092062  | 2.122606  | -0.605404 |
| C | 2.779187  | 0.740603  | -0.568251 |
| N | 3.770099  | -0.195179 | -0.538173 |
| C | 5.123782  | -0.013017 | -0.227594 |

|   |            |           |           |
|---|------------|-----------|-----------|
| C | 6.072292   | -0.777372 | -0.911434 |
| C | 7.418424   | -0.673169 | -0.598651 |
| C | 7.869928   | 0.201470  | 0.390249  |
| C | 6.914046   | 0.955793  | 1.070309  |
| C | 5.561450   | 0.848409  | 0.781707  |
| C | 9.327788   | 0.287009  | 0.747192  |
| C | 9.737148   | -0.715267 | 1.830498  |
| C | 11.212921  | -0.624016 | 2.189958  |
| O | -1.874222  | 1.945871  | -0.713674 |
| O | 1.874155   | -1.946073 | -0.713352 |
| C | -9.327766  | -0.286839 | 0.747356  |
| C | -9.737060  | 0.715751  | 1.830392  |
| C | -11.212824 | 0.624624  | 2.189929  |
| O | 0.128065   | -3.723866 | -0.675897 |
| H | -2.368753  | -4.131712 | -0.688779 |
| H | -4.132830  | -2.420711 | -0.633368 |
| H | -5.742003  | 1.445456  | -1.700517 |
| H | -4.839416  | -1.416448 | 1.357868  |
| H | -7.232260  | -1.634676 | 1.856892  |
| H | -8.137502  | 1.274621  | -1.147945 |
| O | -0.128053  | 3.723747  | -0.676321 |
| H | 2.368745   | 4.131562  | -0.688881 |
| H | 4.132808   | 2.420566  | -0.633348 |
| H | 4.839408   | 1.416348  | 1.357912  |
| H | 7.232263   | 1.634729  | 1.856800  |
| H | 8.137497   | -1.274630 | -1.147989 |
| H | 5.742006   | -1.445500 | -1.700523 |
| H | -9.936017  | -0.114295 | -0.148599 |
| H | -11.480354 | 1.348911  | 2.964068  |
| H | -11.845983 | 0.820974  | 1.318519  |
| H | -11.468476 | -0.371832 | 2.564772  |
| H | -9.563147  | -1.301162 | 1.090806  |
| H | -9.122476  | 0.545976  | 2.722225  |
| H | -9.496545  | 1.728538  | 1.486446  |
| H | 9.122593   | -0.545261 | 2.722308  |
| H | 9.496637   | -1.728151 | 1.486836  |
| H | 11.480486  | -1.348092 | 2.964283  |
| H | 11.846054  | -0.820590 | 1.318579  |
| H | 11.468572  | 0.372544  | 2.564526  |
| H | 9.936003   | 0.114210  | -0.148737 |
| H | 9.563161   | 1.301437  | 1.090334  |
| H | -3.431729  | 1.145848  | -0.677288 |
| H | 3.431752   | -1.145980 | -0.677275 |
| H | 1.017939   | -3.283944 | -0.698653 |
| H | -1.017925  | 3.283855  | -0.699344 |

3f

|   |           |           |           |
|---|-----------|-----------|-----------|
| C | 5.584150  | -0.333716 | -1.039583 |
| C | 5.095156  | 0.474801  | -0.009886 |
| C | 5.985547  | 1.319439  | 0.656915  |
| C | 7.327246  | 1.342843  | 0.309514  |
| C | 7.831994  | 0.520868  | -0.698383 |
| C | 6.932609  | -0.312833 | -1.363163 |
| N | 3.737399  | 0.532935  | 0.329726  |
| C | 2.834044  | -0.488074 | 0.357735  |
| C | 1.439893  | -0.239554 | 0.419549  |
| C | 0.521097  | -1.331222 | 0.448304  |
| C | 0.994910  | -2.651740 | 0.442770  |
| C | 2.385126  | -2.875344 | 0.422642  |
| C | 3.269975  | -1.836576 | 0.381457  |
| C | -0.920112 | -1.111348 | 0.470163  |

|    |            |           |           |
|----|------------|-----------|-----------|
| C  | -1.439900  | 0.239516  | 0.419586  |
| C  | -0.521102  | 1.331182  | 0.448332  |
| C  | 0.920101   | 1.111302  | 0.470151  |
| C  | -0.994917  | 2.651704  | 0.442818  |
| C  | -2.385135  | 2.875305  | 0.422718  |
| C  | -3.269982  | 1.836536  | 0.381541  |
| C  | -2.834048  | 0.488034  | 0.357806  |
| N  | -3.737410  | -0.532971 | 0.329819  |
| C  | -5.095164  | -0.474820 | -0.009813 |
| C  | -5.985583  | -1.319421 | 0.656995  |
| C  | -7.327278  | -1.342803 | 0.309573  |
| C  | -7.831988  | -0.520844 | -0.698355 |
| C  | -6.932575  | 0.312824  | -1.363140 |
| C  | -5.584123  | 0.333686  | -1.039536 |
| C  | -9.297187  | -0.507948 | -1.033951 |
| C  | -10.088615 | 0.518893  | -0.218461 |
| C  | -11.569773 | 0.531730  | -0.567121 |
| O  | 1.691601   | 2.105884  | 0.524518  |
| O  | -1.691607  | -2.105921 | 0.524541  |
| C  | 9.297199   | 0.507989  | -1.033943 |
| C  | 10.088636  | -0.518770 | -0.218359 |
| C  | 11.569802  | -0.531592 | -0.566989 |
| O  | 0.207051   | -3.720161 | 0.469588  |
| H  | 2.730021   | -3.902818 | 0.456752  |
| H  | 4.333642   | -2.039548 | 0.397423  |
| H  | 5.613110   | 1.955860  | 1.453428  |
| H  | 4.900626   | -0.953734 | -1.609031 |
| H  | 7.290437   | -0.943637 | -2.172431 |
| H  | 7.999520   | 2.012832  | 0.838285  |
| O  | -0.207054  | 3.720118  | 0.469630  |
| H  | -2.730030  | 3.902779  | 0.456846  |
| H  | -4.333650  | 2.039504  | 0.397523  |
| H  | -4.900572  | 0.953684  | -1.608976 |
| H  | -7.290379  | 0.943617  | -2.172427 |
| H  | -7.999579  | -2.012757 | 0.838354  |
| H  | -5.613172  | -1.955830 | 1.453529  |
| H  | 9.722127   | 1.504427  | -0.864458 |
| H  | 12.113535  | -1.270877 | 0.027414  |
| H  | 11.725896  | -0.774638 | -1.623076 |
| H  | 12.028796  | 0.445208  | -0.382683 |
| H  | 9.426972   | 0.293258  | -2.101470 |
| H  | 9.956136   | -0.304202 | 0.848572  |
| H  | 9.656020   | -1.512679 | -0.382790 |
| H  | -9.956143  | 0.304401  | 0.848489  |
| H  | -9.655967  | 1.512777  | -0.382956 |
| H  | -12.113495 | 1.271078  | 0.027214  |
| H  | -11.725840 | 0.774698  | -1.623230 |
| H  | -12.028801 | -0.445042 | -0.382747 |
| H  | -9.722142  | -1.504363 | -0.864404 |
| H  | -9.426928  | -0.293289 | -2.101497 |
| H  | 3.316945   | 1.448914  | 0.477658  |
| H  | -3.316962  | -1.448957 | 0.477714  |
| H  | 0.718518   | 3.362171  | 0.501318  |
| H  | -0.718514  | -3.362227 | 0.501289  |
| 4a |            |           |           |
| C  | 7.939158   | 0.240350  | 0.414392  |
| C  | 7.384358   | -0.934176 | 0.923036  |
| C  | 6.026495   | -1.193139 | 0.814100  |
| C  | 5.169548   | -0.279660 | 0.193415  |
| C  | 5.723197   | 0.899945  | -0.312669 |

|    |            |           |           |
|----|------------|-----------|-----------|
| C  | 7.082326   | 1.150817  | -0.204899 |
| C  | 3.722708   | -0.548473 | 0.081691  |
| C  | 3.246142   | -1.847295 | -0.153148 |
| C  | 1.891063   | -2.103699 | -0.255765 |
| C  | 0.966397   | -1.068740 | -0.130516 |
| C  | 1.426579   | 0.233989  | 0.100147  |
| C  | 2.790132   | 0.481861  | 0.206087  |
| C  | 0.480176   | 1.372711  | 0.246782  |
| C  | -0.966398  | 1.068719  | 0.130648  |
| C  | -1.426580  | -0.234010 | -0.100015 |
| C  | -0.480179  | -1.372740 | -0.246603 |
| C  | -2.790131  | -0.481875 | -0.205996 |
| C  | -3.722706  | 0.548466  | -0.081642 |
| C  | -3.246139  | 1.847288  | 0.153197  |
| C  | -1.891062  | 2.103686  | 0.255855  |
| O  | 0.877373   | 2.503575  | 0.449943  |
| O  | -0.877372  | -2.503590 | -0.449844 |
| C  | -5.169542  | 0.279659  | -0.193409 |
| C  | -5.723214  | -0.899936 | 0.312671  |
| C  | -7.082341  | -1.150803 | 0.204861  |
| C  | -7.939149  | -0.240339 | -0.414469 |
| C  | -7.384326  | 0.934178  | -0.923109 |
| C  | -6.026466  | 1.193135  | -0.814133 |
| C  | -9.417935  | -0.497430 | -0.491883 |
| C  | -10.178050 | 0.038049  | 0.725456  |
| C  | -11.674424 | -0.226586 | 0.646249  |
| C  | 9.417945   | 0.497447  | 0.491762  |
| C  | 10.178025  | -0.038024 | -0.725603 |
| C  | 11.674401  | 0.226617  | -0.646441 |
| H  | 1.518167   | -3.104189 | -0.444846 |
| H  | 3.955184   | -2.658655 | -0.280173 |
| H  | 3.103805   | 1.499910  | 0.409399  |
| H  | -1.518166  | 3.104175  | 0.444938  |
| H  | -3.103803  | -1.499925 | -0.409305 |
| H  | -3.955181  | 2.658653  | 0.280190  |
| H  | -5.619826  | 2.101734  | -1.246764 |
| H  | -8.026009  | 1.652470  | -1.425920 |
| H  | -7.488178  | -2.073198 | 0.610990  |
| H  | -5.084095  | -1.619527 | 0.814104  |
| H  | 5.084057   | 1.619538  | -0.814072 |
| H  | 7.488145   | 2.073219  | -0.611030 |
| H  | 8.026060   | -1.652471 | 1.425817  |
| H  | 5.619874   | -2.101745 | 1.246733  |
| H  | 9.824024   | 0.035857  | 1.399516  |
| H  | 9.599225   | 1.574960  | 0.581996  |
| H  | 9.991418   | -1.114485 | -0.816102 |
| H  | 9.763852   | 0.417967  | -1.632413 |
| H  | 12.195225  | -0.163888 | -1.524880 |
| H  | 11.884162  | 1.299405  | -0.585429 |
| H  | 12.114121  | -0.245863 | 0.237915  |
| H  | -9.823983  | -0.035842 | -1.399652 |
| H  | -9.599216  | -1.574943 | -0.582119 |
| H  | -9.763907  | -0.417940 | 1.632281  |
| H  | -9.991441  | 1.114509  | 0.815956  |
| H  | -12.195274 | 0.163925  | 1.524670  |
| H  | -12.114116 | 0.245892  | -0.238123 |
| H  | -11.884188 | -1.299373 | 0.585234  |
| 4b |            |           |           |
| C  | 6.048893   | 1.411675  | 0.453341  |
| C  | 5.184617   | 0.534887  | -0.208781 |

|   |            |           |           |
|---|------------|-----------|-----------|
| C | 5.742659   | -0.570044 | -0.858439 |
| C | 7.112159   | -0.785465 | -0.846075 |
| C | 7.975903   | 0.087292  | -0.183560 |
| C | 7.417214   | 1.188342  | 0.465812  |
| C | 3.727634   | 0.769508  | -0.224659 |
| C | 2.829320   | -0.296556 | -0.165546 |
| C | 1.456183   | -0.081295 | -0.179928 |
| C | 0.951501   | 1.223469  | -0.249661 |
| C | 1.841675   | 2.293923  | -0.309443 |
| C | 3.206323   | 2.070187  | -0.299250 |
| C | 0.547771   | -1.257688 | -0.110118 |
| C | -0.910251  | -0.987818 | -0.123186 |
| C | -1.414848  | 0.317049  | -0.191419 |
| C | -0.506458  | 1.493358  | -0.262416 |
| C | -2.787957  | 0.532635  | -0.203274 |
| C | -3.686265  | -0.533324 | -0.143532 |
| C | -3.165172  | -1.834275 | -0.072469 |
| C | -1.800527  | -2.058272 | -0.064185 |
| C | -5.143359  | -0.299077 | -0.153230 |
| C | -6.009179  | -1.169801 | -0.821403 |
| C | -7.377029  | -0.943492 | -0.832691 |
| C | -7.933705  | 0.154066  | -0.175429 |
| C | -7.068110  | 1.021975  | 0.490772  |
| C | -5.698994  | 0.803973  | 0.501438  |
| C | -9.420789  | 0.369529  | -0.149828 |
| C | -10.101645 | -0.333674 | 1.028600  |
| C | -11.607848 | -0.119076 | 1.050496  |
| O | -0.942169  | 2.626497  | -0.325042 |
| O | 0.983460   | -2.390859 | -0.047777 |
| C | 9.454724   | -0.175118 | -0.131280 |
| C | 9.862877   | -1.030263 | 1.072398  |
| C | 11.360925  | -1.292103 | 1.124747  |
| H | -1.393226  | -3.061245 | -0.001271 |
| H | -3.845842  | -2.675919 | 0.001751  |
| H | -3.137748  | 1.556226  | -0.281202 |
| H | 1.434298   | 3.296749  | -0.374140 |
| H | 3.179170   | -1.320015 | -0.086034 |
| H | 3.886670   | 2.911980  | -0.374242 |
| H | 5.642809   | 2.265451  | 0.986451  |
| H | 8.066313   | 1.881830  | 0.993371  |
| H | 7.521619   | -1.643595 | -1.371824 |
| H | 5.098514   | -1.252640 | -1.403382 |
| H | -5.052418  | 1.487769  | 1.041983  |
| H | -7.474537  | 1.884447  | 1.011686  |
| H | -8.026285  | -1.625774 | -1.374472 |
| H | -5.603630  | -2.015829 | -1.367174 |
| H | -9.860483  | 0.006530  | -1.086268 |
| H | -9.636141  | 1.443283  | -0.099828 |
| H | -9.875973  | -1.405447 | 0.981587  |
| H | -9.657486  | 0.027861  | 1.963356  |
| H | -12.070734 | -0.629442 | 1.899434  |
| H | -11.855747 | 0.944603  | 1.127168  |
| H | -12.075951 | -0.501407 | 0.137574  |
| H | 9.996191   | 0.777459  | -0.093911 |
| H | 9.771520   | -0.678143 | -1.052437 |
| H | 9.537077   | -0.529225 | 1.991425  |
| H | 9.316411   | -1.979817 | 1.035835  |
| H | 11.629024  | -1.901870 | 1.991752  |
| H | 11.702349  | -1.820425 | 0.228661  |
| H | 11.924450  | -0.355659 | 1.189900  |



|    |            |           |           |
|----|------------|-----------|-----------|
| 4c |            |           |           |
| C  | -6.006232  | 1.486910  | -0.381771 |
| C  | -5.138516  | 0.601829  | 0.264648  |
| C  | -5.698773  | -0.463072 | 0.976396  |
| C  | -7.073311  | -0.632356 | 1.038250  |
| C  | -7.940626  | 0.248158  | 0.390808  |
| C  | -7.379991  | 1.309635  | -0.319867 |
| C  | -3.675602  | 0.785632  | 0.200133  |
| C  | -2.818418  | -0.313357 | 0.133396  |
| C  | -1.439883  | -0.147357 | 0.071992  |
| C  | -0.887793  | 1.140039  | 0.070643  |
| C  | -1.736671  | 2.243184  | 0.137038  |
| C  | -3.106931  | 2.068522  | 0.203129  |
| C  | -0.577270  | -1.357471 | -0.002007 |
| C  | 0.887800   | -1.140090 | -0.070598 |
| C  | 1.439890   | 0.147307  | -0.071943 |
| C  | 0.577276   | 1.357421  | 0.002044  |
| C  | 2.818425   | 0.313307  | -0.133343 |
| C  | 3.675610   | -0.785681 | -0.200083 |
| C  | 3.106940   | -2.068571 | -0.203089 |
| C  | 1.736679   | -2.243234 | -0.136998 |
| C  | 5.138522   | -0.601870 | -0.264611 |
| C  | 6.006252   | -1.486969 | 0.381769  |
| C  | 7.380008   | -1.309686 | 0.319849  |
| C  | 7.940628   | -0.248179 | -0.390796 |
| C  | 7.073300   | 0.632354  | -1.038191 |
| C  | 5.698762   | 0.463057  | -0.976327 |
| C  | 9.427788   | -0.033327 | -0.419200 |
| C  | 9.922009   | 0.847833  | 0.732330  |
| C  | 11.428261  | 1.061772  | 0.702498  |
| O  | 1.054351   | 2.475553  | 0.003245  |
| O  | -1.054345  | -2.475603 | -0.003224 |
| C  | -9.427789  | 0.033319  | 0.419194  |
| C  | -9.922033  | -0.847635 | -0.732483 |
| C  | -11.428296 | -1.061511 | -0.702709 |
| H  | 1.292434   | -3.232357 | -0.146125 |
| H  | 3.753370   | -2.936249 | -0.282786 |
| H  | 3.206567   | 1.325603  | -0.106383 |
| H  | -1.292426  | 3.232308  | 0.146156  |
| H  | -3.206560  | -1.325653 | 0.106431  |
| H  | -3.753362  | 2.936201  | 0.282818  |
| H  | -5.600071  | 2.310010  | -0.961117 |
| H  | -8.032004  | 2.008307  | -0.836868 |
| H  | -7.483350  | -1.459673 | 1.610842  |
| H  | -5.050593  | -1.150125 | 1.510828  |
| H  | 5.050574   | 1.150128  | -1.510727 |
| H  | 7.483321   | 1.459697  | -1.610760 |
| H  | 8.032036   | -2.008368 | 0.836816  |
| H  | 5.600099   | -2.310088 | 0.961093  |
| H  | 9.940337   | -1.001459 | -0.374810 |
| H  | 9.714000   | 0.427894  | -1.371713 |
| H  | 9.404510   | 1.813201  | 0.689164  |
| H  | 9.627057   | 0.389030  | 1.683246  |
| H  | 11.758082  | 1.690603  | 1.533867  |
| H  | 11.964774  | 0.109931  | 0.772426  |
| H  | 11.741046  | 1.548809  | -0.226820 |
| H  | -9.940327  | 1.001466  | 0.374977  |
| H  | -9.713996  | -0.428062 | 1.371630  |
| H  | -9.627047  | -0.388697 | -1.683323 |
| H  | -9.404577  | -1.813033 | -0.689459 |
| H  | -11.758128 | -1.690210 | -1.534172 |

|   |            |           |           |
|---|------------|-----------|-----------|
| H | -11.741121 | -1.548663 | 0.226534  |
| H | -11.964764 | -0.109636 | -0.772515 |

4d

|   |            |           |           |
|---|------------|-----------|-----------|
| C | -5.977604  | -1.181803 | -0.929917 |
| C | -5.139639  | -0.306380 | -0.233084 |
| C | -5.722195  | 0.798605  | 0.394557  |
| C | -7.090209  | 1.013759  | 0.330525  |
| C | -7.928181  | 0.140559  | -0.363535 |
| C | -7.344613  | -0.958680 | -0.994103 |
| C | -3.683661  | -0.537484 | -0.163851 |
| C | -2.786340  | 0.530810  | -0.185629 |
| C | -1.414613  | 0.319288  | -0.111969 |
| C | -0.909795  | -0.984099 | -0.020332 |
| C | -1.798821  | -2.057052 | -0.001480 |
| C | -3.162446  | -1.836983 | -0.070023 |
| C | -0.507636  | 1.498481  | -0.141364 |
| C | 0.948723   | 1.233417  | -0.056919 |
| C | 1.453143   | -0.069359 | 0.045224  |
| C | 0.546706   | -1.249236 | 0.062722  |
| C | 2.824640   | -0.280375 | 0.124219  |
| C | 3.721573   | 0.788474  | 0.111864  |
| C | 3.200307   | 2.087588  | 0.012551  |
| C | 1.837539   | 2.306545  | -0.073393 |
| C | 5.176455   | 0.558240  | 0.203566  |
| C | 6.080745   | 1.365494  | -0.492705 |
| C | 7.447075   | 1.148668  | -0.399051 |
| C | 7.963543   | 0.123418  | 0.393579  |
| C | 7.059738   | -0.680962 | 1.088405  |
| C | 5.692526   | -0.471629 | 0.995855  |
| C | 9.442376   | -0.135560 | 0.461300  |
| C | 9.921875   | -1.122857 | -0.607339 |
| C | 11.419368  | -1.383381 | -0.535549 |
| O | 0.982751   | -2.381036 | 0.144733  |
| O | -0.943518  | 2.630018  | -0.227711 |
| C | -9.415761  | 0.352117  | -0.392819 |
| C | -10.135301 | -0.340111 | 0.768989  |
| C | -11.641593 | -0.127468 | 0.737792  |
| H | 1.429987   | 3.309014  | -0.142463 |
| H | 3.877874   | 2.934799  | 0.028568  |
| H | 3.175205   | -1.305316 | 0.176399  |
| H | -1.391933  | -3.058874 | 0.079845  |
| H | -3.134904  | 1.553444  | -0.279622 |
| H | -3.843180  | -2.680664 | -0.025177 |
| H | -5.550068  | -2.029463 | -1.455993 |
| H | -7.971410  | -1.645164 | -1.556592 |
| H | -7.517849  | 1.877722  | 0.831629  |
| H | -5.098361  | 1.486066  | 0.956703  |
| H | 5.015878   | -1.096890 | 1.569392  |
| H | 7.435312   | -1.478288 | 1.723699  |
| H | 8.128204   | 1.786911  | -0.955166 |
| H | 5.709143   | 2.157799  | -1.134745 |
| H | 9.986902   | 0.809046  | 0.346899  |
| H | 9.701213   | -0.526711 | 1.452248  |
| H | 9.371343   | -2.064096 | -0.494997 |
| H | 9.655654   | -0.733156 | -1.596762 |
| H | 11.738525  | -2.089116 | -1.307198 |
| H | 11.989478  | -0.459012 | -0.674250 |
| H | 11.702409  | -1.802504 | 0.435499  |
| H | -9.821767  | -0.022132 | -1.339966 |
| H | -9.635437  | 1.425759  | -0.361965 |

|   |            |           |           |
|---|------------|-----------|-----------|
| H | -9.906953  | -1.411965 | 0.740522  |
| H | -9.723151  | 0.031588  | 1.714362  |
| H | -12.132449 | -0.630213 | 1.575493  |
| H | -11.893043 | 0.936562  | 0.795665  |
| H | -12.078015 | -0.519289 | -0.186728 |

4e

|   |            |           |           |
|---|------------|-----------|-----------|
| C | -5.985993  | 1.476756  | 0.520008  |
| C | -5.145476  | 0.601675  | -0.174356 |
| C | -5.734808  | -0.453111 | -0.877642 |
| C | -7.110707  | -0.622496 | -0.884967 |
| C | -7.950686  | 0.248542  | -0.190634 |
| C | -7.361158  | 1.300073  | 0.511596  |
| C | -3.681183  | 0.785789  | -0.169741 |
| C | -2.821456  | -0.313336 | -0.165580 |
| C | -1.441629  | -0.147214 | -0.165776 |
| C | -0.890143  | 1.140434  | -0.162119 |
| C | -1.741383  | 2.243746  | -0.164008 |
| C | -3.113212  | 2.069026  | -0.170623 |
| C | -0.576485  | -1.357808 | -0.161250 |
| C | 0.890151   | -1.140489 | -0.162096 |
| C | 1.441636   | 0.147159  | -0.165737 |
| C | 0.576492   | 1.357754  | -0.161245 |
| C | 2.821465   | 0.313279  | -0.165505 |
| C | 3.681187   | -0.785849 | -0.169649 |
| C | 3.113217   | -2.069088 | -0.170538 |
| C | 1.741387   | -2.243804 | -0.163960 |
| C | 5.145483   | -0.601741 | -0.174236 |
| C | 5.985982   | -1.476810 | 0.520163  |
| C | 7.361151   | -1.300138 | 0.511760  |
| C | 7.950692   | -0.248638 | -0.190502 |
| C | 7.110731   | 0.622388  | -0.884872 |
| C | 5.734830   | 0.453016  | -0.877556 |
| C | 9.437900   | -0.034323 | -0.162234 |
| C | 9.888351   | 0.847009  | 1.006969  |
| C | 11.394413  | 1.062956  | 1.032002  |
| O | 1.053049   | 2.476122  | -0.159668 |
| O | -1.053040  | -2.476176 | -0.159721 |
| C | -9.437894  | 0.034232  | -0.162358 |
| C | -9.888390  | -0.846615 | 1.007204  |
| C | -11.394454 | -1.062531 | 1.032289  |
| H | 1.298270   | -3.233445 | -0.171926 |
| H | 3.762460   | -2.937774 | -0.201659 |
| H | 3.207404   | 1.326500  | -0.142542 |
| H | -1.298274  | 3.233390  | -0.171969 |
| H | -3.207386  | -1.326560 | -0.142623 |
| H | -3.762448  | 2.937717  | -0.201781 |
| H | -5.556536  | 2.291448  | 1.094375  |
| H | -7.991231  | 1.991385  | 1.064485  |
| H | -7.544002  | -1.441810 | -1.451897 |
| H | -5.109635  | -1.131682 | -1.448957 |
| H | 5.109664   | 1.131573  | -1.448894 |
| H | 7.544041   | 1.441674  | -1.451831 |
| H | 7.991216   | -1.991431 | 1.064680  |
| H | 5.556506   | -2.291489 | 1.094534  |
| H | 9.948375   | -1.002479 | -0.098213 |
| H | 9.760036   | 0.426618  | -1.103361 |
| H | 9.371359   | 1.811641  | 0.945256  |
| H | 9.559542   | 0.387339  | 1.946313  |
| H | 11.693201  | 1.691074  | 1.875550  |
| H | 11.929396  | 0.111731  | 1.119823  |

|   |            |           |           |
|---|------------|-----------|-----------|
| H | 11.739738  | 1.551746  | 0.115213  |
| H | -9.948379  | 1.002411  | -0.098759 |
| H | -9.759983  | -0.427112 | -1.103300 |
| H | -9.371402  | -1.811274 | 0.945894  |
| H | -9.559597  | -0.386556 | 1.946363  |
| H | -11.693270 | -1.690300 | 1.876088  |
| H | -11.929425 | -0.111263 | 1.119711  |
| H | -11.739766 | -1.551689 | 0.115693  |

4f

|   |            |           |           |
|---|------------|-----------|-----------|
| C | 6.065324   | 1.045650  | -0.886076 |
| C | 5.176284   | 0.234650  | -0.174535 |
| C | 5.700617   | -0.855616 | 0.525912  |
| C | 7.061982   | -1.117920 | 0.517922  |
| C | 7.950717   | -0.308537 | -0.190312 |
| C | 7.425168   | 0.775605  | -0.893665 |
| C | 3.728132   | 0.518967  | -0.167112 |
| C | 2.791939   | -0.515647 | -0.161919 |
| C | 1.427398   | -0.250535 | -0.154728 |
| C | 0.970154   | 1.073366  | -0.158174 |
| C | 1.898334   | 2.112769  | -0.162556 |
| C | 3.253936   | 1.839699  | -0.164771 |
| C | 0.477191   | -1.395590 | -0.154314 |
| C | -0.970146  | -1.073365 | -0.158186 |
| C | -1.427391  | 0.250537  | -0.154734 |
| C | -0.477182  | 1.395589  | -0.154312 |
| C | -2.791930  | 0.515649  | -0.161922 |
| C | -3.728122  | -0.518971 | -0.167107 |
| C | -3.253928  | -1.839700 | -0.164775 |
| C | -1.898324  | -2.112769 | -0.162570 |
| C | -5.176279  | -0.234651 | -0.174529 |
| C | -6.065318  | -1.045665 | -0.886050 |
| C | -7.425170  | -0.775633 | -0.893623 |
| C | -7.950715  | 0.308512  | -0.190284 |
| C | -7.061976  | 1.117925  | 0.517916  |
| C | -5.700611  | 0.855630  | 0.525903  |
| C | -9.430424  | 0.569533  | -0.161194 |
| C | -10.137124 | -0.152821 | 0.990122  |
| C | -11.635997 | 0.108000  | 1.015743  |
| O | -0.871953  | 2.545349  | -0.150548 |
| O | 0.871961   | -2.545349 | -0.150513 |
| C | 9.430426   | -0.569545 | -0.161233 |
| C | 10.137087  | 0.152804  | 0.990125  |
| C | 11.635963  | -0.107947 | 1.015804  |
| H | -1.527422  | -3.131674 | -0.153821 |
| H | -3.964442  | -2.659306 | -0.140744 |
| H | -3.104303  | 1.553970  | -0.184360 |
| H | 1.527434   | 3.131675  | -0.153776 |
| H | 3.104305   | -1.553972 | -0.184354 |
| H | 3.964450   | 2.659305  | -0.140743 |
| H | 5.683513   | 1.878729  | -1.467668 |
| H | 8.092451   | 1.411682  | -1.468700 |
| H | 7.444009   | -1.969111 | 1.074708  |
| H | 5.036365   | -1.493309 | 1.100310  |
| H | -5.036354  | 1.493330  | 1.100287  |
| H | -7.444003  | 1.969146  | 1.074655  |
| H | -8.092451  | -1.411734 | -1.468636 |
| H | -5.683507  | -1.878746 | -1.467638 |
| H | -9.877561  | 0.253284  | -1.110964 |
| H | -9.612293  | 1.647097  | -0.073992 |
| H | -9.944933  | -1.228837 | 0.906156  |

|   |            |           |           |
|---|------------|-----------|-----------|
| H | -9.685250  | 0.161812  | 1.938034  |
| H | -12.117554 | -0.416491 | 1.845475  |
| H | -11.850758 | 1.175654  | 1.128322  |
| H | -12.112527 | -0.228059 | 0.089085  |
| H | 9.877563   | -0.253249 | -1.110984 |
| H | 9.612316   | -1.647104 | -0.074051 |
| H | 9.944846   | 1.228813  | 0.906170  |
| H | 9.685181   | -0.161871 | 1.938007  |
| H | 12.117448  | 0.416539  | 1.845582  |
| H | 11.850784  | -1.175592 | 1.128355  |
| H | 12.112529  | 0.228172  | 0.089185  |

5a

|   |            |           |           |
|---|------------|-----------|-----------|
| C | -6.009138  | 1.041135  | -0.942760 |
| C | -5.200131  | 0.175666  | -0.199507 |
| C | -5.813071  | -0.902110 | 0.447574  |
| C | -7.183919  | -1.088999 | 0.364134  |
| C | -7.993463  | -0.224224 | -0.373173 |
| C | -7.378597  | 0.842094  | -1.028711 |
| C | -3.751647  | 0.439048  | -0.089552 |
| C | -2.790570  | -0.600390 | -0.171246 |
| C | -1.414338  | -0.297855 | -0.084877 |
| C | -0.996649  | 1.037188  | 0.083944  |
| C | -1.935247  | 2.049548  | 0.165939  |
| C | -3.288799  | 1.739977  | 0.080471  |
| C | -0.436004  | -1.377392 | -0.181040 |
| C | 0.996649   | -1.037185 | -0.083967 |
| C | 1.414338   | 0.297857  | 0.084855  |
| C | 0.436004   | 1.377395  | 0.181010  |
| C | 2.790570   | 0.600392  | 0.171231  |
| C | 3.751647   | -0.439046 | 0.089542  |
| C | 3.288798   | -1.739976 | -0.080484 |
| C | 1.935247   | -2.049546 | -0.165958 |
| C | 5.200130   | -0.175665 | 0.199506  |
| C | 6.009131   | -1.041134 | 0.942763  |
| C | 7.378591   | -0.842095 | 1.028723  |
| C | 7.993462   | 0.224222  | 0.373189  |
| C | 7.183923   | 1.088998  | -0.364124 |
| C | 5.813075   | 0.902109  | -0.447572 |
| C | 9.483472   | 0.412589  | 0.426031  |
| C | 10.212227  | -0.311301 | -0.710400 |
| C | 11.721182  | -0.123677 | -0.654826 |
| O | 0.786432   | 2.553100  | 0.337572  |
| O | -0.786432  | -2.553097 | -0.337597 |
| C | -9.483474  | -0.412592 | -0.426006 |
| C | -10.212222 | 0.311296  | 0.710431  |
| C | -11.721177 | 0.123671  | 0.654866  |
| H | 1.596240   | -3.068621 | -0.306373 |
| H | 4.020326   | -2.536564 | -0.168437 |
| O | 3.207087   | 1.847158  | 0.342786  |
| H | -1.596240  | 3.068624  | 0.306352  |
| O | -3.207088  | -1.847157 | -0.342794 |
| H | -4.020327  | 2.536565  | 0.168428  |
| H | -5.554143  | 1.864185  | -1.485035 |
| H | -7.980700  | 1.520679  | -1.626618 |
| H | -7.636621  | -1.931516 | 0.879743  |
| H | -5.210344  | -1.595861 | 1.019524  |
| H | 5.210352   | 1.595861  | -1.019527 |
| H | 7.636629   | 1.931513  | -0.879731 |
| H | 7.980689   | -1.520680 | 1.626635  |
| H | 5.554132   | -1.864184 | 1.485036  |

|   |            |           |           |
|---|------------|-----------|-----------|
| H | 9.866600   | 0.048751  | 1.386683  |
| H | 9.721137   | 1.481908  | 0.380335  |
| H | 9.965110   | -1.378546 | -0.668110 |
| H | 9.823654   | 0.051121  | -1.669269 |
| H | 12.218798  | -0.648377 | -1.474941 |
| H | 11.991868  | 0.934889  | -0.725001 |
| H | 12.133687  | -0.507492 | 0.283957  |
| H | -9.866609  | -0.048752 | -1.386655 |
| H | -9.721138  | -1.481911 | -0.380310 |
| H | -9.823643  | -0.051128 | 1.669297  |
| H | -9.965106  | 1.378541  | 0.668141  |
| H | -12.218788 | 0.648370  | 1.474986  |
| H | -12.133688 | 0.507487  | -0.283913 |
| H | -11.991862 | -0.934895 | 0.725041  |
| H | 2.389012   | 2.408912  | 0.388703  |
| H | -2.389014  | -2.408912 | -0.388705 |

5b

|   |            |           |           |
|---|------------|-----------|-----------|
| C | -5.802290  | 0.781741  | 0.598518  |
| C | -5.180477  | -0.231495 | -0.138354 |
| C | -5.989977  | -1.079925 | -0.900487 |
| C | -7.367938  | -0.926909 | -0.918994 |
| C | -7.990735  | 0.074602  | -0.174985 |
| C | -7.180978  | 0.922416  | 0.581773  |
| C | -3.720376  | -0.447214 | -0.104820 |
| C | -2.800009  | 0.630019  | -0.161144 |
| C | -1.411715  | 0.373750  | -0.153136 |
| C | -0.941578  | -0.952730 | -0.085909 |
| C | -1.840369  | -2.002146 | -0.027356 |
| C | -3.206145  | -1.738056 | -0.036158 |
| C | -0.476158  | 1.492442  | -0.224002 |
| C | 0.970235   | 1.199729  | -0.212752 |
| C | 1.440378   | -0.126719 | -0.145015 |
| C | 0.504853   | -1.245306 | -0.072491 |
| C | 1.869030   | 2.248909  | -0.274949 |
| C | 3.234781   | 1.984622  | -0.270566 |
| C | 3.749114   | 0.693813  | -0.201618 |
| C | 2.828646   | -0.383085 | -0.139838 |
| C | 5.209146   | 0.476887  | -0.174637 |
| C | 6.024735   | 1.331390  | 0.574250  |
| C | 7.403099   | 1.182210  | 0.578431  |
| C | 8.020516   | 0.178312  | -0.166968 |
| C | 7.205003   | -0.674675 | -0.911360 |
| C | 5.825789   | -0.537590 | -0.914090 |
| C | 9.510991   | -0.010668 | -0.130441 |
| C | 9.962234   | -0.964271 | 0.980242  |
| C | 11.471714  | -1.153928 | 1.012992  |
| O | 0.901933   | -2.414596 | -0.004313 |
| O | -0.873206  | 2.661847  | -0.290107 |
| C | -9.487045  | 0.213042  | -0.157624 |
| C | -10.142468 | -0.577743 | 0.978854  |
| C | -11.657565 | -0.437622 | 0.994928  |
| H | -1.460910  | -3.014751 | 0.034371  |
| H | -3.905463  | -2.564872 | 0.032398  |
| O | -3.266340  | 1.868775  | -0.235302 |
| H | 1.489562   | 3.261493  | -0.336978 |
| O | 3.294998   | -1.621794 | -0.064370 |
| H | 3.933735   | 2.811314  | -0.343698 |
| H | 5.570307   | 2.110565  | 1.178295  |
| H | 8.011816   | 1.857359  | 1.173608  |
| H | 7.661195   | -1.461114 | -1.506398 |

|   |            |           |           |
|---|------------|-----------|-----------|
| H | 5.219897   | -1.215636 | -1.501364 |
| H | -5.200198  | 1.461514  | 1.187669  |
| H | -7.640323  | 1.714914  | 1.166247  |
| H | -7.971164  | -1.589738 | -1.533213 |
| H | -5.530170  | -1.851223 | -1.510548 |
| H | -9.898826  | -0.126798 | -1.115125 |
| H | -9.757243  | 1.271132  | -0.059944 |
| H | -9.864088  | -1.633817 | 0.883723  |
| H | -9.724292  | -0.239794 | 1.934222  |
| H | -12.102159 | -1.008468 | 1.814665  |
| H | -11.957365 | 0.608253  | 1.117336  |
| H | -12.098940 | -0.799467 | 0.060565  |
| H | 10.001580  | 0.959800  | 0.009606  |
| H | 9.855261   | -0.398094 | -1.096647 |
| H | 9.611335   | -0.578525 | 1.944489  |
| H | 9.464890   | -1.931375 | 0.842722  |
| H | 11.770804  | -1.835243 | 1.814119  |
| H | 11.839267  | -1.569463 | 0.069053  |
| H | 11.987128  | -0.201862 | 1.176554  |
| H | -2.471062  | 2.462389  | -0.280147 |
| H | 2.499700   | -2.215155 | -0.016594 |

5c

|   |            |           |           |
|---|------------|-----------|-----------|
| C | 5.792349   | 0.432809  | -1.026177 |
| C | 5.170689   | -0.552423 | -0.252148 |
| C | 5.985202   | -1.429757 | 0.471030  |
| C | 7.367053   | -1.329593 | 0.418565  |
| C | 7.988805   | -0.354079 | -0.360110 |
| C | 7.174467   | 0.520527  | -1.080394 |
| C | 3.703739   | -0.714309 | -0.214988 |
| C | 2.828977   | 0.397780  | -0.120995 |
| C | 1.433220   | 0.195334  | -0.061492 |
| C | 0.909728   | -1.112299 | -0.098275 |
| C | 1.763886   | -2.195792 | -0.193137 |
| C | 3.137651   | -1.984628 | -0.251456 |
| C | 0.545673   | 1.349605  | 0.045756  |
| C | -0.909880  | 1.112849  | 0.101762  |
| C | -1.433367  | -0.194786 | 0.065066  |
| C | -0.545806  | -1.349084 | -0.041755 |
| C | -1.764053  | 2.196400  | 0.195822  |
| C | -3.137871  | 1.985299  | 0.253076  |
| C | -3.703940  | 0.714978  | 0.216550  |
| C | -2.829156  | -0.397187 | 0.123873  |
| C | -5.170947  | 0.553206  | 0.251952  |
| C | -5.984287  | 1.429760  | -0.473441 |
| C | -7.366233  | 1.329710  | -0.422963 |
| C | -7.989204  | 0.355177  | 0.355915  |
| C | -7.176005  | -0.518657 | 1.078478  |
| C | -5.793810  | -0.431118 | 1.026190  |
| C | -9.485504  | 0.216614  | 0.376037  |
| C | -10.006950 | -0.743162 | -0.698068 |
| C | -11.521927 | -0.883639 | -0.674872 |
| O | -0.989972  | -2.502602 | -0.082141 |
| O | 0.989832   | 2.503112  | 0.086641  |
| C | 9.485061   | -0.215368 | -0.382309 |
| C | 10.008608  | 0.737746  | 0.696694  |
| C | 11.523442  | 0.879251  | 0.670691  |
| H | 1.343430   | -3.193265 | -0.230848 |
| H | 3.800466   | -2.838075 | -0.349404 |
| O | 3.345514   | 1.617931  | -0.076467 |
| H | -1.343584  | 3.193866  | 0.233545  |

|   |            |           |           |
|---|------------|-----------|-----------|
| O | -3.345717  | -1.617343 | 0.079679  |
| H | -3.800777  | 2.838785  | 0.350079  |
| H | -5.526327  | 2.186526  | -1.102812 |
| H | -7.973565  | 2.020172  | -1.001723 |
| H | -7.636127  | -1.282546 | 1.699316  |
| H | -5.189904  | -1.125084 | 1.596684  |
| H | 5.187586   | 1.127382  | -1.595009 |
| H | 7.633619   | 1.285189  | -1.700993 |
| H | 7.975267   | -2.020745 | 0.995581  |
| H | 5.528258   | -2.187294 | 1.100211  |
| H | 9.948075   | -1.199865 | -0.246242 |
| H | 9.805370   | 0.147299  | -1.366186 |
| H | 9.537467   | 1.718533  | 0.563792  |
| H | 9.682139   | 0.376558  | 1.678862  |
| H | 11.873443  | 1.561798  | 1.449862  |
| H | 12.014547  | -0.086342 | 0.829730  |
| H | 11.868490  | 1.269612  | -0.292297 |
| H | -9.948114  | 1.200285  | 0.232886  |
| H | -9.807875  | -0.139869 | 1.361510  |
| H | -9.677831  | -0.388497 | -1.681725 |
| H | -9.536720  | -1.723347 | -0.557687 |
| H | -11.870388 | -1.571264 | -1.450259 |
| H | -11.869624 | -1.267222 | 0.289888  |
| H | -12.012046 | 0.081136  | -0.841721 |
| H | 2.576751   | 2.242083  | 0.002149  |
| H | -2.576947  | -2.241563 | 0.001823  |

5d

|   |            |           |           |
|---|------------|-----------|-----------|
| C | 5.807067   | -0.428104 | 1.054739  |
| C | 5.206783   | 0.501025  | 0.198862  |
| C | 6.037572   | 1.271196  | -0.621234 |
| C | 7.415502   | 1.122819  | -0.583168 |
| C | 8.016697   | 0.205210  | 0.277564  |
| C | 7.185948   | -0.563312 | 1.094006  |
| C | 3.746699   | 0.717715  | 0.170018  |
| C | 2.827530   | -0.361636 | 0.191675  |
| C | 1.440100   | -0.108831 | 0.126901  |
| C | 0.969628   | 1.216953  | 0.048158  |
| C | 1.867156   | 2.268959  | 0.033789  |
| C | 3.232213   | 2.008090  | 0.094945  |
| C | 0.506358   | -1.231261 | 0.128795  |
| C | -0.938777  | -0.942383 | 0.049515  |
| C | -1.409902  | 0.384132  | -0.011176 |
| C | -0.476062  | 1.506427  | -0.015631 |
| C | -1.835368  | -1.995260 | 0.038741  |
| C | -3.199998  | -1.734668 | -0.033995 |
| C | -3.714583  | -0.443851 | -0.098526 |
| C | -2.797010  | 0.636902  | -0.082311 |
| C | -5.171456  | -0.230038 | -0.204930 |
| C | -5.934352  | -1.054150 | -1.038382 |
| C | -7.309381  | -0.901294 | -1.129892 |
| C | -7.975701  | 0.074951  | -0.389912 |
| C | -7.212143  | 0.898003  | 0.438735  |
| C | -5.836049  | 0.758222  | 0.528149  |
| C | -9.470935  | 0.211592  | -0.453349 |
| C | -10.189558 | -0.638231 | 0.599169  |
| C | -11.703390 | -0.499112 | 0.532593  |
| O | -0.873840  | 2.675904  | -0.075438 |
| O | 0.904062   | -2.400645 | 0.191003  |
| C | 9.507238   | 0.013509  | 0.288466  |
| C | 9.972751   | -1.075961 | -0.682564 |



|   |            |           |           |
|---|------------|-----------|-----------|
| C | 11.482746  | -1.263898 | -0.674396 |
| H | 1.487048   | 3.281960  | -0.016377 |
| H | 3.930103   | 2.838899  | 0.103957  |
| O | 3.294993   | -1.600455 | 0.257096  |
| H | -1.455648  | -3.008025 | 0.096127  |
| O | -3.264327  | 1.875574  | -0.150763 |
| H | -3.899112  | -2.564446 | -0.021508 |
| H | -5.438756  | -1.805004 | -1.645951 |
| H | -7.875026  | -1.544046 | -1.798832 |
| H | -7.705719  | 1.670742  | 1.021704  |
| H | -5.269327  | 1.419578  | 1.171095  |
| H | 5.188383   | -1.040265 | 1.698492  |
| H | 7.629603   | -1.280846 | 1.778804  |
| H | 8.037102   | 1.729385  | -1.236019 |
| H | 5.595201   | 1.980776  | -1.313535 |
| H | 10.000800  | 0.958037  | 0.030762  |
| H | 9.837210   | -0.244849 | 1.301661  |
| H | 9.475598   | -2.018271 | -0.424776 |
| H | 9.631630   | -0.820928 | -1.692666 |
| H | 11.790894  | -2.045718 | -1.373875 |
| H | 11.998297  | -0.341034 | -0.959543 |
| H | 11.841695  | -1.547873 | 0.320249  |
| H | -9.824607  | -0.077603 | -1.450013 |
| H | -9.750267  | 1.262892  | -0.316479 |
| H | -9.902672  | -1.687767 | 0.464830  |
| H | -9.829775  | -0.351371 | 1.594183  |
| H | -12.194224 | -1.113300 | 1.292430  |
| H | -12.013211 | 0.538653  | 0.693170  |
| H | -12.087168 | -0.809826 | -0.444591 |
| H | 2.501173   | -2.197419 | 0.243479  |
| H | -2.470266  | 2.472350  | -0.144063 |

5e

|   |           |           |           |
|---|-----------|-----------|-----------|
| C | 5.849529  | 0.360280  | -0.944284 |
| C | 5.173735  | -0.571426 | -0.149770 |
| C | 5.934222  | -1.399276 | 0.682103  |
| C | 7.316985  | -1.303190 | 0.714900  |
| C | 7.993501  | -0.382593 | -0.084399 |
| C | 7.232730  | 0.442993  | -0.913276 |
| C | 3.706663  | -0.729626 | -0.195797 |
| C | 2.833117  | 0.386928  | -0.218259 |
| C | 1.435389  | 0.189636  | -0.224149 |
| C | 0.909351  | -1.117518 | -0.215510 |
| C | 1.762793  | -2.205635 | -0.201259 |
| C | 3.138547  | -1.999489 | -0.192002 |
| C | 0.548143  | 1.349093  | -0.224291 |
| C | -0.909343 | 1.117476  | -0.215507 |
| C | -1.435391 | -0.189679 | -0.224138 |
| C | -0.548134 | -1.349142 | -0.224310 |
| C | -1.762773 | 2.205602  | -0.201269 |
| C | -3.138529 | 1.999473  | -0.192017 |
| C | -3.706655 | 0.729618  | -0.195784 |
| C | -2.833128 | -0.386949 | -0.218225 |
| C | -5.173727 | 0.571431  | -0.149749 |
| C | -5.934207 | 1.399334  | 0.682075  |
| C | -7.316973 | 1.303263  | 0.714872  |
| C | -7.993492 | 0.382625  | -0.084372 |
| C | -7.232725 | -0.443024 | -0.913194 |
| C | -5.849525 | -0.360322 | -0.944206 |
| C | -9.488873 | 0.248482  | -0.018051 |
| C | -9.947025 | -0.794429 | 1.006159  |

|   |            |           |           |
|---|------------|-----------|-----------|
| C | -11.461546 | -0.925962 | 1.072765  |
| O | -0.994300  | -2.502543 | -0.226589 |
| O | 0.994337   | 2.502484  | -0.226635 |
| C | 9.488879   | -0.248423 | -0.018055 |
| C | 9.946995   | 0.794463  | 1.006193  |
| C | 11.461513  | 0.926010  | 1.072835  |
| H | 1.340883   | -3.203198 | -0.205551 |
| H | 3.802762   | -2.857483 | -0.200650 |
| O | 3.352249   | 1.606796  | -0.216676 |
| H | -1.340851  | 3.203160  | -0.205563 |
| O | -3.352306  | -1.606794 | -0.216626 |
| H | -3.802736  | 2.857473  | -0.200683 |
| H | -5.432922  | 2.113289  | 1.328248  |
| H | -7.882466  | 1.954514  | 1.375667  |
| H | -7.735274  | -1.164590 | -1.551570 |
| H | -5.286304  | -1.016807 | -1.595222 |
| H | 5.286308   | 1.016724  | -1.595339 |
| H | 7.735275   | 1.164512  | -1.551709 |
| H | 7.882482   | -1.954396 | 1.375736  |
| H | 5.432943   | -2.113203 | 1.328310  |
| H | 9.933665   | -1.218224 | 0.234379  |
| H | 9.877427   | 0.025404  | -1.006101 |
| H | 9.496783   | 1.761755  | 0.754751  |
| H | 9.549871   | 0.523428  | 1.991350  |
| H | 11.764614  | 1.674852  | 1.809605  |
| H | 11.929672  | -0.023492 | 1.352250  |
| H | 11.876347  | 1.225500  | 0.104832  |
| H | -9.933642  | 1.218282  | 0.234410  |
| H | -9.877414  | -0.025307 | -1.006110 |
| H | -9.496818  | -1.761718 | 0.754700  |
| H | -9.549920  | -0.523421 | 1.991331  |
| H | -11.764668 | -1.674815 | 1.809514  |
| H | -11.929702 | 0.023539  | 1.352187  |
| H | -11.876362 | -1.225431 | 0.104748  |
| H | 2.583410   | 2.235618  | -0.215804 |
| H | -2.583490  | -2.235642 | -0.215686 |

5f

|   |           |           |           |
|---|-----------|-----------|-----------|
| C | -5.798329 | 0.847418  | 0.619335  |
| C | -5.205226 | -0.155792 | -0.154242 |
| C | -6.036931 | -0.941626 | -0.958739 |
| C | -7.408359 | -0.739664 | -0.981686 |
| C | -8.002810 | 0.251168  | -0.201174 |
| C | -7.171040 | 1.037801  | 0.596695  |
| C | -3.754451 | -0.427052 | -0.118967 |
| C | -2.792834 | 0.615142  | -0.108843 |
| C | -1.415393 | 0.305083  | -0.106269 |
| C | -0.997002 | -1.040208 | -0.111635 |
| C | -1.935870 | -2.055623 | -0.116224 |
| C | -3.290233 | -1.738706 | -0.117526 |
| C | -0.436919 | 1.388781  | -0.109147 |
| C | 0.997005  | 1.040214  | -0.111631 |
| C | 1.415386  | -0.305075 | -0.106272 |
| C | 0.436924  | -1.388771 | -0.109185 |
| C | 1.935885  | 2.055617  | -0.116236 |
| C | 3.290245  | 1.738682  | -0.117548 |
| C | 3.754449  | 0.427020  | -0.118972 |
| C | 2.792813  | -0.615159 | -0.108834 |
| C | 5.205226  | 0.155753  | -0.154242 |
| C | 6.036925  | 0.941553  | -0.958781 |
| C | 7.408354  | 0.739603  | -0.981722 |

|   |            |           |           |
|---|------------|-----------|-----------|
| C | 8.002816   | -0.251178 | -0.201156 |
| C | 7.171057   | -1.037776 | 0.596759  |
| C | 5.798344   | -0.847406 | 0.619392  |
| C | 9.493615   | -0.440397 | -0.189534 |
| C | 10.183884  | 0.362547  | 0.917417  |
| C | 11.694109  | 0.176781  | 0.924453  |
| O | 0.788142   | -2.574597 | -0.112241 |
| O | -0.788104  | 2.574619  | -0.112237 |
| C | -9.493607  | 0.440397  | -0.189554 |
| C | -10.183881 | -0.362465 | 0.917453  |
| C | -11.694104 | -0.176690 | 0.924474  |
| H | -1.596035  | -3.084048 | -0.109470 |
| H | -4.020899  | -2.540596 | -0.098199 |
| O | -3.210146  | 1.873404  | -0.116736 |
| H | 1.596061   | 3.084046  | -0.109488 |
| O | 3.210070   | -1.873444 | -0.116701 |
| H | 4.020922   | 2.540562  | -0.098236 |
| H | 5.598660   | 1.701962  | -1.597614 |
| H | 8.028629   | 1.354352  | -1.628105 |
| H | 7.607836   | -1.821346 | 1.209886  |
| H | 5.178740   | -1.479961 | 1.241889  |
| H | -5.178715  | 1.480002  | 1.241793  |
| H | -7.607807  | 1.821411  | 1.209780  |
| H | -8.028641  | -1.354439 | -1.628037 |
| H | -5.598676  | -1.702071 | -1.597536 |
| H | -9.909017  | 0.144134  | -1.159910 |
| H | -9.728725  | 1.503529  | -0.060899 |
| H | -9.936859  | -1.423356 | 0.793676  |
| H | -9.764797  | -0.065512 | 1.885943  |
| H | -12.163436 | -0.756658 | 1.723774  |
| H | -11.963715 | 0.873896  | 1.073903  |
| H | -12.137186 | -0.498690 | -0.023544 |
| H | 9.909020   | -0.144198 | -1.159911 |
| H | 9.728743   | -1.503517 | -0.060806 |
| H | 9.936856   | 1.423429  | 0.793568  |
| H | 9.764802   | 0.065658  | 1.885928  |
| H | 12.163437  | 0.756807  | 1.723712  |
| H | 11.963724  | -0.873793 | 1.073955  |
| H | 12.137189  | 0.498718  | -0.023588 |
| H | -2.392011  | 2.436967  | -0.123214 |
| H | 2.391922   | -2.436981 | -0.123089 |

6a

|   |           |           |          |
|---|-----------|-----------|----------|
| C | -4.403832 | -0.697847 | 0.000000 |
| C | -4.403832 | 0.697847  | 0.000000 |
| C | -3.206563 | -1.392063 | 0.000000 |
| C | -1.995574 | -0.698125 | 0.000000 |
| C | -1.995574 | 0.698125  | 0.000000 |
| C | -3.206563 | 1.392064  | 0.000000 |
| H | -5.343869 | -1.239841 | 0.000000 |
| H | -3.174171 | -2.475369 | 0.000000 |
| H | -5.343869 | 1.239842  | 0.000000 |
| H | -3.174170 | 2.475370  | 0.000000 |
| C | -0.728814 | -1.459382 | 0.000000 |
| C | 0.526124  | -0.716770 | 0.000000 |
| C | 0.526124  | 0.716770  | 0.000000 |
| C | -0.728814 | 1.459382  | 0.000000 |
| O | -0.780210 | -2.696243 | 0.000000 |
| O | -0.780211 | 2.696243  | 0.000000 |
| C | 1.749900  | -1.432150 | 0.000000 |
| C | 2.954288  | -0.681556 | 0.000000 |

|   |          |           |           |
|---|----------|-----------|-----------|
| C | 2.954289 | 0.681555  | 0.000000  |
| C | 1.749901 | 1.432150  | 0.000000  |
| H | 3.902606 | 1.205497  | 0.000000  |
| H | 3.902605 | -1.205498 | 0.000000  |
| N | 1.797110 | -2.783097 | 0.000000  |
| N | 1.797112 | 2.783096  | 0.000000  |
| C | 3.006313 | 3.557304  | 0.000000  |
| H | 0.884961 | 3.232255  | 0.000000  |
| H | 2.736269 | 4.613494  | 0.000000  |
| H | 3.622538 | 3.369691  | 0.888932  |
| H | 3.622538 | 3.369691  | -0.888932 |
| C | 3.006309 | -3.557306 | 0.000000  |
| H | 0.884958 | -3.232254 | 0.000000  |
| H | 2.736264 | -4.613495 | 0.000000  |
| H | 3.622535 | -3.369694 | -0.888932 |
| H | 3.622535 | -3.369694 | 0.888932  |

7a

|   |           |           |           |
|---|-----------|-----------|-----------|
| C | -1.392119 | 4.408357  | -0.000107 |
| C | -0.698058 | 3.197258  | -0.000043 |
| C | 0.698030  | 3.197273  | -0.000038 |
| C | 1.392049  | 4.408400  | -0.000077 |
| C | 0.697921  | 5.605680  | -0.000129 |
| C | -0.698028 | 5.605661  | -0.000157 |
| C | -1.459985 | 1.930256  | 0.000136  |
| C | -0.716976 | 0.675549  | 0.000268  |
| C | 0.716978  | 0.675565  | 0.000068  |
| C | 1.459987  | 1.930259  | -0.000079 |
| C | 1.433083  | -0.547777 | -0.000083 |
| C | 0.681401  | -1.752300 | -0.000340 |
| C | -0.681375 | -1.752311 | -0.000127 |
| C | -1.433066 | -0.547796 | 0.000371  |
| O | -2.696601 | 1.981989  | 0.000151  |
| O | 2.696606  | 1.981993  | -0.000279 |
| N | -2.783758 | -0.597948 | 0.001125  |
| C | -3.565860 | -1.807590 | -0.000571 |
| C | -5.049730 | -1.478228 | 0.000771  |
| C | -5.926078 | -2.722982 | -0.000335 |
| C | -7.417978 | -2.411660 | 0.000480  |
| C | -8.285660 | -3.662278 | -0.000564 |
| N | 2.783777  | -0.597920 | -0.000001 |
| C | 3.565880  | -1.807569 | -0.000606 |
| C | 5.049745  | -1.478214 | 0.000180  |
| C | 5.926098  | -2.722962 | -0.000204 |
| C | 7.417994  | -2.411623 | 0.000539  |
| C | 8.285695  | -3.662227 | 0.000155  |
| H | -1.205012 | -2.700688 | -0.000352 |
| H | 1.205060  | -2.700663 | -0.000713 |
| H | 2.475403  | 4.375543  | -0.000078 |
| H | 1.239825  | 6.545823  | -0.000147 |
| H | -1.239961 | 6.545788  | -0.000215 |
| H | -2.475471 | 4.375468  | -0.000091 |
| H | 3.238093  | 0.313014  | -0.000326 |
| H | -3.238059 | 0.313007  | 0.000233  |
| H | 3.331256  | -2.420872 | -0.883929 |
| H | 3.330608  | -2.422033 | 0.881718  |
| H | 5.278219  | -0.862879 | -0.878811 |
| H | 5.277488  | -0.863902 | 0.880070  |
| H | 5.686982  | -3.337956 | -0.878284 |
| H | 5.686314  | -3.338954 | 0.876992  |
| H | 7.657178  | -1.797148 | 0.877317  |

|   |           |           |           |
|---|-----------|-----------|-----------|
| H | 7.657845  | -1.796153 | -0.875357 |
| H | -3.330471 | -2.422852 | 0.881156  |
| H | -3.331357 | -2.420099 | -0.884486 |
| H | -5.277246 | -0.864577 | 0.881180  |
| H | -5.278421 | -0.862238 | -0.877700 |
| H | -5.686354 | -3.339426 | 0.876559  |
| H | -5.686892 | -3.337519 | -0.878719 |
| H | -7.657787 | -1.795762 | -0.875128 |
| H | -7.657220 | -1.797621 | 0.877546  |
| H | 8.089127  | -4.279500 | 0.882753  |
| H | 9.350106  | -3.412246 | 0.000760  |
| H | 8.089876  | -4.278436 | -0.883351 |
| H | -8.089905 | -4.277971 | -0.884444 |
| H | -9.350075 | -3.412317 | 0.000279  |
| H | -8.089005 | -4.280062 | 0.881658  |

7b

|   |           |           |           |
|---|-----------|-----------|-----------|
| C | 4.881770  | -1.394770 | 0.517264  |
| C | 3.703737  | -0.699956 | 0.237267  |
| C | 3.704580  | 0.695859  | 0.237167  |
| C | 4.883452  | 1.389286  | 0.517082  |
| C | 6.047998  | 0.694587  | 0.793082  |
| C | 6.047156  | -0.701444 | 0.793165  |
| C | 2.471261  | -1.461100 | -0.056247 |
| C | 1.252636  | -0.718578 | -0.355431 |
| C | 1.253515  | 0.717351  | -0.355583 |
| C | 2.473047  | 1.458446  | -0.056548 |
| C | 0.067708  | 1.435400  | -0.651947 |
| C | -1.102972 | 0.681525  | -0.933487 |
| C | -1.103801 | -0.679999 | -0.933347 |
| C | 0.065954  | -1.435238 | -0.651647 |
| O | 2.522199  | -2.698350 | -0.038207 |
| O | 2.525499  | 2.695639  | -0.038802 |
| N | 0.029259  | -2.787501 | -0.679718 |
| C | -1.131248 | -3.593349 | -0.961078 |
| C | -2.065561 | -3.795086 | 0.232315  |
| C | -3.276700 | -4.649575 | -0.115339 |
| C | -4.210363 | -4.889188 | 1.065500  |
| C | -5.421210 | -5.738315 | 0.705425  |
| N | 0.032671  | 2.787703  | -0.680315 |
| C | -1.126987 | 3.594892  | -0.961334 |
| C | -2.060894 | 3.797431  | 0.232249  |
| C | -3.271258 | 4.653149  | -0.115094 |
| C | -4.204516 | 4.893488  | 1.065915  |
| C | -5.414671 | 5.743713  | 0.706098  |
| H | -2.029982 | -1.198648 | -1.148853 |
| H | -2.028521 | 1.201252  | -1.149101 |
| H | 4.851982  | 2.472618  | 0.509387  |
| H | 6.963234  | 1.235973  | 1.009344  |
| H | 6.961741  | -1.243909 | 1.009481  |
| H | 4.848989  | -2.478065 | 0.509717  |
| H | 0.920419  | 3.224838  | -0.441091 |
| H | 0.916500  | -3.225671 | -0.440511 |
| H | -0.762364 | 4.569174  | -1.301821 |
| H | -1.685613 | 3.174420  | -1.807644 |
| H | -2.389459 | 2.821001  | 0.608970  |
| H | -1.491820 | 4.261995  | 1.046064  |
| H | -3.835307 | 4.176990  | -0.929232 |
| H | -2.933219 | 5.621215  | -0.509840 |
| H | -3.642288 | 5.375516  | 1.875247  |
| H | -4.538524 | 3.927056  | 1.463852  |

|   |           |           |           |
|---|-----------|-----------|-----------|
| H | -0.767650 | -4.567976 | -1.301684 |
| H | -1.689278 | -3.172103 | -1.807392 |
| H | -1.497099 | -4.260318 | 1.046176  |
| H | -2.393210 | -2.818368 | 0.609090  |
| H | -2.939520 | -5.617910 | -0.510164 |
| H | -3.840167 | -4.172771 | -0.929501 |
| H | -4.543581 | -3.922495 | 1.463463  |
| H | -3.648686 | -5.371779 | 1.874880  |
| H | -5.110100 | 6.727739  | 0.335137  |
| H | -6.065245 | 5.902163  | 1.570515  |
| H | -6.013304 | 5.267462  | -0.077168 |
| H | -6.019309 | -5.261483 | -0.077897 |
| H | -6.072056 | -5.896255 | 1.569732  |
| H | -5.117442 | -6.722578 | 0.334437  |

7c

|   |           |           |           |
|---|-----------|-----------|-----------|
| C | -1.353978 | -0.103831 | 0.476589  |
| C | -0.674255 | 1.117101  | 0.238252  |
| C | 0.679614  | 1.113667  | -0.239752 |
| C | 1.353042  | -0.110657 | -0.478441 |
| C | 0.639351  | -1.312499 | -0.224833 |
| C | -0.646245 | -1.309256 | 0.223239  |
| C | 1.382644  | 2.367207  | -0.485587 |
| C | 0.667210  | 3.635563  | -0.232619 |
| C | -0.648534 | 3.638891  | 0.232965  |
| C | -1.370738 | 2.374145  | 0.484742  |
| C | 1.324561  | 4.845179  | -0.464382 |
| C | 0.673514  | 6.044063  | -0.232310 |
| C | -0.641960 | 6.047390  | 0.234795  |
| C | -1.299420 | 4.851797  | 0.465775  |
| O | -2.537921 | 2.431563  | 0.894607  |
| O | 2.549992  | 2.418776  | -0.895730 |
| N | 2.622327  | -0.155716 | -0.945675 |
| C | 3.397679  | -1.350583 | -1.162321 |
| C | 4.011244  | -1.942378 | 0.106695  |
| C | 4.829367  | -3.196598 | -0.168538 |
| C | 5.453813  | -3.799712 | 1.084047  |
| C | 6.269146  | -5.053369 | 0.800695  |
| N | -2.623688 | -0.142481 | 0.943174  |
| C | -3.404530 | -1.333496 | 1.161271  |
| C | -4.021662 | -1.923212 | -0.106968 |
| C | -4.845280 | -3.173574 | 0.169495  |
| C | -5.473600 | -3.774149 | -1.082371 |
| C | -6.293758 | -5.024449 | -0.798113 |
| H | -1.139264 | -2.258678 | 0.393096  |
| H | 1.127643  | -2.264394 | -0.394493 |
| H | 2.345646  | 4.809790  | -0.826057 |
| H | 1.186728  | 6.982865  | -0.413389 |
| H | -1.150123 | 6.988774  | 0.416707  |
| H | -2.320704 | 4.821514  | 0.827350  |
| H | 3.044519  | 0.762183  | -1.070563 |
| H | -3.041044 | 0.777552  | 1.068691  |
| H | 4.197813  | -1.088099 | -1.861536 |
| H | 2.791834  | -2.108794 | -1.675378 |
| H | 4.640066  | -1.178376 | 0.578954  |
| H | 3.214570  | -2.168085 | 0.826191  |
| H | 5.623446  | -2.964057 | -0.891494 |
| H | 4.193389  | -3.950880 | -0.652738 |
| H | 4.660426  | -4.031975 | 1.805610  |
| H | 6.089844  | -3.047185 | 1.566326  |
| H | -4.202937 | -1.066819 | 1.860875  |

|   |           |           |           |
|---|-----------|-----------|-----------|
| H | -2.801893 | -2.094255 | 1.674352  |
| H | -4.647333 | -1.156660 | -0.579278 |
| H | -3.226486 | -2.152937 | -0.826841 |
| H | -5.637600 | -2.937181 | 0.893117  |
| H | -4.212293 | -3.930614 | 0.653315  |
| H | -4.681952 | -4.009615 | -1.804804 |
| H | -6.107083 | -3.019019 | -1.563935 |
| H | 5.649993  | -5.833110 | 0.345105  |
| H | 6.701650  | -5.466266 | 1.716161  |
| H | 7.092697  | -4.842234 | 0.110879  |
| H | -5.677227 | -5.806853 | -0.343536 |
| H | -6.729263 | -5.435353 | -1.713053 |
| H | -7.115460 | -4.810013 | -0.107111 |

8a

|   |           |           |           |
|---|-----------|-----------|-----------|
| C | 5.465908  | -3.322329 | -0.159696 |
| C | 4.255454  | -3.311219 | -0.851210 |
| C | 3.354069  | -2.263573 | -0.726663 |
| C | 3.633174  | -1.191335 | 0.124505  |
| C | 4.849502  | -1.187417 | 0.812845  |
| C | 5.747821  | -2.231345 | 0.663552  |
| N | 2.789777  | -0.083741 | 0.261738  |
| C | 1.428098  | -0.053295 | 0.270188  |
| C | 0.717721  | 1.164980  | 0.163944  |
| C | -0.717796 | 1.165145  | 0.163882  |
| C | -1.428462 | -0.052961 | 0.270083  |
| C | -0.680646 | -1.241991 | 0.468093  |
| C | 0.679987  | -1.242149 | 0.468147  |
| C | 1.458797  | 2.419337  | 0.058764  |
| C | 0.698278  | 3.673126  | -0.117769 |
| C | -0.697782 | 3.673285  | -0.117830 |
| C | -1.458595 | 2.419663  | 0.058627  |
| C | 1.392866  | 4.873718  | -0.274040 |
| C | 0.698459  | 6.059970  | -0.435256 |
| C | -0.697396 | 6.060129  | -0.435318 |
| C | -1.392085 | 4.874032  | -0.274163 |
| N | -2.790140 | -0.083142 | 0.261533  |
| C | -3.633590 | -1.190753 | 0.124417  |
| C | -3.354710 | -2.262641 | -0.727328 |
| C | -4.255929 | -3.310378 | -0.851826 |
| C | -5.466065 | -3.321938 | -0.159655 |
| C | -5.747747 | -2.231348 | 0.664120  |
| C | -4.849505 | -1.187272 | 0.813360  |
| O | -2.693672 | 2.478254  | 0.107225  |
| O | 2.693886  | 2.477670  | 0.107502  |
| C | -6.424069 | -4.471041 | -0.282799 |
| C | 6.424241  | -4.471135 | -0.282882 |
| H | 1.240419  | 6.991558  | -0.560571 |
| H | 2.476142  | 4.842779  | -0.264438 |
| H | -1.239136 | 6.991838  | -0.560680 |
| H | -2.475370 | 4.843337  | -0.264657 |
| H | -1.211929 | -2.164492 | 0.668395  |
| H | 1.211026  | -2.164768 | 0.668537  |
| H | -3.207033 | 0.850664  | 0.280170  |
| H | 3.206801  | 0.850011  | 0.280430  |
| H | 5.080198  | -0.354785 | 1.469812  |
| H | 2.445313  | -2.260801 | -1.318143 |
| H | 6.688041  | -2.200824 | 1.206825  |
| H | 4.018655  | -4.131368 | -1.523172 |
| H | -2.446252 | -2.259365 | -1.319276 |
| H | -4.019362 | -4.130216 | -1.524254 |

|   |           |           |           |
|---|-----------|-----------|-----------|
| H | -5.080022 | -0.354944 | 1.470770  |
| H | -6.687654 | -2.201255 | 1.207948  |
| H | 7.462004  | -4.132140 | -0.229410 |
| H | 6.276170  | -5.197287 | 0.524489  |
| H | 6.290102  | -5.001615 | -1.228665 |
| H | -7.461762 | -4.133392 | -0.220721 |
| H | -6.295572 | -4.996315 | -1.232285 |
| H | -6.269931 | -5.201412 | 0.519624  |

8b

|   |           |           |           |
|---|-----------|-----------|-----------|
| C | 5.535602  | -3.274188 | -0.243552 |
| C | 4.433082  | -3.155405 | -1.089369 |
| C | 3.508304  | -2.131991 | -0.941217 |
| C | 3.650364  | -1.197098 | 0.087775  |
| C | 4.758073  | -1.300341 | 0.932330  |
| C | 5.684158  | -2.316989 | 0.760213  |
| N | 2.778790  | -0.115685 | 0.263321  |
| C | 1.424550  | -0.088430 | 0.118369  |
| C | 0.714225  | 1.133846  | 0.070593  |
| C | -0.714232 | 1.133847  | -0.070583 |
| C | -1.424556 | -0.088430 | -0.118373 |
| C | -0.678229 | -1.292873 | -0.055433 |
| C | 0.678226  | -1.292873 | 0.055394  |
| C | 1.445371  | 2.392568  | 0.196044  |
| C | 0.692009  | 3.658632  | 0.090983  |
| C | -0.692013 | 3.658633  | -0.090978 |
| C | -1.445379 | 2.392569  | -0.196023 |
| C | 1.380562  | 4.869354  | 0.182310  |
| C | 0.691988  | 6.066404  | 0.090973  |
| C | -0.691986 | 6.066405  | -0.090999 |
| C | -1.380563 | 4.869355  | -0.182320 |
| N | -2.778798 | -0.115683 | -0.263305 |
| C | -3.650370 | -1.197099 | -0.087774 |
| C | -3.508280 | -2.132032 | 0.941187  |
| C | -4.433053 | -3.155441 | 1.089337  |
| C | -5.535606 | -3.274192 | 0.243546  |
| C | -5.684196 | -2.316957 | -0.760170 |
| C | -4.758108 | -1.300304 | -0.932287 |
| O | -2.665327 | 2.445201  | -0.395951 |
| O | 2.665316  | 2.445198  | 0.395989  |
| C | -6.516562 | -4.399863 | 0.398585  |
| C | 6.516614  | -4.399811 | -0.398613 |
| H | 1.229261  | 7.006475  | 0.160933  |
| H | 2.454397  | 4.837504  | 0.325044  |
| H | -1.229257 | 7.006476  | -0.160972 |
| H | -2.454398 | 4.837506  | -0.325052 |
| H | -1.204088 | -2.237678 | -0.115078 |
| H | 1.204088  | -2.237679 | 0.115011  |
| H | -3.176911 | 0.809761  | -0.439310 |
| H | 3.176901  | 0.809757  | 0.439346  |
| H | 4.882930  | -0.573431 | 1.728601  |
| H | 2.691485  | -2.036167 | -1.648048 |
| H | 6.539268  | -2.371430 | 1.427910  |
| H | 4.304358  | -3.866785 | -1.900399 |
| H | -2.691441 | -2.036229 | 1.647997  |
| H | -4.304310 | -3.866844 | 1.900344  |
| H | -4.882998 | -0.573360 | -1.728522 |
| H | -6.539337 | -2.371364 | -1.427831 |
| H | 7.509549  | -4.114748 | -0.042623 |
| H | 6.202532  | -5.278837 | 0.175604  |
| H | 6.607432  | -4.708261 | -1.443177 |



|   |           |           |           |
|---|-----------|-----------|-----------|
| H | -7.509227 | -4.115248 | 0.041498  |
| H | -6.201802 | -5.279267 | -0.174683 |
| H | -6.608252 | -4.707551 | 1.443301  |

9a

|   |           |           |           |
|---|-----------|-----------|-----------|
| C | -3.469529 | -0.889701 | 1.079103  |
| C | -3.653621 | 0.052797  | 0.063373  |
| C | -4.797512 | -0.040008 | -0.733176 |
| C | -5.719151 | -1.054465 | -0.527842 |
| C | -5.531399 | -2.017649 | 0.463775  |
| C | -4.391449 | -1.910403 | 1.260451  |
| N | -2.787882 | 1.133163  | -0.143555 |
| C | -1.428707 | 1.159493  | -0.056843 |
| C | -0.716648 | 2.381723  | -0.039969 |
| C | 0.716443  | 2.381415  | 0.040328  |
| C | 1.427987  | 1.158943  | 0.057927  |
| C | 0.679370  | -0.045280 | 0.027536  |
| C | -0.680597 | -0.045023 | -0.025367 |
| C | -1.451995 | 3.640684  | -0.135464 |
| C | -0.694633 | 4.906581  | -0.062728 |
| C | 0.695696  | 4.906280  | 0.061787  |
| C | 1.452440  | 3.640049  | 0.135041  |
| C | 1.387739  | 6.116846  | 0.124334  |
| C | 0.696252  | 7.314037  | 0.061390  |
| C | -0.694041 | 7.314340  | -0.063359 |
| C | -1.386098 | 6.117451  | -0.125790 |
| N | 2.787190  | 1.132257  | 0.144716  |
| C | 3.652912  | 0.052023  | -0.062649 |
| C | 4.797740  | -0.039928 | 0.732690  |
| C | 5.719461  | -1.054230 | 0.527039  |
| C | 5.530973  | -2.018115 | -0.463760 |
| C | 4.390169  | -1.911670 | -1.259310 |
| C | 3.468092  | -0.891169 | -1.077627 |
| C | 6.503665  | -3.149638 | -0.647413 |
| C | 6.125321  | -4.397488 | 0.154414  |
| C | 7.108183  | -5.547498 | -0.025889 |
| C | 6.725763  | -6.787466 | 0.769902  |
| O | -2.679283 | 3.693764  | -0.283776 |
| O | 2.679701  | 3.692486  | 0.283722  |
| C | -6.503987 | -3.149316 | 0.647108  |
| C | -6.125270 | -4.397083 | -0.154669 |
| C | -7.108030 | -5.547222 | 0.025381  |
| C | -6.725422 | -6.787040 | -0.770550 |
| H | -1.233525 | 8.254525  | -0.111325 |
| H | 1.236182  | 8.253986  | 0.108947  |
| H | 2.466573  | 6.084802  | 0.222341  |
| H | -2.464948 | 6.085879  | -0.223784 |
| H | 1.206990  | -0.990175 | 0.065518  |
| H | -1.208631 | -0.989736 | -0.062270 |
| H | -3.192041 | 2.058975  | -0.303455 |
| H | 3.191506  | 2.058008  | 0.304504  |
| H | -4.953418 | 0.693544  | -1.517834 |
| H | -6.603890 | -1.101515 | -1.156799 |
| H | -4.232185 | -2.627706 | 2.061165  |
| H | -2.622290 | -0.800727 | 1.750091  |
| H | 2.620221  | -0.802888 | -1.747894 |
| H | 4.230298  | -2.629478 | -2.059451 |
| H | 6.604872  | -1.100599 | 1.155102  |
| H | 4.954280  | 0.694167  | 1.516718  |
| H | 7.506665  | -2.821635 | -0.350259 |
| H | 6.565265  | -3.411686 | -1.710459 |

|   |           |           |           |
|---|-----------|-----------|-----------|
| H | -7.506950 | -2.821435 | 0.349688  |
| H | -6.565846 | -3.411408 | 1.710124  |
| H | -5.119367 | -4.721950 | 0.141102  |
| H | -6.056354 | -4.133152 | -1.217734 |
| H | -7.176134 | -5.800089 | 1.091157  |
| H | -8.110982 | -5.214427 | -0.270740 |
| H | -6.680735 | -6.569728 | -1.842588 |
| H | -7.446794 | -7.596047 | -0.625715 |
| H | -5.741667 | -7.161475 | -0.469485 |
| H | 6.056610  | -4.133590 | 1.217501  |
| H | 5.119393  | -4.722480 | -0.141135 |
| H | 7.176218  | -5.800213 | -1.091706 |
| H | 8.111129  | -5.214651 | 0.270191  |
| H | 6.681126  | -6.570305 | 1.841973  |
| H | 7.447209  | -7.596379 | 0.624908  |
| H | 5.742025  | -7.161956 | 0.468849  |

9b

|   |           |           |           |
|---|-----------|-----------|-----------|
| C | -3.366929 | -0.950671 | 1.013840  |
| C | -3.634786 | 0.057259  | 0.082636  |
| C | -4.839424 | 0.009633  | -0.623246 |
| C | -5.737995 | -1.024982 | -0.415308 |
| C | -5.467632 | -2.052452 | 0.488556  |
| C | -4.267927 | -1.988931 | 1.197858  |
| N | -2.789845 | 1.153523  | -0.120864 |
| C | -1.428375 | 1.182530  | -0.132974 |
| C | -0.717844 | 2.405481  | -0.129522 |
| C | 0.717721  | 2.405532  | -0.129477 |
| C | 1.428339  | 1.182636  | -0.132900 |
| C | 0.680329  | -0.018550 | -0.232144 |
| C | -0.680274 | -0.018600 | -0.232167 |
| C | -1.458877 | 3.664101  | -0.135696 |
| C | -0.698172 | 4.928819  | -0.078537 |
| C | 0.697899  | 4.928862  | -0.078419 |
| C | 1.458685  | 3.664190  | -0.135501 |
| C | -1.392679 | 6.138899  | -0.037206 |
| C | -0.698150 | 7.335058  | 0.009593  |
| C | 0.697713  | 7.335100  | 0.009720  |
| C | 1.392324  | 6.138983  | -0.036963 |
| N | 2.789806  | 1.153702  | -0.120720 |
| C | 3.634735  | 0.057419  | 0.082881  |
| C | 4.839266  | 0.009569  | -0.623157 |
| C | 5.737813  | -1.025053 | -0.415110 |
| C | 5.467497  | -2.052302 | 0.489014  |
| C | 4.267876  | -1.988570 | 1.198448  |
| C | 3.366921  | -0.950296 | 1.014326  |
| C | 6.415296  | -3.205295 | 0.669530  |
| C | 6.060243  | -4.410765 | -0.204605 |
| C | 7.017201  | -5.583060 | -0.028824 |
| C | 6.652861  | -6.783067 | -0.891625 |
| O | 2.694039  | 3.718100  | -0.185216 |
| O | -2.694227 | 3.717946  | -0.185586 |
| C | -6.415495 | -3.205410 | 0.668977  |
| C | -6.059741 | -4.411335 | -0.204242 |
| C | -7.016809 | -5.583555 | -0.028570 |
| C | -6.651839 | -6.783984 | -0.890518 |
| H | 1.239520  | 8.274504  | 0.045196  |
| H | -1.240021 | 8.274429  | 0.044967  |
| H | -2.475960 | 6.107296  | -0.043612 |
| H | 2.475607  | 6.107447  | -0.043185 |
| H | -1.211489 | -0.954422 | -0.355911 |

|   |           |           |           |
|---|-----------|-----------|-----------|
| H | 1.211627  | -0.954328 | -0.355874 |
| H | 3.206455  | 2.082856  | -0.217687 |
| H | -3.206517 | 2.082649  | -0.218029 |
| H | 2.467911  | -0.900680 | 1.618640  |
| H | 4.042622  | -2.757297 | 1.932877  |
| H | 6.669586  | -1.037269 | -0.973783 |
| H | 5.060239  | 0.792948  | -1.341211 |
| H | -2.467871 | -0.901247 | 1.618093  |
| H | -4.042615 | -2.757803 | 1.932119  |
| H | -6.669835 | -1.037041 | -0.973871 |
| H | -5.060462 | 0.793190  | -1.341085 |
| H | -7.435922 | -2.880165 | 0.435397  |
| H | -6.421627 | -3.514484 | 1.721272  |
| H | 6.420642  | -3.514928 | 1.721661  |
| H | 7.435888  | -2.879885 | 0.436888  |
| H | 6.046990  | -4.099079 | -1.256807 |
| H | 5.036827  | -4.732854 | 0.027189  |
| H | 8.037235  | -5.255001 | -0.265846 |
| H | 7.033320  | -5.880382 | 1.027509  |
| H | 5.651439  | -7.153559 | -0.649797 |
| H | 7.355476  | -7.608769 | -0.748848 |
| H | 6.659004  | -6.521673 | -1.954702 |
| H | -6.045689 | -4.100206 | -1.256597 |
| H | -5.036497 | -4.733288 | 0.028504  |
| H | -7.033690 | -5.880356 | 1.027898  |
| H | -8.036675 | -5.255622 | -0.266491 |
| H | -6.657283 | -6.523128 | -1.953730 |
| H | -7.354513 | -7.609645 | -0.747792 |
| H | -5.650562 | -7.154309 | -0.647831 |

9c

|   |           |           |           |
|---|-----------|-----------|-----------|
| C | -3.838099 | -0.709022 | 1.016060  |
| C | -3.864292 | 0.139225  | -0.094480 |
| C | -4.944982 | 0.051020  | -0.975455 |
| C | -5.959223 | -0.867851 | -0.756400 |
| C | -5.929483 | -1.738633 | 0.333252  |
| C | -4.850668 | -1.636748 | 1.211452  |
| N | -2.897599 | 1.126117  | -0.321728 |
| C | -1.555348 | 1.057361  | -0.096620 |
| C | -0.748604 | 2.218712  | -0.085960 |
| C | 0.663876  | 2.113929  | 0.146642  |
| C | 1.264088  | 0.845316  | 0.323114  |
| C | 0.424819  | -0.297481 | 0.286992  |
| C | -0.917870 | -0.195984 | 0.089081  |
| C | -1.362427 | 3.519979  | -0.341066 |
| C | -0.511638 | 4.725672  | -0.273577 |
| C | 0.854692  | 4.626941  | -0.005225 |
| C | 1.490134  | 3.315514  | 0.235194  |
| C | -1.088131 | 5.978288  | -0.490001 |
| C | -0.306429 | 7.119224  | -0.436870 |
| C | 1.059918  | 7.020406  | -0.169123 |
| C | 1.637557  | 5.781384  | 0.046474  |
| N | 2.598942  | 0.720275  | 0.563246  |
| C | 3.387411  | -0.435738 | 0.506965  |
| C | 4.417597  | -0.582495 | 1.439621  |
| C | 5.266836  | -1.675786 | 1.384616  |
| C | 5.115571  | -2.666380 | 0.413194  |
| C | 4.085176  | -2.510274 | -0.513098 |
| C | 3.237768  | -1.411590 | -0.481426 |
| C | 6.069338  | -3.826199 | 0.334380  |
| C | 7.336142  | -3.496958 | -0.459466 |

|   |           |           |           |
|---|-----------|-----------|-----------|
| C | 8.316380  | -4.660455 | -0.540199 |
| C | 9.576710  | -4.321601 | -1.323794 |
| O | 2.695622  | 3.284520  | 0.512531  |
| O | -2.559782 | 3.655523  | -0.621157 |
| C | -7.005334 | -2.768159 | 0.539313  |
| C | -6.696059 | -4.103004 | -0.143354 |
| C | -7.781936 | -5.150261 | 0.069227  |
| C | -7.469862 | -6.477200 | -0.608192 |
| H | 1.670551  | 7.916444  | -0.129836 |
| H | -0.756883 | 8.092070  | -0.604110 |
| H | -2.150805 | 6.023047  | -0.697996 |
| H | 2.694867  | 5.673260  | 0.258482  |
| H | -1.517434 | -1.097188 | 0.054761  |
| H | 0.865509  | -1.274956 | 0.439554  |
| H | 3.061932  | 1.621393  | 0.703200  |
| H | -3.208521 | 2.063993  | -0.584545 |
| H | 2.475664  | -1.295065 | -1.244203 |
| H | 3.950738  | -3.257042 | -1.290985 |
| H | 6.058784  | -1.768416 | 2.122896  |
| H | 4.537010  | 0.168574  | 2.213994  |
| H | -3.041742 | -0.617099 | 1.746459  |
| H | -4.813604 | -2.280361 | 2.086318  |
| H | -6.792739 | -0.911551 | -1.452083 |
| H | -4.978551 | 0.711931  | -1.835777 |
| H | -7.958837 | -2.382948 | 0.159150  |
| H | -7.146603 | -2.939470 | 1.613119  |
| H | 5.567582  | -4.684659 | -0.126984 |
| H | 6.351830  | -4.138895 | 1.346889  |
| H | 7.830253  | -2.630285 | -0.002061 |
| H | 7.052483  | -3.181645 | -1.471650 |
| H | 8.587913  | -4.974695 | 0.475730  |
| H | 7.816954  | -5.522826 | -0.999884 |
| H | 9.337043  | -4.035895 | -2.353047 |
| H | 10.264044 | -5.171063 | -1.366385 |
| H | 10.111920 | -3.483458 | -0.866070 |
| H | -6.552952 | -3.932545 | -1.218103 |
| H | -5.737539 | -4.484129 | 0.231826  |
| H | -7.922700 | -5.310571 | 1.145747  |
| H | -8.737132 | -4.761083 | -0.305635 |
| H | -7.357202 | -6.351582 | -1.689908 |
| H | -8.263316 | -7.210738 | -0.440237 |
| H | -6.536416 | -6.904550 | -0.227856 |

9d

|   |           |           |           |
|---|-----------|-----------|-----------|
| C | -3.512742 | -0.964923 | 0.975335  |
| C | -3.808088 | 0.133580  | 0.162923  |
| C | -5.086406 | 0.227455  | -0.393193 |
| C | -6.033575 | -0.754929 | -0.151603 |
| C | -5.742101 | -1.868544 | 0.636582  |
| C | -4.465438 | -1.949231 | 1.192986  |
| N | -2.908991 | 1.183079  | -0.055861 |
| C | -1.556729 | 1.116461  | -0.206752 |
| C | -0.749741 | 2.276050  | -0.148065 |
| C | 0.673396  | 2.172540  | -0.303669 |
| C | 1.275139  | 0.910678  | -0.516884 |
| C | 0.423930  | -0.215424 | -0.656975 |
| C | -0.925216 | -0.117270 | -0.508949 |
| C | -1.378764 | 3.576237  | 0.070610  |
| C | -0.510387 | 4.762971  | 0.210153  |
| C | 0.873963  | 4.662016  | 0.060357  |
| C | 1.513665  | 3.365964  | -0.243727 |

|    |           |           |           |
|----|-----------|-----------|-----------|
| C  | -1.090676 | 6.002497  | 0.484059  |
| C  | -0.294035 | 7.126719  | 0.614810  |
| C  | 1.090108  | 7.025710  | 0.465387  |
| C  | 1.670947  | 5.801045  | 0.185738  |
| N  | 2.623543  | 0.783608  | -0.662133 |
| C  | 3.396900  | -0.381411 | -0.626008 |
| C  | 3.127789  | -1.451646 | 0.231443  |
| C  | 3.962790  | -2.559600 | 0.249843  |
| C  | 5.097188  | -2.635280 | -0.557621 |
| C  | 5.368024  | -1.551158 | -1.393315 |
| C  | 4.533625  | -0.445983 | -1.436703 |
| C  | 6.027870  | -3.814116 | -0.485977 |
| C  | 7.139954  | -3.629234 | 0.549578  |
| C  | 8.089116  | -4.818110 | 0.633371  |
| C  | 9.191805  | -4.626328 | 1.665032  |
| O  | 2.736574  | 3.338415  | -0.430381 |
| O  | -2.604300 | 3.726041  | 0.150183  |
| C  | -6.757311 | -2.955100 | 0.857041  |
| C  | -6.667741 | -4.081385 | -0.176219 |
| C  | -7.701117 | -5.178414 | 0.045270  |
| C  | -7.608956 | -6.299874 | -0.980090 |
| H  | 1.711982  | 7.908977  | 0.567273  |
| H  | -0.746798 | 8.088411  | 0.832610  |
| H  | -2.168291 | 6.050696  | 0.588971  |
| H  | 2.741719  | 5.692623  | 0.058221  |
| H  | -1.542774 | -0.992625 | -0.669876 |
| H  | 0.860271  | -1.167432 | -0.934049 |
| H  | 3.103096  | 1.685941  | -0.706641 |
| H  | -3.256807 | 2.143649  | -0.011731 |
| H  | 4.748824  | 0.378965  | -2.108446 |
| H  | 6.244518  | -1.578133 | -2.034985 |
| H  | 3.733574  | -3.380534 | 0.923969  |
| H  | 2.279650  | -1.403811 | 0.905278  |
| H  | -2.547520 | -1.028730 | 1.465422  |
| H  | -4.217313 | -2.789851 | 1.835488  |
| H  | -7.023004 | -0.655468 | -0.589414 |
| H  | -5.327110 | 1.081032  | -1.018947 |
| H  | -7.765015 | -2.524087 | 0.830584  |
| H  | -6.627923 | -3.378780 | 1.860221  |
| H  | 6.478903  | -3.986273 | -1.470465 |
| H  | 5.457221  | -4.718449 | -0.243722 |
| H  | 6.687277  | -3.448440 | 1.532907  |
| H  | 7.706936  | -2.721035 | 0.308151  |
| H  | 7.514922  | -5.722512 | 0.871843  |
| H  | 8.534976  | -4.994818 | -0.353793 |
| H  | 9.802541  | -3.748304 | 1.431474  |
| H  | 9.858082  | -5.492452 | 1.706875  |
| H  | 8.774160  | -4.479392 | 2.666261  |
| H  | -6.788526 | -3.657580 | -1.181364 |
| H  | -5.659163 | -4.513560 | -0.150162 |
| H  | -7.578229 | -5.591261 | 1.054676  |
| H  | -8.705852 | -4.737787 | 0.019555  |
| H  | -7.762040 | -5.920191 | -1.995466 |
| H  | -8.360264 | -7.073475 | -0.798503 |
| H  | -6.625197 | -6.779542 | -0.953289 |
| 9e |           |           |           |
| C  | -4.855567 | -0.172703 | 1.262435  |
| C  | -3.630305 | -0.261576 | 0.595562  |
| C  | -3.334554 | -1.435289 | -0.102736 |
| C  | -4.234670 | -2.491277 | -0.108058 |

|   |            |           |           |
|---|------------|-----------|-----------|
| C | -5.459221  | -2.412886 | 0.554314  |
| C | -5.751613  | -1.228864 | 1.232810  |
| N | -2.789794  | 0.856961  | 0.600715  |
| C | -1.427822  | 0.889056  | 0.601251  |
| C | -0.717491  | 2.074596  | 0.302907  |
| C | 0.717800   | 2.074481  | 0.303115  |
| C | 1.427870   | 0.888846  | 0.601584  |
| C | 0.680244   | -0.254750 | 0.982919  |
| C | -0.680429  | -0.254647 | 0.982780  |
| C | -1.458379  | 3.294513  | -0.008554 |
| C | -0.697577  | 4.497261  | -0.404169 |
| C | 0.698482   | 4.497152  | -0.403953 |
| C | 1.458974   | 3.294292  | -0.008088 |
| C | -1.391919  | 5.651174  | -0.771040 |
| C | -0.697155  | 6.789380  | -1.141632 |
| C | 0.698650   | 6.789270  | -1.141419 |
| C | 1.393120   | 5.650956  | -0.770610 |
| N | 2.789849   | 0.856534  | 0.601363  |
| C | 3.630144   | -0.262118 | 0.596116  |
| C | 4.855463   | -0.173533 | 1.262926  |
| C | 5.751338   | -1.229840 | 1.233135  |
| C | 5.458731   | -2.413720 | 0.554493  |
| C | 4.234105   | -2.491841 | -0.107788 |
| C | 3.334145   | -1.435732 | -0.102262 |
| C | 6.455765   | -3.537272 | 0.488006  |
| C | 7.452314   | -3.374621 | -0.662573 |
| C | 8.471444   | -4.504359 | -0.742700 |
| C | 9.461533   | -4.330109 | -1.885715 |
| O | 2.693467   | 3.361953  | 0.038261  |
| O | -2.692885  | 3.362376  | 0.037282  |
| C | -6.456381  | -3.536349 | 0.488219  |
| C | -7.452885  | -3.374109 | -0.662459 |
| C | -8.472062  | -4.503839 | -0.742113 |
| C | -9.462220  | -4.329985 | -1.885128 |
| H | -1.238855  | 7.683738  | -1.431436 |
| H | 1.240579   | 7.683538  | -1.431069 |
| H | 2.476401   | 5.622466  | -0.754763 |
| H | -2.475210  | 5.622854  | -0.755528 |
| H | 1.212470   | -1.133625 | 1.326216  |
| H | -1.212851  | -1.133440 | 1.325956  |
| H | -3.207867  | 1.781563  | 0.473987  |
| H | 3.208114   | 1.781099  | 0.474974  |
| H | -5.091353  | 0.733160  | 1.811877  |
| H | -6.696762  | -1.136069 | 1.760859  |
| H | -3.983800  | -3.394312 | -0.658017 |
| H | -2.410877  | -1.510392 | -0.665767 |
| H | 5.091452   | 0.732233  | 1.812446  |
| H | 6.696535   | -1.137228 | 1.761134  |
| H | 3.983080   | -3.394765 | -0.657859 |
| H | 2.410427   | -1.510616 | -0.665264 |
| H | 5.927900   | -4.491469 | 0.375539  |
| H | 7.006588   | -3.596680 | 1.434364  |
| H | -7.007256  | -3.595312 | 1.434575  |
| H | -5.928606  | -4.490649 | 0.376180  |
| H | -6.900101  | -3.308314 | -1.608297 |
| H | -7.974199  | -2.414710 | -0.551642 |
| H | -7.944347  | -5.459584 | -0.854041 |
| H | -9.015378  | -4.568146 | 0.209311  |
| H | -10.027514 | -3.398521 | -1.779122 |
| H | -10.181678 | -5.152674 | -1.922142 |
| H | -8.947913  | -4.294293 | -2.850883 |

|   |           |           |           |
|---|-----------|-----------|-----------|
| H | 6.899570  | -3.308367 | -1.608405 |
| H | 7.973673  | -2.415302 | -0.551309 |
| H | 9.014808  | -4.569046 | 0.208671  |
| H | 7.943685  | -5.460042 | -0.854960 |
| H | 8.947178  | -4.294144 | -2.851433 |
| H | 10.181031 | -5.152751 | -1.923017 |
| H | 10.026796 | -3.398653 | -1.779459 |

9f

|   |            |           |           |
|---|------------|-----------|-----------|
| C | 4.589087   | -0.506485 | -1.548762 |
| C | 3.602042   | -0.377349 | -0.568241 |
| C | 3.584968   | -1.294418 | 0.486045  |
| C | 4.510295   | -2.327149 | 0.530133  |
| C | 5.493620   | -2.470266 | -0.448279 |
| C | 5.519474   | -1.531483 | -1.480268 |
| N | 2.715343   | 0.703256  | -0.649958 |
| C | 1.394040   | 0.733540  | -0.317442 |
| C | 0.697202   | 1.955392  | -0.170671 |
| C | -0.697182  | 1.955304  | 0.170560  |
| C | -1.393922  | 0.733433  | 0.317352  |
| C | -0.663479  | -0.470758 | 0.150278  |
| C | 0.663675   | -0.470702 | -0.150326 |
| C | 1.402633   | 3.214144  | -0.400462 |
| C | 0.671444   | 4.480233  | -0.189581 |
| C | -0.671865  | 4.480117  | 0.189590  |
| C | -1.402838  | 3.213892  | 0.400387  |
| C | 1.339310   | 5.691007  | -0.379989 |
| C | 0.671043   | 6.888064  | -0.190182 |
| C | -0.671844  | 6.887946  | 0.190344  |
| C | -1.339923  | 5.690772  | 0.380075  |
| N | -2.715239  | 0.703180  | 0.649824  |
| C | -3.601933  | -0.377437 | 0.568184  |
| C | -3.584812  | -1.294591 | -0.486025 |
| C | -4.510116  | -2.327343 | -0.530050 |
| C | -5.493473  | -2.470388 | 0.448339  |
| C | -5.519379  | -1.531517 | 1.480247  |
| C | -4.589002  | -0.506505 | 1.548689  |
| C | -6.521544  | -3.564542 | 0.366293  |
| C | -7.778825  | -3.146416 | -0.400188 |
| C | -8.824760  | -4.250894 | -0.485266 |
| C | -10.072789 | -3.831428 | -1.249116 |
| O | -2.581263  | 3.265787  | 0.773373  |
| O | 2.581058   | 3.266365  | -0.773410 |
| C | 6.521716   | -3.564391 | -0.366171 |
| C | 7.779017   | -3.146167 | 0.400223  |
| C | 8.824994   | -4.250603 | 0.485340  |
| C | 10.073053  | -3.831025 | 1.249077  |
| H | 1.192424   | 7.828170  | -0.337353 |
| H | -1.193372  | 7.827961  | 0.337575  |
| H | -2.381843  | 5.658807  | 0.676593  |
| H | 2.381236   | 5.659226  | -0.676510 |
| H | -1.175428  | -1.415650 | 0.283397  |
| H | 1.175690   | -1.415558 | -0.283441 |
| H | 3.087402   | 1.626432  | -0.883590 |
| H | -3.087315  | 1.626374  | 0.883339  |
| H | 4.608845   | 0.200247  | -2.372285 |
| H | 6.274327   | -1.614030 | -2.257506 |
| H | 4.475127   | -3.031616 | 1.356789  |
| H | 2.861419   | -1.183300 | 1.286082  |
| H | -2.861228  | -1.183533 | -1.286040 |
| H | -4.474907  | -3.031885 | -1.356641 |

|   |            |           |           |
|---|------------|-----------|-----------|
| H | -6.274255  | -1.614011 | 2.257468  |
| H | -4.608793  | 0.200295  | 2.372154  |
| H | -6.805679  | -3.877051 | 1.378225  |
| H | -6.081517  | -4.444631 | -0.117397 |
| H | 6.805822   | -3.876980 | -1.378086 |
| H | 6.081728   | -4.444450 | 0.117610  |
| H | 7.493736   | -2.828963 | 1.411367  |
| H | 8.215004   | -2.261347 | -0.080997 |
| H | 8.380241   | -5.132888 | 0.963098  |
| H | 9.102367   | -4.564033 | -0.529201 |
| H | 10.556973  | -2.971807 | 0.773540  |
| H | 10.806420  | -4.640832 | 1.296002  |
| H | 9.829094   | -3.543445 | 2.276814  |
| H | -8.214863  | -2.261570 | 0.080941  |
| H | -7.493508  | -2.829284 | -1.411344 |
| H | -8.379949  | -5.133205 | -0.962919 |
| H | -9.102182  | -4.564243 | 0.529287  |
| H | -10.556771 | -2.972187 | -0.773686 |
| H | -10.806121 | -4.641268 | -1.296016 |
| H | -9.828776  | -3.543931 | -2.276864 |

10a

|   |           |           |           |
|---|-----------|-----------|-----------|
| C | 7.868248  | -1.025642 | -0.455047 |
| C | 7.391746  | -2.269633 | -0.036074 |
| C | 6.033084  | -2.518485 | 0.057015  |
| C | 5.106463  | -1.522966 | -0.254321 |
| C | 5.572880  | -0.279189 | -0.684379 |
| C | 6.935901  | -0.040520 | -0.781618 |
| C | 3.661736  | -1.888331 | -0.144209 |
| O | 3.309173  | -3.048342 | -0.050499 |
| C | 9.342743  | -0.743102 | -0.516218 |
| C | 9.888094  | -0.176251 | 0.797806  |
| C | 11.382725 | 0.114569  | 0.748371  |
| C | 11.919838 | 0.684121  | 2.053877  |
| N | 2.799688  | -0.812162 | -0.149891 |
| C | 1.419556  | -0.805131 | -0.140463 |
| C | 0.715401  | 0.421648  | -0.154641 |
| C | -0.715401 | 0.421647  | -0.154641 |
| C | -1.419555 | -0.805133 | -0.140463 |
| C | -0.683661 | -2.006956 | -0.127105 |
| C | 0.683664  | -2.006955 | -0.127105 |
| C | -1.455302 | 1.694319  | -0.180927 |
| C | -0.696759 | 2.961671  | -0.208013 |
| C | 0.696755  | 2.961672  | -0.208013 |
| C | 1.455300  | 1.694321  | -0.180926 |
| C | 1.392787  | 4.170206  | -0.229817 |
| C | 0.697400  | 5.367506  | -0.252436 |
| C | -0.697408 | 5.367505  | -0.252436 |
| C | -1.392793 | 4.170204  | -0.229817 |
| O | 2.686654  | 1.755818  | -0.178264 |
| O | -2.686656 | 1.755813  | -0.178262 |
| N | -2.799687 | -0.812165 | -0.149892 |
| C | -3.661735 | -1.888333 | -0.144208 |
| C | -5.106462 | -1.522967 | -0.254320 |
| C | -6.033084 | -2.518485 | 0.057018  |
| C | -7.391745 | -2.269632 | -0.036071 |
| C | -7.868246 | -1.025642 | -0.455048 |
| C | -6.935899 | -0.040521 | -0.781622 |
| C | -5.572878 | -0.279191 | -0.684381 |
| C | -9.342741 | -0.743101 | -0.516219 |
| C | -9.888093 | -0.176252 | 0.797806  |



|   |            |           |           |
|---|------------|-----------|-----------|
| C | -11.382724 | 0.114569  | 0.748371  |
| C | -11.919836 | 0.684120  | 2.053877  |
| O | -3.309172  | -3.048343 | -0.050495 |
| H | 1.229616   | -2.938897 | -0.109846 |
| H | -1.229612  | -2.938898 | -0.109846 |
| H | -2.475893  | 4.140659  | -0.227156 |
| H | 2.475887   | 4.140662  | -0.227155 |
| H | 1.239304   | 6.307133  | -0.269251 |
| H | -1.239313  | 6.307131  | -0.269251 |
| H | -3.193956  | 0.128021  | -0.124256 |
| H | 3.193957   | 0.128023  | -0.124253 |
| H | 4.886217   | 0.510577  | -0.971812 |
| H | 7.283412   | 0.928284  | -1.128878 |
| H | 5.657800   | -3.487743 | 0.365288  |
| H | 8.099441   | -3.055547 | 0.212306  |
| H | -4.886215  | 0.510573  | -0.971817 |
| H | -7.283409  | 0.928282  | -1.128883 |
| H | -5.657800  | -3.487743 | 0.365293  |
| H | -8.099441  | -3.055545 | 0.212311  |
| H | 9.547182   | -0.033376 | -1.326234 |
| H | 9.882688   | -1.664616 | -0.762514 |
| H | -9.882687  | -1.664615 | -0.762517 |
| H | -9.547180  | -0.033374 | -1.326233 |
| H | 9.341297   | 0.742062  | 1.046791  |
| H | 9.675862   | -0.883531 | 1.609486  |
| H | -9.675860  | -0.883533 | 1.609485  |
| H | -9.341295  | 0.742061  | 1.046792  |
| H | -11.587064 | 0.815430  | -0.071009 |
| H | -11.922192 | -0.807929 | 0.499051  |
| H | 11.922193  | -0.807928 | 0.499052  |
| H | 11.587066  | 0.815430  | -0.071009 |
| H | -12.993003 | 0.884822  | 1.992715  |
| H | -11.758619 | -0.010852 | 2.884179  |
| H | -11.419991 | 1.623878  | 2.309646  |
| H | 12.993005  | 0.884824  | 1.992715  |
| H | 11.419992  | 1.623880  | 2.309645  |
| H | 11.758620  | -0.010850 | 2.884179  |

10b

|   |           |           |           |
|---|-----------|-----------|-----------|
| C | 5.567230  | -0.036144 | 0.013181  |
| C | 5.105404  | -1.241473 | -0.518668 |
| C | 6.035399  | -2.210718 | -0.896853 |
| C | 7.392600  | -1.973975 | -0.763182 |
| C | 7.864547  | -0.769867 | -0.235749 |
| C | 6.929227  | 0.190167  | 0.150226  |
| C | 3.662020  | -1.593541 | -0.678671 |
| O | 3.310593  | -2.740988 | -0.875030 |
| C | 9.336238  | -0.540055 | -0.037439 |
| C | 9.834791  | -1.071950 | 1.309406  |
| C | 11.327857 | -0.857847 | 1.522895  |
| C | 11.817507 | -1.390542 | 2.862160  |
| N | 2.799587  | -0.521454 | -0.589336 |
| C | 1.419538  | -0.513560 | -0.601129 |
| C | 0.715410  | 0.707347  | -0.480020 |
| C | -0.715411 | 0.707340  | -0.480015 |
| C | -1.419529 | -0.513573 | -0.601119 |
| C | -0.683648 | -1.709541 | -0.720869 |
| C | 0.683667  | -1.709535 | -0.720874 |
| C | 1.455221  | 1.972706  | -0.340814 |
| C | 0.696727  | 3.232644  | -0.201192 |
| C | -0.696758 | 3.232636  | -0.201185 |

|     |            |           |           |
|-----|------------|-----------|-----------|
| C   | -1.455237  | 1.972688  | -0.340805 |
| C   | -1.392773  | 4.434425  | -0.071759 |
| C   | -0.697433  | 5.624980  | 0.057388  |
| C   | 0.697375   | 5.624989  | 0.057381  |
| C   | 1.392729   | 4.434443  | -0.071773 |
| N   | -2.799578  | -0.521473 | -0.589318 |
| C   | -3.662009  | -1.593562 | -0.678644 |
| O   | -3.310581  | -2.741010 | -0.874998 |
| O   | 2.686606   | 2.034278  | -0.337643 |
| O   | -2.686622  | 2.034239  | -0.337606 |
| C   | -5.105393  | -1.241494 | -0.518643 |
| C   | -6.035388  | -2.210744 | -0.896816 |
| C   | -7.392589  | -1.974001 | -0.763149 |
| C   | -7.864537  | -0.769886 | -0.235731 |
| C   | -6.929218  | 0.190153  | 0.150233  |
| C   | -5.567221  | -0.036159 | 0.013191  |
| C   | -9.336228  | -0.540072 | -0.037426 |
| C   | -9.834782  | -1.071949 | 1.309427  |
| C   | -11.327848 | -0.857841 | 1.522913  |
| C   | -11.817499 | -1.390518 | 2.862184  |
| H   | -1.229568  | -2.636382 | -0.820089 |
| H   | 1.229594   | -2.636371 | -0.820098 |
| H   | 2.475825   | 4.405215  | -0.076952 |
| H   | -2.475870  | 4.405184  | -0.076927 |
| H   | -1.239375  | 6.559340  | 0.157912  |
| H   | 1.239306   | 6.559355  | 0.157899  |
| H   | 3.193655   | 0.417355  | -0.531462 |
| H   | -3.193648  | 0.417335  | -0.531448 |
| H   | -4.878217  | 0.734590  | 0.343550  |
| H   | -7.273121  | 1.131822  | 0.568341  |
| H   | -5.663638  | -3.147909 | -1.295394 |
| H   | -8.103259  | -2.734961 | -1.073262 |
| H   | 4.878226   | 0.734600  | 0.343549  |
| H   | 7.273130   | 1.131831  | 0.568347  |
| H   | 5.663650   | -3.147878 | -1.295442 |
| H   | 8.103270   | -2.734931 | -1.073304 |
| H   | -9.554235  | 0.531841  | -0.105551 |
| H   | -9.895082  | -1.026407 | -0.845435 |
| H   | 9.895093   | -1.026379 | -0.845455 |
| H   | 9.554245   | 0.531859  | -0.105550 |
| H   | -9.601539  | -2.141889 | 1.381081  |
| H   | -9.272559  | -0.586133 | 2.116976  |
| H   | 9.272568   | -0.586145 | 2.116962  |
| H   | 9.601547   | -2.141891 | 1.381046  |
| H   | 11.881899  | -1.342403 | 0.708928  |
| H   | 11.554182  | 0.213371  | 1.447221  |
| H   | -11.554171 | 0.213376  | 1.447224  |
| H   | -11.881890 | -1.342407 | 0.708951  |
| H   | 12.890583  | -1.224848 | 2.991696  |
| H   | 11.302692  | -0.900207 | 3.694607  |
| H   | 11.634473  | -2.466218 | 2.950056  |
| H   | -12.890575 | -1.224821 | 2.991718  |
| H   | -11.634467 | -2.466193 | 2.950095  |
| H   | -11.302684 | -0.900173 | 3.694625  |
| 10c |            |           |           |
| C   | -5.507372  | -0.398483 | 0.885607  |
| C   | -5.037511  | -1.620630 | 0.400476  |
| C   | -5.953925  | -2.641353 | 0.146819  |
| C   | -7.308638  | -2.437248 | 0.348224  |
| C   | -7.789368  | -1.215097 | 0.822317  |

|   |            |           |           |
|---|------------|-----------|-----------|
| C | -6.865170  | -0.205228 | 1.092373  |
| C | -3.595098  | -1.934853 | 0.168798  |
| O | -3.211159  | -3.080841 | 0.035488  |
| C | -9.262293  | -0.978404 | 1.001549  |
| C | -9.913833  | -0.362173 | -0.239927 |
| C | -11.406825 | -0.111156 | -0.069170 |
| C | -12.048451 | 0.508423  | -1.302737 |
| N | -2.774562  | -0.828185 | 0.111243  |
| C | -1.402507  | -0.769126 | -0.024168 |
| C | -0.747420  | 0.483830  | -0.070166 |
| C | 0.675681   | 0.538977  | -0.207155 |
| C | 1.421526   | -0.659910 | -0.293720 |
| C | 0.734553   | -1.889287 | -0.238740 |
| C | -0.625661  | -1.941935 | -0.108950 |
| C | -1.529491  | 1.726961  | 0.034069  |
| C | -0.820668  | 3.022449  | -0.000576 |
| C | 0.565210   | 3.076402  | -0.135688 |
| C | 1.365198   | 1.839385  | -0.246832 |
| C | -1.556991  | 4.202890  | 0.098909  |
| C | -0.909007  | 5.426199  | 0.064741  |
| C | 0.478145   | 5.480268  | -0.070754 |
| C | 1.213299   | 4.310997  | -0.171265 |
| N | 2.795124   | -0.613647 | -0.419915 |
| C | 3.694071   | -1.655169 | -0.510402 |
| O | 3.379787   | -2.828620 | -0.564654 |
| O | 2.586839   | 1.948597  | -0.371896 |
| O | -2.757119  | 1.741080  | 0.147541  |
| C | 5.127287   | -1.233480 | -0.547948 |
| C | 5.584492   | 0.035806  | -0.188014 |
| C | 6.939153   | 0.329730  | -0.237458 |
| C | 7.872463   | -0.624464 | -0.643254 |
| C | 7.406375   | -1.893110 | -0.994214 |
| C | 6.056660   | -2.196798 | -0.941799 |
| C | 9.342041   | -0.310715 | -0.651359 |
| C | 10.015181  | -0.614086 | 0.690366  |
| C | 11.504892  | -0.294787 | 0.697458  |
| C | 12.168776  | -0.592232 | 2.034552  |
| H | -1.134516  | -2.894287 | -0.076214 |
| H | 1.311833   | -2.799622 | -0.309205 |
| H | 2.291310   | 4.323686  | -0.279476 |
| H | -2.633355  | 4.131202  | 0.200412  |
| H | -1.482129  | 6.343987  | 0.142307  |
| H | 0.982936   | 6.440090  | -0.098514 |
| H | 3.148071   | 0.341006  | -0.482156 |
| H | -3.203739  | 0.096952  | 0.127654  |
| H | -4.825013  | 0.408841  | 1.131321  |
| H | -7.214215  | 0.746951  | 1.481616  |
| H | -5.574022  | -3.593801 | -0.205162 |
| H | -8.009075  | -3.241596 | 0.142038  |
| H | 4.899515   | 0.806999  | 0.149573  |
| H | 7.279420   | 1.321595  | 0.045972  |
| H | 5.690610   | -3.182711 | -1.205048 |
| H | 8.115183   | -2.651220 | -1.315248 |
| H | -9.425633  | -0.315313 | 1.859148  |
| H | -9.760351  | -1.925692 | 1.237488  |
| H | 9.836128   | -0.888681 | -1.440828 |
| H | 9.490285   | 0.747175  | -0.897086 |
| H | -9.406558  | 0.580586  | -0.480989 |
| H | -9.746341  | -1.023521 | -1.099432 |
| H | 9.511976   | -0.043615 | 1.481325  |
| H | 9.862972   | -1.672201 | 0.938027  |

|   |            |           |           |
|---|------------|-----------|-----------|
| H | 12.001026  | -0.868127 | -0.095888 |
| H | 11.648451  | 0.762708  | 0.441512  |
| H | -11.907275 | -1.057716 | 0.171083  |
| H | -11.565936 | 0.543629  | 0.797042  |
| H | 13.235971  | -0.354724 | 2.014280  |
| H | 11.713393  | -0.007477 | 2.840225  |
| H | 12.068811  | -1.649832 | 2.298628  |
| H | -13.118360 | 0.679767  | -1.155621 |
| H | -11.587776 | 1.471418  | -1.545257 |
| H | -11.932933 | -0.140937 | -2.176436 |

11a

|   |            |           |           |
|---|------------|-----------|-----------|
| C | 5.431474   | -1.961221 | -0.721108 |
| C | 4.926897   | -0.708328 | 0.009634  |
| C | 5.757590   | -0.432678 | 1.256440  |
| C | 7.240361   | -0.319428 | 0.917882  |
| C | 7.769014   | -1.558382 | 0.192474  |
| C | 6.915918   | -1.836264 | -1.045338 |
| C | 3.467263   | -0.820304 | 0.343915  |
| O | 2.969398   | -0.864023 | 1.427237  |
| C | 9.247300   | -1.442837 | -0.179884 |
| C | 10.197717  | -1.329698 | 1.005142  |
| O | 2.724508   | -0.914167 | -0.813453 |
| C | 1.362053   | -0.825087 | -0.710956 |
| C | 0.701558   | 0.391008  | -0.492845 |
| C | -0.714860  | 0.410930  | -0.483059 |
| C | -1.411443  | -0.787983 | -0.685834 |
| C | -0.731789  | -1.976621 | -0.907506 |
| C | 0.647052   | -1.994861 | -0.921505 |
| C | 1.481730   | 1.650415  | -0.322570 |
| C | 0.729185   | 2.927194  | -0.266938 |
| C | -0.665411  | 2.947942  | -0.265334 |
| C | -1.456336  | 1.694281  | -0.318368 |
| C | -1.342104  | 4.164817  | -0.192657 |
| C | -0.629019  | 5.350541  | -0.131426 |
| C | 0.765380   | 5.329685  | -0.132628 |
| C | 1.442352   | 4.123075  | -0.195262 |
| O | -2.669095  | 1.745054  | -0.245383 |
| O | 2.694968   | 1.662996  | -0.244148 |
| O | -2.777200  | -0.843298 | -0.759505 |
| C | -3.493263  | -0.684427 | 0.407986  |
| C | -4.956085  | -0.548358 | 0.099357  |
| C | -5.536324  | -1.887665 | -0.378983 |
| C | -7.029141  | -1.765884 | -0.668328 |
| C | -7.815366  | -1.239016 | 0.533427  |
| C | -7.212509  | 0.084649  | 1.005496  |
| C | -5.722782  | -0.024299 | 1.308160  |
| C | -9.308334  | -1.088354 | 0.241109  |
| C | -10.033807 | -2.390787 | -0.072058 |
| O | -2.976217  | -0.710068 | 1.482892  |
| H | -1.309853  | -2.879642 | -1.064681 |
| H | 1.197651   | -2.912662 | -1.091238 |
| H | 2.525076   | 4.075735  | -0.187975 |
| H | 1.321456   | 6.259724  | -0.080752 |
| H | -1.156944  | 6.296793  | -0.078541 |
| H | -2.425736  | 4.150172  | -0.183397 |
| H | -5.028372  | 0.170868  | -0.725678 |
| H | 5.004926   | 0.142087  | -0.680494 |
| H | -5.375436  | -2.642454 | 0.402215  |
| H | -5.001148  | -2.228141 | -1.270281 |
| H | -7.414393  | -2.741011 | -0.983004 |

|   |            |           |           |
|---|------------|-----------|-----------|
| H | -7.179540  | -1.081027 | -1.515609 |
| H | -7.703190  | -1.968013 | 1.352130  |
| H | -7.746686  | 0.437260  | 1.895003  |
| H | -7.373877  | 0.844035  | 0.226640  |
| H | -5.557981  | -0.703599 | 2.152469  |
| H | -5.316026  | 0.945803  | 1.608127  |
| H | 5.400998   | 0.480169  | 1.741750  |
| H | 5.598075   | -1.244912 | 1.975571  |
| H | 7.807447   | -0.142540 | 1.837016  |
| H | 7.404231   | 0.559500  | 0.276864  |
| H | 7.658452   | -2.417276 | 0.874054  |
| H | 7.264784   | -2.750400 | -1.539393 |
| H | 7.060088   | -1.018527 | -1.766054 |
| H | 4.850966   | -2.120361 | -1.633898 |
| H | 5.270028   | -2.837129 | -0.078350 |
| H | 9.522920   | -2.321351 | -0.776844 |
| H | 9.378152   | -0.575685 | -0.841645 |
| H | -9.782780  | -0.614570 | 1.109502  |
| H | -9.435816  | -0.384888 | -0.593040 |
| H | -9.666909  | -2.854119 | -0.992142 |
| H | -11.106701 | -2.221781 | -0.199510 |
| H | -9.907593  | -3.116533 | 0.738368  |
| H | 10.033220  | -0.412044 | 1.576373  |
| H | 11.239731  | -1.323558 | 0.673298  |
| H | 10.074252  | -2.174197 | 1.691427  |

11b

|   |            |           |           |
|---|------------|-----------|-----------|
| C | -5.917642  | 0.304867  | 1.154825  |
| C | -5.044453  | -0.388903 | 0.116262  |
| C | -5.642568  | -1.744786 | -0.287281 |
| C | -7.079601  | -1.587478 | -0.774085 |
| C | -7.970846  | -0.892216 | 0.256200  |
| C | -7.350685  | 0.447274  | 0.656071  |
| C | -3.636981  | -0.548464 | 0.613383  |
| O | -3.238081  | -0.397917 | 1.728467  |
| C | -9.407196  | -0.706717 | -0.233422 |
| C | -10.168376 | -2.000816 | -0.490746 |
| O | -2.816925  | -0.959185 | -0.413600 |
| C | -1.466555  | -0.975764 | -0.187300 |
| C | -0.697259  | 0.192851  | -0.106765 |
| C | 0.705660   | 0.082636  | 0.060303  |
| C | 1.281226   | -1.192792 | 0.134288  |
| C | 0.494468   | -2.332200 | 0.046362  |
| C | -0.871611  | -2.225317 | -0.106360 |
| C | -1.344471  | 1.530251  | -0.246103 |
| C | -0.470989  | 2.728231  | -0.233649 |
| C | 0.901364   | 2.621859  | -0.011064 |
| C | 1.547521   | 1.305453  | 0.205852  |
| C | -1.048762  | 3.982208  | -0.427561 |
| C | -0.257733  | 5.118861  | -0.406223 |
| C | 1.114797   | 5.012465  | -0.183128 |
| C | 1.692140   | 3.769707  | 0.017434  |
| O | 2.617505   | -1.417967 | 0.345242  |
| C | 3.507361   | -1.100489 | -0.652740 |
| O | 3.158814   | -0.695873 | -1.720704 |
| O | 2.726337   | 1.252467  | 0.494309  |
| O | -2.545949  | 1.664243  | -0.376625 |
| C | 4.912968   | -1.399690 | -0.207705 |
| C | 5.314258   | -0.585011 | 1.029616  |
| C | 6.739680   | -0.920555 | 1.452362  |
| C | 7.754532   | -0.715131 | 0.326948  |

|   |            |           |           |
|---|------------|-----------|-----------|
| C | 7.328493   | -1.515917 | -0.904921 |
| C | 5.905296   | -1.190392 | -1.345874 |
| C | 9.169131   | -1.055830 | 0.795392  |
| C | 10.271086  | -0.708444 | -0.197275 |
| H | -1.502709  | -3.103652 | -0.173232 |
| H | 0.981163   | -3.298507 | 0.108072  |
| H | 2.754909   | 3.657263  | 0.197238  |
| H | 1.731850   | 5.904569  | -0.165964 |
| H | -0.707731  | 6.093718  | -0.561361 |
| H | -2.118928  | 4.035157  | -0.590287 |
| H | -4.974061  | 0.234587  | -0.784186 |
| H | 4.914836   | -2.460858 | 0.083905  |
| H | -5.624038  | -2.414075 | 0.583372  |
| H | -5.025233  | -2.207985 | -1.062117 |
| H | -7.482233  | -2.573201 | -1.028151 |
| H | -7.086043  | -0.997560 | -1.702261 |
| H | -8.000251  | -1.528077 | 1.155900  |
| H | -7.966148  | 0.923891  | 1.427403  |
| H | -7.370169  | 1.119393  | -0.214143 |
| H | -5.897368  | -0.279657 | 2.082120  |
| H | -5.492763  | 1.282936  | 1.398183  |
| H | 5.619915   | -1.798568 | -2.209289 |
| H | 5.844574   | -0.146522 | -1.675528 |
| H | 8.014309   | -1.332486 | -1.737976 |
| H | 7.404771   | -2.588136 | -0.670000 |
| H | 7.736183   | 0.352001  | 0.053374  |
| H | 7.018649   | -0.309962 | 2.318829  |
| H | 6.786298   | -1.968334 | 1.783971  |
| H | 4.611562   | -0.775708 | 1.844138  |
| H | 5.232047   | 0.481149  | 0.792321  |
| H | 9.357703   | -0.526583 | 1.737894  |
| H | 9.213426   | -2.126581 | 1.037374  |
| H | -9.950966  | -0.114559 | 0.513123  |
| H | -9.393440  | -0.098657 | -1.148284 |
| H | -9.724592  | -2.583873 | -1.302484 |
| H | -11.206432 | -1.796972 | -0.767860 |
| H | -10.183250 | -2.633622 | 0.403029  |
| H | 10.186248  | -1.284319 | -1.123014 |
| H | 11.259031  | -0.914247 | 0.224130  |
| H | 10.239751  | 0.353390  | -0.463523 |

12a

|   |           |           |           |
|---|-----------|-----------|-----------|
| C | 2.619125  | -1.281472 | 0.000779  |
| C | 1.757549  | -0.185575 | -0.000055 |
| C | 2.278184  | 1.112505  | -0.000935 |
| C | 3.649279  | 1.298562  | -0.000903 |
| C | 4.510330  | 0.201303  | 0.000023  |
| C | 3.993690  | -1.088556 | 0.000875  |
| N | 0.379803  | -0.494340 | -0.000097 |
| N | -0.379779 | 0.494244  | 0.000320  |
| C | -1.757542 | 0.185530  | 0.000138  |
| C | -2.619074 | 1.281462  | 0.000891  |
| C | -3.993648 | 1.088607  | 0.000766  |
| C | -4.510343 | -0.201229 | -0.000123 |
| C | -3.649338 | -1.298525 | -0.000879 |
| C | -2.278235 | -1.112528 | -0.000751 |
| H | -4.056564 | -2.304368 | -0.001578 |
| H | -5.584291 | -0.355998 | -0.000234 |
| H | -4.661278 | 1.943528  | 0.001355  |
| H | -2.183740 | 2.274767  | 0.001572  |
| H | -1.589553 | -1.948552 | -0.001336 |

|   |          |           |           |
|---|----------|-----------|-----------|
| H | 1.589466 | 1.948501  | -0.001636 |
| H | 4.056462 | 2.304423  | -0.001634 |
| H | 5.584271 | 0.356116  | 0.000038  |
| H | 4.661356 | -1.943450 | 0.001573  |
| H | 2.183833 | -2.274796 | 0.001367  |

13a

|   |           |           |           |
|---|-----------|-----------|-----------|
| C | -2.329199 | -1.326111 | 0.000138  |
| C | -2.109376 | 0.055822  | 0.000094  |
| C | -3.198494 | 0.942866  | 0.000034  |
| C | -4.482960 | 0.403672  | -0.000053 |
| C | -4.718820 | -0.968100 | -0.000048 |
| C | -3.614343 | -1.827574 | 0.000067  |
| N | -0.831699 | 0.630916  | 0.000082  |
| N | 0.155040  | -0.161353 | 0.000056  |
| C | 1.405279  | 0.415617  | 0.000023  |
| C | 2.533005  | -0.476080 | 0.000002  |
| C | 3.845558  | 0.066321  | -0.000013 |
| C | 4.007428  | 1.477179  | -0.000018 |
| C | 2.936950  | 2.321686  | -0.000018 |
| C | 1.619228  | 1.808579  | -0.000002 |
| C | 2.385653  | -1.878633 | -0.000004 |
| C | 3.488017  | -2.699760 | -0.000027 |
| C | 4.787755  | -2.163103 | -0.000042 |
| C | 4.958352  | -0.801608 | -0.000034 |
| O | 0.616906  | 2.670611  | -0.000039 |
| C | -2.993691 | 2.428845  | 0.000006  |
| C | -6.114682 | -1.517218 | -0.000136 |
| H | -5.330666 | 1.083945  | -0.000097 |
| H | -1.469704 | -1.985079 | 0.000225  |
| H | -3.771411 | -2.902448 | 0.000118  |
| H | 5.015052  | 1.882469  | -0.000023 |
| H | 3.054596  | 3.399341  | -0.000030 |
| H | 1.385961  | -2.293859 | 0.000008  |
| H | 3.353180  | -3.776637 | -0.000037 |
| H | 5.647958  | -2.823772 | -0.000060 |
| H | 5.954881  | -0.369960 | -0.000045 |
| H | -0.215761 | 2.101767  | -0.000024 |
| H | -3.953284 | 2.949172  | 0.000646  |
| H | -2.431263 | 2.756307  | -0.879856 |
| H | -2.430123 | 2.756219  | 0.879156  |
| H | -6.858546 | -0.718084 | -0.000448 |
| H | -6.291878 | -2.142583 | 0.880790  |
| H | -6.291589 | -2.143029 | -0.880801 |

13b

|   |           |           |           |
|---|-----------|-----------|-----------|
| C | -4.888571 | -0.744666 | -0.010235 |
| C | -3.801454 | 0.155235  | -0.004755 |
| C | -2.473136 | -0.348209 | -0.004629 |
| C | -2.286515 | -1.746726 | -0.009916 |
| C | -3.364662 | -2.599447 | -0.015192 |
| C | -4.679323 | -2.100792 | -0.015401 |
| C | -4.004029 | 1.560488  | 0.000767  |
| C | -2.957495 | 2.434190  | 0.006165  |
| C | -1.625232 | 1.959186  | 0.006274  |
| C | -1.371477 | 0.574148  | 0.000943  |
| N | -0.104347 | 0.025196  | 0.000431  |
| N | 0.860832  | 0.843012  | 0.004638  |
| C | 2.170485  | 0.347999  | 0.003691  |
| C | 2.580435  | -1.005420 | 0.020367  |
| C | 3.950648  | -1.255749 | 0.018766  |

|   |           |           |           |
|---|-----------|-----------|-----------|
| C | 4.921312  | -0.255252 | -0.000062 |
| C | 4.491035  | 1.070683  | -0.011047 |
| C | 3.140691  | 1.358563  | -0.009374 |
| C | 6.380841  | -0.598352 | -0.034653 |
| C | 1.642965  | -2.173926 | 0.044084  |
| O | -0.650480 | 2.852822  | 0.011575  |
| H | 4.275258  | -2.293318 | 0.035334  |
| H | 2.797672  | 2.387894  | -0.015745 |
| H | 5.216634  | 1.878145  | -0.018639 |
| H | -5.022681 | 1.937185  | 0.000670  |
| H | -3.104961 | 3.508185  | 0.010418  |
| H | -1.276455 | -2.135182 | -0.009730 |
| H | -3.198515 | -3.671969 | -0.019256 |
| H | -5.520201 | -2.785856 | -0.019600 |
| H | -5.897070 | -0.341653 | -0.010291 |
| H | 0.198121  | 2.313168  | 0.010267  |
| H | 2.212108  | -3.106305 | 0.069773  |
| H | 0.991359  | -2.180637 | -0.833640 |
| H | 0.980599  | -2.138244 | 0.912917  |
| H | 6.576005  | -1.565591 | 0.434196  |
| H | 6.979735  | 0.158048  | 0.478405  |
| H | 6.741735  | -0.655630 | -1.067916 |

13c

|   |           |           |           |
|---|-----------|-----------|-----------|
| C | 4.665908  | -1.227347 | 0.005479  |
| C | 3.736854  | -0.166350 | -0.004132 |
| C | 2.337108  | -0.447092 | 0.000785  |
| C | 1.938313  | -1.802665 | 0.016163  |
| C | 2.872505  | -2.813984 | 0.025460  |
| C | 4.247560  | -2.534260 | 0.019971  |
| C | 4.190983  | 1.178536  | -0.018295 |
| C | 3.321451  | 2.228342  | -0.027068 |
| C | 1.936613  | 1.973705  | -0.022255 |
| C | 1.427425  | 0.665690  | -0.009439 |
| N | 0.040780  | 0.689240  | -0.008342 |
| N | -0.602737 | -0.389946 | 0.000192  |
| C | -2.003227 | -0.309688 | 0.001282  |
| C | -2.828386 | 0.840994  | 0.033247  |
| C | -4.206661 | 0.642443  | 0.032545  |
| C | -4.808509 | -0.614999 | -0.001189 |
| C | -3.977958 | -1.733776 | -0.027015 |
| C | -2.606351 | -1.574485 | -0.024696 |
| C | -6.301629 | -0.751664 | -0.035268 |
| C | -2.325683 | 2.253388  | 0.073437  |
| O | 1.108263  | 3.020323  | -0.030274 |
| H | -4.845571 | 1.521896  | 0.061951  |
| H | -1.946663 | -2.435013 | -0.041353 |
| H | -4.408403 | -2.730298 | -0.045992 |
| H | 5.261500  | 1.360844  | -0.021887 |
| H | 3.656777  | 3.258607  | -0.037531 |
| H | 0.882800  | -2.026962 | 0.020640  |
| H | 2.535565  | -3.845712 | 0.037407  |
| H | 4.970189  | -3.343129 | 0.027329  |
| H | 5.725043  | -0.986941 | 0.001307  |
| H | 0.217438  | 2.622241  | -0.027338 |
| H | -3.167688 | 2.947500  | 0.127712  |
| H | -1.743358 | 2.495436  | -0.821248 |
| H | -1.682420 | 2.426835  | 0.941315  |
| H | -6.791323 | 0.075880  | 0.483585  |
| H | -6.626529 | -1.686501 | 0.427590  |
| H | -6.667661 | -0.753048 | -1.068312 |



13d

|   |           |           |           |
|---|-----------|-----------|-----------|
| C | 4.640614  | 1.094151  | -0.159780 |
| C | 3.721359  | 0.031157  | -0.045156 |
| C | 2.320027  | 0.300060  | -0.058936 |
| C | 1.907336  | 1.644311  | -0.194082 |
| C | 2.832469  | 2.658315  | -0.305539 |
| C | 4.209761  | 2.391216  | -0.287283 |
| C | 4.185144  | -1.304761 | 0.083463  |
| C | 3.324492  | -2.356115 | 0.195584  |
| C | 1.937119  | -2.113677 | 0.185975  |
| C | 1.420226  | -0.813662 | 0.058984  |
| N | 0.037269  | -0.841937 | 0.054582  |
| N | -0.622562 | 0.225773  | 0.021136  |
| C | -2.016519 | 0.061124  | -0.031959 |
| C | -2.792992 | 1.185990  | 0.295004  |
| C | -4.179247 | 1.065070  | 0.247100  |
| C | -4.815856 | -0.114992 | -0.130484 |
| C | -4.020511 | -1.213236 | -0.471084 |
| C | -2.643319 | -1.127146 | -0.422883 |
| C | -6.311851 | -0.201096 | -0.203037 |
| C | -2.150980 | 2.479760  | 0.699243  |
| O | 1.117368  | -3.157378 | 0.308034  |
| H | -4.784859 | 1.927936  | 0.512263  |
| H | -2.027129 | -1.971221 | -0.709101 |
| H | -4.491323 | -2.140329 | -0.785623 |
| H | 5.257007  | -1.478962 | 0.092426  |
| H | 3.668842  | -3.378502 | 0.295887  |
| H | 0.849489  | 1.859182  | -0.205934 |
| H | 2.486500  | 3.681909  | -0.408781 |
| H | 4.924908  | 3.202074  | -0.374106 |
| H | 5.701952  | 0.864065  | -0.145781 |
| H | 0.223299  | -2.764165 | 0.283405  |
| H | -2.909787 | 3.228860  | 0.934850  |
| H | -1.519162 | 2.871170  | -0.103481 |
| H | -1.507158 | 2.352390  | 1.573333  |
| H | -6.785479 | 0.654446  | 0.282831  |
| H | -6.680451 | -1.112289 | 0.276884  |
| H | -6.652167 | -0.223191 | -1.244141 |

13e

|   |           |           |           |
|---|-----------|-----------|-----------|
| C | -4.977029 | -0.768787 | 0.000029  |
| C | -3.854468 | 0.073081  | 0.000050  |
| C | -2.557791 | -0.487639 | 0.000023  |
| C | -2.430238 | -1.883611 | -0.000027 |
| C | -3.548140 | -2.694977 | -0.000046 |
| C | -4.831791 | -2.140463 | -0.000018 |
| C | -4.003878 | 1.503121  | 0.000087  |
| C | -2.948845 | 2.346443  | 0.000106  |
| C | -1.588257 | 1.854099  | 0.000118  |
| C | -1.404374 | 0.401281  | 0.000052  |
| N | -0.207948 | -0.167938 | 0.000014  |
| N | 0.844761  | 0.583000  | 0.000014  |
| C | 2.133184  | 0.048459  | -0.000018 |
| C | 2.352690  | -1.329536 | 0.000017  |
| C | 3.643838  | -1.821792 | -0.000003 |
| C | 4.744523  | -0.961031 | -0.000060 |
| C | 4.498649  | 0.409325  | -0.000092 |
| C | 3.213250  | 0.944110  | -0.000074 |
| C | 2.991883  | 2.428124  | -0.000098 |
| C | 6.144328  | -1.502128 | -0.000105 |

|   |           |           |           |
|---|-----------|-----------|-----------|
| O | -0.618287 | 2.639945  | 0.000090  |
| H | 5.340743  | 1.096595  | -0.000135 |
| H | 1.498468  | -1.994856 | 0.000065  |
| H | 3.802346  | -2.896303 | 0.000028  |
| H | -5.014816 | 1.902892  | 0.000097  |
| H | -3.069213 | 3.423998  | 0.000123  |
| H | -1.436902 | -2.315246 | -0.000049 |
| H | -3.426607 | -3.773350 | -0.000084 |
| H | -5.704912 | -2.783807 | -0.000034 |
| H | -5.966556 | -0.321249 | 0.000048  |
| H | 0.665026  | 1.606066  | 0.000041  |
| H | 3.945206  | 2.958517  | -0.000271 |
| H | 2.426447  | 2.755695  | 0.879422  |
| H | 2.426160  | 2.755636  | -0.879453 |
| H | 6.882218  | -0.697250 | 0.000076  |
| H | 6.327939  | -2.125232 | -0.881311 |
| H | 6.327870  | -2.125572 | 0.880873  |

13f

|   |           |           |           |
|---|-----------|-----------|-----------|
| C | 3.153589  | 1.357743  | -0.002137 |
| C | 2.195485  | 0.336100  | 0.001877  |
| C | 2.605171  | -1.009750 | 0.007911  |
| C | 3.979108  | -1.252401 | 0.007368  |
| C | 4.945051  | -0.250817 | 0.000980  |
| C | 4.503712  | 1.072592  | -0.002086 |
| N | 0.873617  | 0.783293  | 0.002786  |
| N | -0.161847 | 0.010647  | 0.000563  |
| C | -1.371552 | 0.556648  | 0.000542  |
| C | -2.502618 | -0.359075 | -0.001724 |
| C | -3.812908 | 0.169850  | -0.002363 |
| C | -3.996272 | 1.595831  | -0.000683 |
| C | -2.961317 | 2.463497  | 0.001528  |
| C | -1.588728 | 2.003683  | 0.002331  |
| C | -2.342511 | -1.752301 | -0.003204 |
| C | -3.440871 | -2.590146 | -0.005339 |
| C | -4.737372 | -2.066686 | -0.006031 |
| C | -4.914850 | -0.698701 | -0.004531 |
| O | -0.638417 | 2.812854  | 0.004366  |
| C | 1.666447  | -2.179540 | 0.017225  |
| C | 6.409066  | -0.578653 | -0.016986 |
| H | 4.305484  | -2.289261 | 0.013685  |
| H | 2.815953  | 2.390036  | -0.003502 |
| H | 5.222316  | 1.886459  | -0.003439 |
| H | -5.016399 | 1.971606  | -0.001220 |
| H | -3.106825 | 3.537972  | 0.002820  |
| H | -1.340010 | -2.161816 | -0.002610 |
| H | -3.293521 | -3.665345 | -0.006467 |
| H | -5.594905 | -2.730647 | -0.007699 |
| H | -5.914737 | -0.274697 | -0.004997 |
| H | 0.665999  | 1.803166  | 0.003830  |
| H | 2.237674  | -3.110435 | 0.026928  |
| H | 1.012985  | -2.178711 | -0.859124 |
| H | 1.009368  | -2.162442 | 0.890666  |
| H | 6.581918  | -1.640356 | 0.170772  |
| H | 6.953055  | -0.008040 | 0.741419  |
| H | 6.854815  | -0.335143 | -0.987490 |

13g

|   |           |           |           |
|---|-----------|-----------|-----------|
| C | -2.731079 | -1.537676 | 0.580346  |
| C | -2.017013 | -0.459350 | 0.037718  |
| C | -2.726234 | 0.623059  | -0.532043 |

|   |           |           |           |
|---|-----------|-----------|-----------|
| C | -4.117862 | 0.586881  | -0.462106 |
| C | -4.832766 | -0.452890 | 0.126537  |
| C | -4.109308 | -1.531377 | 0.639491  |
| N | -0.631963 | -0.622838 | 0.063293  |
| N | 0.063029  | 0.443087  | 0.169971  |
| C | 1.396722  | 0.600063  | 0.176741  |
| C | 2.382727  | -0.425378 | 0.003564  |
| C | 3.743627  | -0.019103 | 0.034656  |
| C | 4.074135  | 1.367938  | 0.235434  |
| C | 3.142168  | 2.331765  | 0.397087  |
| C | 1.729649  | 2.012744  | 0.376668  |
| C | 2.089370  | -1.785976 | -0.195347 |
| C | 3.110914  | -2.706128 | -0.359327 |
| C | 4.446909  | -2.307512 | -0.327559 |
| C | 4.752793  | -0.973078 | -0.131432 |
| O | 0.835199  | 2.859211  | 0.513503  |
| C | -2.076232 | 1.753642  | -1.286545 |
| C | -6.330332 | -0.419600 | 0.202234  |
| H | -4.670025 | 1.408359  | -0.911958 |
| H | -2.158588 | -2.371440 | 0.971487  |
| H | -4.632970 | -2.374009 | 1.080871  |
| H | 5.129145  | 1.629504  | 0.253834  |
| H | 3.405652  | 3.372469  | 0.546434  |
| H | 1.055995  | -2.102156 | -0.216541 |
| H | 2.863147  | -3.751334 | -0.513354 |
| H | 5.239488  | -3.036749 | -0.455079 |
| H | 5.788441  | -0.646948 | -0.104478 |
| H | -0.373373 | 1.374303  | 0.316232  |
| H | -2.798565 | 2.197109  | -1.974520 |
| H | -1.224178 | 1.409146  | -1.879738 |
| H | -1.716026 | 2.560685  | -0.639063 |
| H | -6.750781 | 0.299683  | -0.503898 |
| H | -6.663789 | -0.131305 | 1.205443  |
| H | -6.761767 | -1.400892 | -0.013239 |

13h

|   |           |           |           |
|---|-----------|-----------|-----------|
| C | -2.594363 | -1.082505 | 0.434438  |
| C | -2.016475 | 0.134531  | 0.043012  |
| C | -2.853138 | 1.230202  | -0.261567 |
| C | -4.227825 | 1.049232  | -0.201727 |
| C | -4.814146 | -0.165846 | 0.157391  |
| C | -3.969717 | -1.226479 | 0.483675  |
| N | -0.650152 | 0.372233  | -0.032544 |
| N | 0.091607  | -0.666931 | -0.102571 |
| C | 1.428522  | -0.769665 | -0.094590 |
| C | 2.371927  | 0.300633  | 0.038985  |
| C | 3.747730  | -0.053006 | 0.055098  |
| C | 4.136001  | -1.435356 | -0.059576 |
| C | 3.245678  | -2.442128 | -0.187133 |
| C | 1.821713  | -2.177696 | -0.220235 |
| C | 2.022743  | 1.657942  | 0.148879  |
| C | 3.004676  | 2.626388  | 0.273842  |
| C | 4.354931  | 2.279160  | 0.290559  |
| C | 4.715591  | 0.948072  | 0.181405  |
| O | 0.964174  | -3.062073 | -0.339096 |
| C | -2.263562 | 2.552060  | -0.648844 |
| C | -6.305480 | -0.323142 | 0.182528  |
| H | -4.870566 | 1.892030  | -0.443680 |
| H | -1.975140 | -1.917236 | 0.750168  |
| H | -4.394179 | -2.174137 | 0.800916  |
| H | 5.200433  | -1.655250 | -0.041532 |

|   |           |           |           |
|---|-----------|-----------|-----------|
| H | 3.551707  | -3.478264 | -0.273945 |
| H | 0.977387  | 1.932566  | 0.133688  |
| H | 2.714275  | 3.668542  | 0.358401  |
| H | 5.116478  | 3.045266  | 0.387164  |
| H | 5.763360  | 0.662391  | 0.192279  |
| H | -0.307883 | -1.622317 | -0.205487 |
| H | -3.050220 | 3.280712  | -0.853922 |
| H | -1.632726 | 2.461636  | -1.537482 |
| H | -1.626848 | 2.945396  | 0.149390  |
| H | -6.797957 | 0.589914  | 0.526851  |
| H | -6.609051 | -1.142376 | 0.838205  |
| H | -6.691481 | -0.543782 | -0.819272 |

14a

|   |           |           |           |
|---|-----------|-----------|-----------|
| C | 7.039800  | 1.219696  | 0.000050  |
| C | 6.057007  | 0.207477  | 0.000027  |
| C | 4.682847  | 0.563199  | 0.000005  |
| C | 4.343298  | 1.930967  | -0.000004 |
| C | 5.322249  | 2.896686  | 0.000012  |
| C | 6.683029  | 2.545059  | 0.000045  |
| C | 6.411558  | -1.168287 | 0.000018  |
| C | 5.469667  | -2.154118 | 0.000007  |
| C | 4.093458  | -1.829363 | 0.000006  |
| C | 3.688412  | -0.477260 | -0.000003 |
| N | 2.375042  | -0.080021 | -0.000031 |
| N | 1.499676  | -0.996251 | -0.000019 |
| C | 0.163700  | -0.577232 | -0.000045 |
| C | -0.803025 | -1.591903 | 0.000010  |
| C | -2.147157 | -1.282145 | 0.000011  |
| C | -2.548377 | 0.058343  | -0.000051 |
| C | -1.582827 | 1.070328  | -0.000122 |
| C | -0.237003 | 0.763400  | -0.000116 |
| N | -3.886289 | 0.492327  | -0.000063 |
| N | -4.735561 | -0.423527 | 0.000058  |
| C | -6.076443 | 0.010640  | 0.000041  |
| C | -7.037181 | -1.000477 | 0.000016  |
| C | -8.387532 | -0.680100 | -0.000005 |
| C | -8.781147 | 0.652533  | 0.000013  |
| C | -7.821456 | 1.664906  | 0.000055  |
| C | -6.473915 | 1.352163  | 0.000068  |
| O | 3.223028  | -2.820881 | 0.000011  |
| H | -9.132049 | -1.468885 | -0.000032 |
| H | -6.696706 | -2.030154 | 0.000012  |
| H | -5.710782 | 2.120733  | 0.000104  |
| H | -8.133488 | 2.704194  | 0.000079  |
| H | -9.835907 | 0.907030  | 0.000001  |
| H | -2.906792 | -2.053875 | 0.000065  |
| H | -0.471308 | -2.625002 | 0.000046  |
| H | 0.518355  | 1.538588  | -0.000170 |
| H | -1.924847 | 2.099554  | -0.000179 |
| H | 7.465538  | -1.430600 | 0.000023  |
| H | 5.736604  | -3.204685 | -0.000004 |
| H | 3.296239  | 2.205723  | -0.000026 |
| H | 5.039607  | 3.944462  | -0.000002 |
| H | 7.443800  | 3.317989  | 0.000070  |
| H | 8.086208  | 0.929439  | 0.000076  |
| H | 2.317463  | -2.382231 | 0.000010  |

14b

|   |          |          |           |
|---|----------|----------|-----------|
| C | 6.763520 | 1.688988 | -0.000112 |
| C | 5.926155 | 0.553512 | -0.000006 |

|   |           |           |           |
|---|-----------|-----------|-----------|
| C | 4.516622  | 0.721030  | -0.000101 |
| C | 3.995515  | 2.030496  | -0.000331 |
| C | 4.835309  | 3.119299  | -0.000424 |
| C | 6.231080  | 2.954051  | -0.000307 |
| C | 6.462816  | -0.761908 | 0.000133  |
| C | 5.662276  | -1.865618 | 0.000222  |
| C | 4.255009  | -1.729038 | 0.000168  |
| C | 3.671486  | -0.443856 | 0.000008  |
| N | 2.316477  | -0.226395 | -0.000126 |
| N | 1.571890  | -1.251691 | 0.000074  |
| C | 0.192035  | -1.015607 | 0.000092  |
| C | -0.629208 | -2.144810 | -0.000163 |
| C | -2.005309 | -2.001039 | -0.000099 |
| C | -2.579082 | -0.729913 | 0.000135  |
| C | -1.753468 | 0.405283  | 0.000592  |
| C | -0.384496 | 0.265451  | 0.000590  |
| N | -3.984865 | -0.693448 | -0.000006 |
| N | -4.480273 | 0.453269  | -0.000507 |
| C | -5.889181 | 0.491516  | -0.000219 |
| C | -6.456802 | 1.765582  | 0.000524  |
| C | -7.836469 | 1.914888  | 0.000793  |
| C | -8.652902 | 0.790411  | 0.000186  |
| C | -8.086700 | -0.484496 | -0.000685 |
| C | -6.712153 | -0.640057 | -0.000881 |
| O | 3.525998  | -2.828938 | 0.000336  |
| H | -8.274559 | 2.907148  | 0.001458  |
| H | -5.791719 | 2.622215  | 0.000888  |
| H | -6.249701 | -1.619458 | -0.001558 |
| H | -8.728065 | -1.359790 | -0.001236 |
| H | -9.732057 | 0.903056  | 0.000311  |
| H | -2.663931 | -2.862201 | -0.000249 |
| H | -0.170417 | -3.127545 | -0.000382 |
| H | 0.267625  | 1.129763  | 0.001054  |
| H | -2.220118 | 1.382777  | 0.000975  |
| H | 7.542513  | -0.879758 | 0.000180  |
| H | 6.068125  | -2.870707 | 0.000315  |
| H | 2.920953  | 2.161070  | -0.000462 |
| H | 4.414255  | 4.119480  | -0.000603 |
| H | 6.880827  | 3.822431  | -0.000383 |
| H | 7.839532  | 1.542510  | -0.000023 |
| H | 2.569844  | -2.516625 | 0.000297  |

14c

|   |           |           |           |
|---|-----------|-----------|-----------|
| C | -6.490280 | 1.350821  | 0.000030  |
| C | -6.093339 | 0.009218  | -0.000021 |
| C | -7.055451 | -1.000510 | -0.000040 |
| C | -8.405596 | -0.678929 | -0.000009 |
| C | -8.798564 | 0.653879  | 0.000042  |
| C | -7.837666 | 1.664930  | 0.000062  |
| N | -4.752376 | -0.425963 | -0.000055 |
| N | -3.902948 | 0.490289  | -0.000045 |
| C | -2.566232 | 0.060360  | -0.000033 |
| C | -2.159700 | -1.279608 | -0.000038 |
| C | -0.817816 | -1.592783 | -0.000029 |
| C | 0.144670  | -0.572684 | -0.000014 |
| C | -0.252185 | 0.766127  | -0.000009 |
| C | -1.600018 | 1.069294  | -0.000018 |
| N | 1.480733  | -0.948331 | -0.000006 |
| N | 2.433121  | -0.066708 | 0.000007  |
| C | 3.690137  | -0.466218 | 0.000020  |
| C | 4.713172  | 0.573430  | 0.000004  |

|   |           |           |           |
|---|-----------|-----------|-----------|
| C | 6.073303  | 0.195416  | 0.000015  |
| C | 6.418449  | -1.202249 | 0.000045  |
| C | 5.491996  | -2.184017 | 0.000063  |
| C | 4.075046  | -1.885291 | 0.000049  |
| C | 4.394598  | 1.937209  | -0.000025 |
| C | 5.390779  | 2.895281  | -0.000043 |
| C | 6.737152  | 2.522026  | -0.000031 |
| C | 7.069532  | 1.182297  | -0.000003 |
| O | 3.224274  | -2.792773 | 0.000075  |
| H | -9.150620 | -1.467304 | -0.000025 |
| H | -6.716238 | -2.030631 | -0.000079 |
| H | -5.726688 | 2.118949  | 0.000045  |
| H | -8.148413 | 2.704662  | 0.000102  |
| H | -9.853103 | 0.909293  | 0.000067  |
| H | -2.917468 | -2.053292 | -0.000051 |
| H | -0.495857 | -2.629781 | -0.000033 |
| H | 0.500965  | 1.542977  | 0.000001  |
| H | -1.939311 | 2.099283  | -0.000015 |
| H | 7.475021  | -1.458116 | 0.000055  |
| H | 5.760941  | -3.234290 | 0.000088  |
| H | 3.351537  | 2.228894  | -0.000034 |
| H | 5.122047  | 3.946570  | -0.000065 |
| H | 7.514071  | 3.278629  | -0.000045 |
| H | 8.111101  | 0.875027  | 0.000006  |
| H | 1.776179  | -1.941691 | -0.000017 |

14d

|   |           |           |           |
|---|-----------|-----------|-----------|
| C | -6.729389 | -0.638459 | -0.000813 |
| C | -5.909050 | 0.494938  | 0.000146  |
| C | -6.480820 | 1.767099  | 0.001252  |
| C | -7.860956 | 1.912607  | 0.001541  |
| C | -8.674675 | 0.786183  | 0.000626  |
| C | -8.104526 | -0.486829 | -0.000576 |
| N | -4.499704 | 0.460416  | 0.000024  |
| N | -4.001873 | -0.685601 | 0.000037  |
| C | -2.598129 | -0.722582 | -0.000261 |
| C | -2.020793 | -1.992894 | -0.000182 |
| C | -0.646663 | -2.141670 | -0.000341 |
| C | 0.171120  | -1.008766 | -0.000587 |
| C | -0.399714 | 0.271704  | -0.000709 |
| C | -1.770015 | 0.408813  | -0.000546 |
| N | 1.545294  | -1.202538 | -0.000662 |
| N | 2.373146  | -0.203113 | -0.000570 |
| C | 3.671898  | -0.434451 | -0.000294 |
| C | 4.549843  | 0.730320  | -0.000286 |
| C | 5.947789  | 0.533269  | 0.000759  |
| C | 6.473088  | -0.807046 | 0.001641  |
| C | 5.683253  | -1.901671 | 0.001409  |
| C | 4.239571  | -1.790893 | 0.000234  |
| C | 4.055489  | 2.040716  | -0.001299 |
| C | 4.917952  | 3.120703  | -0.001200 |
| C | 6.301616  | 2.926472  | -0.000098 |
| C | 6.806499  | 1.641833  | 0.000856  |
| O | 3.515180  | -2.802268 | -0.000149 |
| H | -8.301583 | 2.903799  | 0.002452  |
| H | -5.818289 | 2.625747  | 0.001906  |
| H | -6.264445 | -1.616694 | -0.001723 |
| H | -8.743216 | -1.364139 | -0.001345 |
| H | -9.754141 | 0.895844  | 0.000815  |
| H | -2.677520 | -2.855516 | 0.000060  |
| H | -0.198433 | -3.130021 | -0.000250 |

|   |           |           |           |
|---|-----------|-----------|-----------|
| H | 0.251230  | 1.136545  | -0.000890 |
| H | -2.233842 | 1.387634  | -0.000612 |
| H | 7.554081  | -0.922075 | 0.002483  |
| H | 6.087101  | -2.907795 | 0.002019  |
| H | 2.983214  | 2.193093  | -0.002187 |
| H | 4.514385  | 4.127929  | -0.001999 |
| H | 6.972942  | 3.778192  | -0.000023 |
| H | 7.879308  | 1.473389  | 0.001680  |
| H | 1.969407  | -2.148299 | -0.000615 |

15a

|   |           |           |           |
|---|-----------|-----------|-----------|
| C | -6.125196 | 1.760472  | 0.000031  |
| C | -5.788776 | 0.402190  | 0.000000  |
| C | -6.791086 | -0.584534 | -0.000036 |
| C | -8.120013 | -0.165299 | -0.000040 |
| C | -8.453289 | 1.182350  | -0.000011 |
| C | -7.451156 | 2.149965  | 0.000025  |
| N | -4.461194 | -0.066502 | 0.000003  |
| N | -3.582583 | 0.822747  | 0.000016  |
| C | -2.258043 | 0.350899  | 0.000018  |
| C | -1.894646 | -0.999339 | 0.000026  |
| C | -0.564763 | -1.384650 | 0.000027  |
| C | 0.426229  | -0.377481 | 0.000018  |
| C | 0.065644  | 0.974255  | 0.000010  |
| C | -1.265489 | 1.334426  | 0.000011  |
| N | 1.754451  | -0.814212 | 0.000018  |
| N | 2.651387  | 0.082792  | 0.000016  |
| C | 3.953127  | -0.350399 | 0.000015  |
| C | 4.976684  | 0.661292  | -0.000011 |
| C | 6.340173  | 0.266870  | -0.000022 |
| C | 6.655940  | -1.118455 | -0.000006 |
| C | 5.686473  | -2.077371 | 0.000021  |
| C | 4.320194  | -1.713581 | 0.000033  |
| C | 4.675311  | 2.037989  | -0.000029 |
| C | 5.680813  | 2.975944  | -0.000055 |
| C | 7.031137  | 2.586152  | -0.000065 |
| C | 7.350878  | 1.251309  | -0.000049 |
| O | 3.419062  | -2.677938 | 0.000065  |
| H | -8.906415 | -0.913960 | -0.000068 |
| C | -6.449852 | -2.045180 | -0.000069 |
| H | -5.320311 | 2.485466  | 0.000058  |
| H | -7.708737 | 3.203829  | 0.000050  |
| H | -9.496956 | 1.479741  | -0.000015 |
| H | -2.682119 | -1.743992 | 0.000033  |
| C | -0.189219 | -2.837176 | 0.000036  |
| H | 0.850505  | 1.719773  | 0.000004  |
| H | -1.571541 | 2.374667  | 0.000005  |
| H | 7.702101  | -1.410401 | -0.000014 |
| H | 5.923696  | -3.135073 | 0.000035  |
| H | 3.636286  | 2.341765  | -0.000021 |
| H | 5.427750  | 4.031236  | -0.000068 |
| H | 7.813360  | 3.337387  | -0.000086 |
| H | 8.388804  | 0.931964  | -0.000056 |
| H | 2.527481  | -2.203906 | 0.000080  |
| H | -1.083157 | -3.462968 | 0.000049  |
| H | 0.407665  | -3.096453 | -0.879806 |
| H | 0.407679  | -3.096437 | 0.879873  |
| H | -7.359042 | -2.650105 | -0.000090 |
| H | -5.855212 | -2.313334 | -0.877019 |
| H | -5.855224 | -2.313376 | 0.876876  |

## 15b

|   |           |           |           |
|---|-----------|-----------|-----------|
| C | 6.661831  | -1.164213 | 0.000168  |
| C | 5.831182  | -0.036090 | 0.000086  |
| C | 6.400577  | 1.260862  | -0.000008 |
| C | 7.792114  | 1.340608  | -0.000012 |
| C | 8.607770  | 0.215406  | 0.000071  |
| C | 8.039833  | -1.052040 | 0.000161  |
| N | 4.470508  | -0.381129 | 0.000104  |
| N | 3.637733  | 0.552511  | 0.000031  |
| C | 2.292830  | 0.130248  | 0.000051  |
| C | 1.882406  | -1.205711 | 0.000141  |
| C | 0.539723  | -1.544907 | 0.000144  |
| C | -0.415424 | -0.504186 | 0.000055  |
| C | -0.007766 | 0.834010  | -0.000031 |
| C | 1.335312  | 1.147785  | -0.000033 |
| N | -1.757913 | -0.894785 | 0.000056  |
| N | -2.625123 | 0.030756  | -0.000014 |
| C | -3.940236 | -0.361885 | 0.000007  |
| C | -4.932480 | 0.680433  | -0.000139 |
| C | -6.307494 | 0.327567  | -0.000161 |
| C | -6.665580 | -1.047327 | -0.000034 |
| C | -5.725717 | -2.035115 | 0.000111  |
| C | -4.348893 | -1.713108 | 0.000140  |
| C | -4.589727 | 2.047476  | -0.000270 |
| C | -5.566414 | 3.015436  | -0.000411 |
| C | -6.928014 | 2.666726  | -0.000431 |
| C | -7.287841 | 1.342201  | -0.000308 |
| O | -3.478237 | -2.705065 | 0.000302  |
| H | 8.248740  | 2.326024  | -0.000083 |
| C | 5.610723  | 2.533656  | -0.000102 |
| H | 6.173408  | -2.132290 | 0.000237  |
| H | 8.662976  | -1.939453 | 0.000226  |
| H | 9.686461  | 0.333373  | 0.000063  |
| H | 2.644466  | -1.976237 | 0.000205  |
| C | 0.114349  | -2.983565 | 0.000239  |
| H | -0.766236 | 1.606438  | -0.000099 |
| H | 1.674684  | 2.177733  | -0.000103 |
| H | -7.720193 | -1.307048 | -0.000052 |
| H | -5.994844 | -3.085163 | 0.000215  |
| H | -3.541927 | 2.319519  | -0.000255 |
| H | -5.281484 | 4.062595  | -0.000509 |
| H | -7.687110 | 3.441329  | -0.000543 |
| H | -8.334948 | 1.054417  | -0.000322 |
| H | -2.572430 | -2.258198 | 0.000329  |
| H | 0.986224  | -3.639655 | 0.000303  |
| H | -0.491239 | -3.221942 | 0.880075  |
| H | -0.491205 | -3.222069 | -0.879585 |
| H | 6.288840  | 3.390744  | -0.000163 |
| H | 4.953450  | 2.596595  | -0.870469 |
| H | 4.953446  | 2.596722  | 0.870254  |

## 15c

|   |           |           |           |
|---|-----------|-----------|-----------|
| C | -6.191620 | 1.869718  | 0.000027  |
| C | -5.726526 | 0.548273  | -0.000087 |
| C | -6.649406 | -0.526337 | -0.000216 |
| C | -8.003681 | -0.196373 | -0.000223 |
| C | -8.455368 | 1.117889  | -0.000108 |
| C | -7.542478 | 2.164480  | 0.000019  |
| N | -4.324228 | 0.481170  | -0.000056 |
| N | -3.801541 | -0.655279 | -0.000133 |
| C | -2.391910 | -0.647904 | -0.000102 |



|   |           |           |           |
|---|-----------|-----------|-----------|
| C | -1.603702 | 0.506695  | -0.000002 |
| C | -0.217858 | 0.464656  | 0.000026  |
| C | 0.398201  | -0.815679 | -0.000051 |
| C | -0.398393 | -1.969631 | -0.000151 |
| C | -1.775193 | -1.897376 | -0.000177 |
| N | 1.765512  | -1.101299 | -0.000043 |
| N | 2.596422  | -0.143830 | 0.000041  |
| C | 3.928168  | -0.493740 | 0.000060  |
| C | 4.880727  | 0.583796  | 0.000151  |
| C | 6.268760  | 0.283424  | 0.000172  |
| C | 6.678815  | -1.076359 | 0.000102  |
| C | 5.775811  | -2.097488 | 0.000015  |
| C | 4.387521  | -1.827366 | -0.000006 |
| C | 4.488104  | 1.938039  | 0.000220  |
| C | 5.428013  | 2.941856  | 0.000306  |
| C | 6.801781  | 2.644421  | 0.000328  |
| C | 7.210223  | 1.334177  | 0.000261  |
| O | 3.558456  | -2.855015 | -0.000089 |
| H | -8.728125 | -1.005509 | -0.000322 |
| C | -6.265918 | -1.974312 | -0.000348 |
| H | -5.442032 | 2.653179  | 0.000122  |
| H | -7.879612 | 3.195060  | 0.000109  |
| H | -9.521565 | 1.319641  | -0.000118 |
| H | -2.111849 | 1.464235  | 0.000054  |
| C | 0.532358  | 1.762332  | 0.000136  |
| H | 0.103788  | -2.930884 | -0.000208 |
| H | -2.391796 | -2.788827 | -0.000254 |
| H | 7.742401  | -1.296280 | 0.000118  |
| H | 6.082794  | -3.137130 | -0.000038 |
| H | 3.431528  | 2.172522  | 0.000203  |
| H | 5.103991  | 3.977629  | 0.000359  |
| H | 7.531471  | 3.446788  | 0.000396  |
| H | 8.267310  | 1.085437  | 0.000276  |
| H | 2.637302  | -2.447031 | -0.000087 |
| H | -0.174369 | 2.595110  | 0.000179  |
| H | 1.182717  | 1.848316  | 0.874364  |
| H | 1.182757  | 1.848441  | -0.874051 |
| H | -7.164676 | -2.596096 | -0.000438 |
| H | -5.655684 | -2.226398 | -0.870743 |
| H | -5.655739 | -2.226571 | 0.870036  |

15d

|   |           |           |           |
|---|-----------|-----------|-----------|
| C | -6.495383 | -1.085446 | -0.000099 |
| C | -5.772419 | 0.112652  | -0.000006 |
| C | -6.437845 | 1.351721  | 0.000081  |
| C | -7.831448 | 1.343605  | 0.000073  |
| C | -8.548273 | 0.154804  | -0.000019 |
| C | -7.877140 | -1.065869 | -0.000106 |
| N | -4.365532 | 0.166778  | 0.000007  |
| N | -3.790106 | -0.942813 | -0.000077 |
| C | -2.384919 | -0.885065 | -0.000067 |
| C | -1.636837 | 0.296556  | 0.000025  |
| C | -0.250716 | 0.302366  | 0.000030  |
| C | 0.409203  | -0.956437 | -0.000063 |
| C | -0.346987 | -2.137256 | -0.000155 |
| C | -1.725461 | -2.112582 | -0.000158 |
| N | 1.785568  | -1.194142 | -0.000075 |
| N | 2.581760  | -0.207379 | 0.000011  |
| C | 3.925041  | -0.508210 | -0.000018 |
| C | 4.837442  | 0.603729  | 0.000058  |
| C | 6.235493  | 0.354397  | 0.000027  |

|   |           |           |           |
|---|-----------|-----------|-----------|
| C | 6.695204  | -0.989464 | -0.000078 |
| C | 5.830476  | -2.043183 | -0.000150 |
| C | 4.433252  | -1.824210 | -0.000121 |
| C | 4.395244  | 1.942527  | 0.000161  |
| C | 5.297618  | 2.980217  | 0.000231  |
| C | 6.681323  | 2.733314  | 0.000202  |
| C | 7.137760  | 1.438963  | 0.000101  |
| O | 3.642390  | -2.881365 | -0.000189 |
| H | -8.361732 | 2.291110  | 0.000139  |
| C | -5.680368 | 2.646334  | 0.000182  |
| H | -5.940736 | -2.015907 | -0.000164 |
| H | -8.434574 | -1.996553 | -0.000177 |
| H | -9.633174 | 0.179504  | -0.000024 |
| H | -2.176784 | 1.236597  | 0.000094  |
| C | 0.454182  | 1.625192  | 0.000131  |
| H | 0.188131  | -3.080540 | -0.000224 |
| H | -2.312982 | -3.023360 | -0.000228 |
| H | 7.766168  | -1.169989 | -0.000100 |
| H | 6.175423  | -3.070832 | -0.000229 |
| H | 3.330771  | 2.137684  | 0.000184  |
| H | 4.935929  | 4.003431  | 0.000311  |
| H | 7.381084  | 3.561920  | 0.000258  |
| H | 8.203279  | 1.229269  | 0.000077  |
| H | 2.706803  | -2.508019 | -0.000143 |
| H | -0.280700 | 2.433310  | 0.000184  |
| H | 1.101146  | 1.733623  | 0.874357  |
| H | 1.101161  | 1.733751  | -0.874068 |
| H | -6.370436 | 3.492676  | 0.000239  |
| H | -5.033198 | 2.727034  | 0.877206  |
| H | -5.033186 | 2.727163  | -0.876822 |

15e

|   |           |           |           |
|---|-----------|-----------|-----------|
| C | 7.430651  | -0.772192 | -0.000144 |
| C | 6.345036  | 0.128881  | -0.000113 |
| C | 5.016397  | -0.372102 | -0.000125 |
| C | 4.826634  | -1.769253 | -0.000168 |
| C | 5.903666  | -2.624259 | -0.000198 |
| C | 7.218735  | -2.128267 | -0.000186 |
| C | 6.550677  | 1.534307  | -0.000070 |
| C | 5.507597  | 2.411989  | -0.000041 |
| C | 4.174158  | 1.940847  | -0.000052 |
| C | 3.915879  | 0.554008  | -0.000093 |
| N | 2.650908  | 0.011845  | -0.000100 |
| N | 1.685893  | 0.834526  | -0.000072 |
| C | 0.378752  | 0.342422  | -0.000054 |
| C | -0.030385 | -1.012367 | -0.000057 |
| C | -1.399103 | -1.256707 | -0.000027 |
| C | -2.354160 | -0.241130 | 0.000005  |
| C | -1.937741 | 1.093633  | 0.000004  |
| C | -0.589767 | 1.363649  | -0.000025 |
| N | -3.693987 | -0.667990 | 0.000040  |
| N | -4.537410 | 0.254669  | 0.000090  |
| C | -5.882327 | -0.161116 | 0.000137  |
| C | -6.271279 | -1.505200 | 0.000096  |
| C | -7.611351 | -1.842676 | 0.000151  |
| C | -8.574830 | -0.836512 | 0.000248  |
| C | -8.189428 | 0.497130  | 0.000287  |
| C | -6.845092 | 0.864386  | 0.000232  |
| C | -6.446246 | 2.310287  | 0.000279  |
| C | 0.902910  | -2.184395 | -0.000087 |
| O | 3.202298  | 2.834507  | -0.000023 |

|   |           |           |           |
|---|-----------|-----------|-----------|
| H | -8.946155 | 1.275747  | 0.000362  |
| H | -5.495486 | -2.261195 | 0.000022  |
| H | -7.910040 | -2.885613 | 0.000119  |
| H | -9.629322 | -1.092848 | 0.000292  |
| H | -1.761537 | -2.279844 | -0.000025 |
| H | -0.235524 | 2.389183  | -0.000026 |
| H | -2.678082 | 1.883282  | 0.000027  |
| H | 7.570441  | 1.907974  | -0.000062 |
| H | 5.658714  | 3.485391  | -0.000009 |
| H | 3.816055  | -2.156281 | -0.000176 |
| H | 5.735394  | -3.696387 | -0.000231 |
| H | 8.058309  | -2.814841 | -0.000210 |
| H | 8.439823  | -0.371053 | -0.000135 |
| H | 2.351141  | 2.295945  | -0.000039 |
| H | 0.328559  | -3.113583 | -0.000083 |
| H | 1.559094  | -2.172790 | -0.874197 |
| H | 1.559132  | -2.172806 | 0.873994  |
| H | -7.330446 | 2.951119  | 0.000351  |
| H | -5.841249 | 2.554470  | 0.877121  |
| H | -5.841333 | 2.554550  | -0.876599 |

15f

|   |           |           |           |
|---|-----------|-----------|-----------|
| C | -7.380138 | 0.883655  | -0.000150 |
| C | -6.328652 | -0.057159 | -0.000141 |
| C | -4.982395 | 0.394126  | -0.000118 |
| C | -4.741139 | 1.783416  | -0.000104 |
| C | -5.785592 | 2.677772  | -0.000113 |
| C | -7.118141 | 2.230976  | -0.000136 |
| C | -6.585648 | -1.454133 | -0.000155 |
| C | -5.575300 | -2.369437 | -0.000147 |
| C | -4.225407 | -1.947669 | -0.000125 |
| C | -3.916709 | -0.571567 | -0.000108 |
| N | -2.632725 | -0.075207 | -0.000074 |
| N | -1.697741 | -0.931511 | -0.000059 |
| C | -0.373890 | -0.485078 | -0.000027 |
| C | 0.081820  | 0.854840  | 0.000002  |
| C | 1.458085  | 1.052285  | 0.000041  |
| C | 2.377799  | 0.004808  | 0.000050  |
| C | 1.915811  | -1.314288 | 0.000019  |
| C | 0.559044  | -1.538313 | -0.000018 |
| N | 3.735177  | 0.384718  | 0.000094  |
| N | 4.534932  | -0.577299 | 0.000097  |
| C | 5.906572  | -0.278590 | 0.000140  |
| C | 6.698588  | -1.434155 | 0.000149  |
| C | 8.079627  | -1.368378 | 0.000191  |
| C | 8.689685  | -0.120730 | 0.000225  |
| C | 7.912457  | 1.031375  | 0.000215  |
| C | 6.519050  | 0.998600  | 0.000174  |
| C | 5.773118  | 2.297639  | 0.000167  |
| C | -0.810303 | 2.058518  | -0.000004 |
| O | -3.286801 | -2.876516 | -0.000122 |
| H | 8.402390  | 2.000666  | 0.000242  |
| H | 6.177628  | -2.385101 | 0.000121  |
| H | 8.672537  | -2.276233 | 0.000198  |
| H | 9.771722  | -0.038994 | 0.000258  |
| H | 1.852534  | 2.063555  | 0.000065  |
| H | 0.170389  | -2.551313 | -0.000040 |
| H | 2.629884  | -2.127686 | 0.000026  |
| H | -7.618318 | -1.790580 | -0.000172 |
| H | -5.765779 | -3.436575 | -0.000159 |
| H | -3.717044 | 2.133109  | -0.000087 |

|   |           |           |           |
|---|-----------|-----------|-----------|
| H | -5.577583 | 3.742911  | -0.000102 |
| H | -7.931760 | 2.948109  | -0.000142 |
| H | -8.403471 | 0.520101  | -0.000167 |
| H | -2.416593 | -2.370171 | -0.000110 |
| H | -0.204092 | 2.967343  | 0.000028  |
| H | -1.466483 | 2.069803  | -0.874099 |
| H | -1.466534 | 2.069774  | 0.874052  |
| H | 6.480199  | 3.130956  | 0.000198  |
| H | 5.118633  | 2.383247  | -0.870354 |
| H | 5.118580  | 2.383226  | 0.870650  |

15g

|   |           |           |           |
|---|-----------|-----------|-----------|
| C | 7.018419  | 1.833625  | 0.000051  |
| C | 6.173960  | 0.703316  | 0.000051  |
| C | 4.765510  | 0.880181  | 0.000030  |
| C | 4.252586  | 2.192971  | 0.000013  |
| C | 5.099213  | 3.276394  | 0.000013  |
| C | 6.493956  | 3.102012  | 0.000031  |
| C | 6.702430  | -0.615473 | 0.000071  |
| C | 5.894459  | -1.713864 | 0.000071  |
| C | 4.488212  | -1.567666 | 0.000049  |
| C | 3.912664  | -0.278880 | 0.000029  |
| N | 2.558688  | -0.053946 | 0.000012  |
| N | 1.812941  | -1.079873 | 0.000022  |
| C | 0.433043  | -0.856209 | 0.000007  |
| C | -0.387244 | -1.999457 | 0.000008  |
| C | -1.763422 | -1.810390 | -0.000015 |
| C | -2.330248 | -0.537125 | -0.000036 |
| C | -1.499597 | 0.591927  | -0.000033 |
| C | -0.134385 | 0.428179  | -0.000013 |
| N | -3.738862 | -0.495747 | -0.000064 |
| N | -4.217496 | 0.660284  | -0.000060 |
| C | -5.615974 | 0.783042  | -0.000054 |
| C | -6.027617 | 2.122104  | -0.000050 |
| C | -7.365576 | 2.470853  | -0.000043 |
| C | -8.319942 | 1.461894  | -0.000038 |
| C | -7.921440 | 0.130520  | -0.000039 |
| C | -6.581481 | -0.253304 | -0.000046 |
| C | -6.256081 | -1.715566 | -0.000044 |
| C | 0.197998  | -3.380420 | 0.000031  |
| O | 3.748927  | -2.661535 | 0.000043  |
| H | -8.677667 | -0.648975 | -0.000033 |
| H | -5.246916 | 2.874544  | -0.000053 |
| H | -7.661026 | 3.514180  | -0.000042 |
| H | -9.377121 | 1.706608  | -0.000033 |
| H | -2.433370 | -2.664193 | -0.000017 |
| H | 0.531415  | 1.282224  | -0.000012 |
| H | -1.953477 | 1.574960  | -0.000049 |
| H | 7.781357  | -0.740074 | 0.000087  |
| H | 6.293585  | -2.721679 | 0.000086  |
| H | 3.178792  | 2.329952  | -0.000002 |
| H | 4.684683  | 4.279304  | -0.000002 |
| H | 7.149254  | 3.966247  | 0.000031  |
| H | 8.093514  | 1.680485  | 0.000066  |
| H | 2.794531  | -2.333054 | 0.000015  |
| H | -0.593403 | -4.131885 | 0.000030  |
| H | 0.826490  | -3.549280 | -0.879803 |
| H | 0.826468  | -3.549260 | 0.879885  |
| H | -7.179023 | -2.300932 | -0.000035 |
| H | -5.656544 | -1.991951 | -0.870492 |
| H | -5.656530 | -1.991948 | 0.870395  |

15h

|   |           |           |           |
|---|-----------|-----------|-----------|
| C | -6.926483 | 1.931729  | -0.000029 |
| C | -6.121991 | 0.772688  | -0.000069 |
| C | -4.708333 | 0.900077  | -0.000047 |
| C | -4.149941 | 2.194124  | 0.000019  |
| C | -4.958230 | 3.306529  | 0.000058  |
| C | -6.358114 | 3.181114  | 0.000033  |
| C | -6.696271 | -0.526925 | -0.000130 |
| C | -5.927336 | -1.652974 | -0.000170 |
| C | -4.516789 | -1.556247 | -0.000153 |
| C | -3.896434 | -0.288167 | -0.000086 |
| N | -2.535716 | -0.111095 | -0.000044 |
| N | -1.826614 | -1.163008 | -0.000022 |
| C | -0.439966 | -0.988953 | 0.000002  |
| C | 0.338743  | -2.161009 | 0.000031  |
| C | 1.720628  | -2.021367 | 0.000052  |
| C | 2.332598  | -0.769012 | 0.000044  |
| C | 1.542797  | 0.389689  | 0.000017  |
| C | 0.172899  | 0.274856  | -0.000004 |
| N | 3.738339  | -0.780968 | 0.000066  |
| N | 4.273749  | 0.348824  | 0.000054  |
| C | 5.681602  | 0.346135  | 0.000074  |
| C | 6.448836  | -0.824016 | 0.000111  |
| C | 7.828957  | -0.752985 | 0.000130  |
| C | 8.454176  | 0.491836  | 0.000111  |
| C | 7.693432  | 1.653052  | 0.000074  |
| C | 6.300566  | 1.609123  | 0.000055  |
| C | 5.495199  | 2.874517  | 0.000015  |
| C | -0.295957 | -3.519855 | 0.000038  |
| O | -3.816375 | -2.675066 | -0.000210 |
| H | 8.187852  | 2.619774  | 0.000060  |
| H | 5.929198  | -1.774492 | 0.000125  |
| H | 8.420757  | -1.662229 | 0.000159  |
| H | 9.537413  | 0.557020  | 0.000126  |
| H | 2.361633  | -2.896981 | 0.000074  |
| H | -0.462216 | 1.151947  | -0.000027 |
| H | 2.030603  | 1.356438  | 0.000011  |
| H | -7.778894 | -0.613795 | -0.000147 |
| H | -6.361648 | -2.646128 | -0.000221 |
| H | -3.072039 | 2.293858  | 0.000039  |
| H | -4.508801 | 4.294295  | 0.000108  |
| H | -6.982823 | 4.067699  | 0.000064  |
| H | -8.006254 | 1.816189  | -0.000048 |
| H | -2.850830 | -2.380070 | -0.000219 |
| H | 0.467739  | -4.299412 | 0.000060  |
| H | -0.930111 | -3.665826 | 0.879895  |
| H | -0.930085 | -3.665848 | -0.879834 |
| H | 6.153178  | 3.746090  | 0.000006  |
| H | 4.845263  | 2.930973  | -0.876862 |
| H | 4.845236  | 2.931012  | 0.876870  |

15i

|   |          |           |           |
|---|----------|-----------|-----------|
| C | 7.379795 | 1.213829  | 0.000024  |
| C | 6.356568 | 0.254539  | -0.000003 |
| C | 5.007211 | 0.669931  | -0.000004 |
| C | 4.726290 | 2.042326  | 0.000023  |
| C | 5.748429 | 2.972231  | 0.000050  |
| C | 7.084267 | 2.561929  | 0.000050  |
| C | 6.662297 | -1.151673 | -0.000029 |
| C | 5.707833 | -2.106848 | -0.000057 |

|   |           |           |           |
|---|-----------|-----------|-----------|
| C | 4.300858  | -1.768051 | -0.000062 |
| C | 3.956099  | -0.340343 | -0.000032 |
| N | 2.709229  | 0.094876  | -0.000024 |
| N | 1.738004  | -0.765957 | 0.000002  |
| C | 0.407486  | -0.367361 | 0.000000  |
| C | -0.577000 | -1.380125 | 0.000045  |
| C | -1.905234 | -0.995306 | 0.000044  |
| C | -2.274905 | 0.354301  | 0.000000  |
| C | -1.282858 | 1.336220  | -0.000043 |
| C | 0.051400  | 0.982362  | -0.000044 |
| N | -3.599038 | 0.820969  | 0.000000  |
| N | -4.477015 | -0.069340 | 0.000021  |
| C | -5.805228 | 0.399527  | 0.000008  |
| C | -6.142335 | 1.757432  | -0.000012 |
| C | -7.468531 | 2.146965  | -0.000025 |
| C | -8.470864 | 1.179795  | -0.000018 |
| C | -8.136884 | -0.167690 | 0.000003  |
| C | -6.807837 | -0.586624 | 0.000016  |
| C | -6.466469 | -2.047356 | 0.000037  |
| C | -0.189711 | -2.830185 | 0.000094  |
| O | 3.423858  | -2.653038 | -0.000098 |
| H | -8.922965 | -0.916779 | 0.000009  |
| H | -5.337740 | 2.482763  | -0.000017 |
| H | -7.725830 | 3.200958  | -0.000041 |
| H | -9.514562 | 1.477065  | -0.000028 |
| H | -2.689896 | -1.743069 | 0.000078  |
| H | 0.832881  | 1.730907  | -0.000077 |
| H | -1.588117 | 2.376553  | -0.000075 |
| H | 7.711099  | -1.437687 | -0.000029 |
| H | 5.946945  | -3.164330 | -0.000081 |
| H | 3.691695  | 2.362670  | 0.000022  |
| H | 5.508972  | 4.030564  | 0.000071  |
| H | 7.881665  | 3.296933  | 0.000071  |
| H | 8.412497  | 0.877873  | 0.000025  |
| H | 2.021239  | -1.763505 | 0.000038  |
| H | -1.078576 | -3.462013 | 0.000127  |
| H | 0.408242  | -3.091871 | -0.879949 |
| H | 0.408262  | -3.091806 | 0.880142  |
| H | -7.375555 | -2.652549 | 0.000045  |
| H | -5.871717 | -2.315587 | -0.876876 |
| H | -5.871719 | -2.315562 | 0.876960  |

15j

|   |           |           |           |
|---|-----------|-----------|-----------|
| C | -7.315837 | 1.308437  | -0.000266 |
| C | -6.323449 | 0.317218  | -0.000151 |
| C | -4.961447 | 0.689700  | -0.000149 |
| C | -4.637582 | 2.052679  | -0.000263 |
| C | -5.629880 | 3.014336  | -0.000375 |
| C | -6.978128 | 2.646474  | -0.000377 |
| C | -6.673699 | -1.078381 | -0.000035 |
| C | -5.749766 | -2.063084 | 0.000078  |
| C | -4.332792 | -1.768827 | 0.000091  |
| C | -3.942970 | -0.353261 | -0.000027 |
| N | -2.682203 | 0.041736  | -0.000034 |
| N | -1.740361 | -0.850524 | 0.000049  |
| C | -0.396623 | -0.497693 | 0.000047  |
| C | 0.552496  | -1.543051 | 0.000147  |
| C | 1.893320  | -1.203277 | 0.000146  |
| C | 2.309014  | 0.132133  | 0.000051  |
| C | 1.351314  | 1.147293  | -0.000048 |
| C | 0.005526  | 0.838852  | -0.000050 |

|   |           |           |           |
|---|-----------|-----------|-----------|
| N | 3.653080  | 0.550373  | 0.000046  |
| N | 4.485811  | -0.383601 | 0.000134  |
| C | 5.846946  | -0.037746 | 0.000109  |
| C | 6.678705  | -1.164831 | 0.000228  |
| C | 8.056797  | -1.051913 | 0.000228  |
| C | 8.624499  | 0.215553  | 0.000107  |
| C | 7.807735  | 1.339851  | -0.000012 |
| C | 6.416135  | 1.259098  | -0.000015 |
| C | 5.625941  | 2.532018  | -0.000149 |
| C | 0.116682  | -2.979323 | 0.000251  |
| O | -3.484605 | -2.681776 | 0.000195  |
| H | 8.263360  | 2.325797  | -0.000107 |
| H | 6.191150  | -2.133375 | 0.000321  |
| H | 8.680178  | -1.939223 | 0.000322  |
| H | 9.703114  | 0.334166  | 0.000104  |
| H | 2.653082  | -1.976226 | 0.000222  |
| H | -0.749989 | 1.613676  | -0.000127 |
| H | 1.689027  | 2.177638  | -0.000123 |
| H | -7.731039 | -1.330985 | -0.000041 |
| H | -6.021988 | -3.112538 | 0.000164  |
| H | -3.593368 | 2.340191  | -0.000260 |
| H | -5.357074 | 4.064591  | -0.000462 |
| H | -7.751900 | 3.406310  | -0.000465 |
| H | -8.358604 | 1.005191  | -0.000266 |
| H | -2.057084 | -1.838272 | 0.000118  |
| H | 0.984025  | -3.640318 | 0.000317  |
| H | -0.489760 | -3.220660 | 0.880288  |
| H | -0.489731 | -3.220797 | -0.879768 |
| H | 6.304038  | 3.389211  | -0.000230 |
| H | 4.968749  | 2.595116  | -0.870562 |
| H | 4.968736  | 2.595291  | 0.870241  |

15k

|   |           |           |           |
|---|-----------|-----------|-----------|
| C | 7.251717  | 1.282105  | 0.000214  |
| C | 6.289993  | 0.261178  | 0.000157  |
| C | 4.916589  | 0.591541  | 0.000139  |
| C | 4.552449  | 1.944971  | 0.000176  |
| C | 5.515495  | 2.936117  | 0.000231  |
| C | 6.874347  | 2.609414  | 0.000251  |
| C | 6.682735  | -1.122613 | 0.000117  |
| C | 5.788617  | -2.134264 | 0.000062  |
| C | 4.363079  | -1.883010 | 0.000041  |
| C | 3.931129  | -0.481265 | 0.000080  |
| N | 2.656988  | -0.120430 | 0.000064  |
| N | 1.745822  | -1.041841 | -0.000030 |
| C | 0.376822  | -0.802540 | -0.000044 |
| C | -0.234049 | 0.474207  | 0.000056  |
| C | -1.620127 | 0.512765  | 0.000024  |
| C | -2.408887 | -0.640638 | -0.000100 |
| C | -1.786343 | -1.887574 | -0.000198 |
| C | -0.410245 | -1.962452 | -0.000169 |
| N | -3.816504 | -0.649860 | -0.000135 |
| N | -4.342747 | 0.485295  | -0.000031 |
| C | -5.745673 | 0.548116  | -0.000080 |
| C | -6.215456 | 1.867809  | 0.000065  |
| C | -7.567302 | 2.158540  | 0.000047  |
| C | -8.477348 | 1.109561  | -0.000120 |
| C | -8.021095 | -0.203054 | -0.000266 |
| C | -6.665659 | -0.528752 | -0.000251 |
| C | -6.278084 | -1.975831 | -0.000417 |
| C | 0.522789  | 1.769943  | 0.000193  |

|   |           |           |           |
|---|-----------|-----------|-----------|
| O | 3.544534  | -2.823159 | -0.000002 |
| H | -8.742792 | -1.014710 | -0.000396 |
| H | -5.468478 | 2.653796  | 0.000193  |
| H | -7.907268 | 3.188244  | 0.000162  |
| H | -9.544155 | 1.308039  | -0.000139 |
| H | -2.127753 | 1.470551  | 0.000099  |
| H | 0.083484  | -2.929343 | -0.000244 |
| H | -2.399123 | -2.781654 | -0.000296 |
| H | 7.747262  | -1.342933 | 0.000133  |
| H | 6.091715  | -3.175254 | 0.000033  |
| H | 3.500541  | 2.202453  | 0.000161  |
| H | 5.210957  | 3.977671  | 0.000260  |
| H | 7.624814  | 3.392265  | 0.000294  |
| H | 8.303131  | 1.010275  | 0.000228  |
| H | 2.103790  | -2.018511 | -0.000110 |
| H | -0.182398 | 2.603451  | 0.000252  |
| H | 1.170941  | 1.858051  | 0.875815  |
| H | 1.170986  | 1.858211  | -0.875380 |
| H | -7.175150 | -2.600133 | -0.000534 |
| H | -5.667285 | -2.226385 | -0.870868 |
| H | -5.667358 | -2.226605 | 0.870022  |

151

|   |           |           |           |
|---|-----------|-----------|-----------|
| C | 7.187492  | 1.378826  | 0.000188  |
| C | 6.260641  | 0.326260  | 0.000062  |
| C | 4.876878  | 0.610344  | 0.000073  |
| C | 4.467363  | 1.950673  | 0.000211  |
| C | 5.396614  | 2.973654  | 0.000334  |
| C | 6.765634  | 2.692687  | 0.000323  |
| C | 6.700179  | -1.043432 | -0.000078 |
| C | 5.841091  | -2.084851 | -0.000203 |
| C | 4.407950  | -1.882053 | -0.000203 |
| C | 3.928158  | -0.495394 | -0.000058 |
| N | 2.642719  | -0.178281 | -0.000033 |
| N | 1.763157  | -1.130499 | -0.000086 |
| C | 0.387188  | -0.938391 | -0.000076 |
| C | -0.267316 | 0.317042  | -0.000025 |
| C | -1.653590 | 0.307934  | -0.000018 |
| C | -2.402240 | -0.872606 | -0.000058 |
| C | -1.736980 | -2.097488 | -0.000108 |
| C | -0.359335 | -2.124914 | -0.000117 |
| N | -3.805061 | -0.933107 | -0.000048 |
| N | -4.385582 | 0.174251  | 0.000001  |
| C | -5.792695 | 0.112638  | 0.000007  |
| C | -6.509811 | -1.088787 | -0.000031 |
| C | -7.891867 | -1.076552 | -0.000021 |
| C | -8.569860 | 0.140134  | 0.000027  |
| C | -7.858821 | 1.332426  | 0.000065  |
| C | -6.465259 | 1.347712  | 0.000057  |
| C | -5.714553 | 2.646323  | 0.000099  |
| C | 0.445292  | 1.637650  | 0.000022  |
| O | 3.621889  | -2.849251 | -0.000326 |
| H | -8.393780 | 2.277365  | 0.000104  |
| H | -5.950635 | -2.016534 | -0.000068 |
| H | -8.444067 | -2.010414 | -0.000050 |
| H | -9.654873 | 0.159120  | 0.000036  |
| H | -2.192936 | 1.248297  | 0.000021  |
| H | 0.167568  | -3.074123 | -0.000155 |
| H | -2.320751 | -3.010665 | -0.000139 |
| H | 7.771598  | -1.227224 | -0.000083 |
| H | 6.179215  | -3.114973 | -0.000310 |



|   |           |           |           |
|---|-----------|-----------|-----------|
| H | 3.407369  | 2.172363  | 0.000220  |
| H | 5.057377  | 4.004417  | 0.000440  |
| H | 7.489371  | 3.500319  | 0.000421  |
| H | 8.247455  | 1.142571  | 0.000178  |
| H | 2.153709  | -2.094484 | -0.000119 |
| H | -0.287313 | 2.447213  | 0.000054  |
| H | 1.090171  | 1.747492  | 0.875588  |
| H | 1.090166  | 1.747556  | -0.875541 |
| H | -6.408914 | 3.489217  | 0.000134  |
| H | -5.067697 | 2.730435  | 0.877089  |
| H | -5.067707 | 2.730498  | -0.876891 |

15m

|   |           |           |           |
|---|-----------|-----------|-----------|
| C | -6.859204 | 0.871773  | 0.000216  |
| C | -5.898783 | -0.155777 | 0.000125  |
| C | -6.291877 | -1.498476 | 0.000073  |
| C | -7.633041 | -1.832463 | 0.000113  |
| C | -8.594101 | -0.824211 | 0.000205  |
| C | -8.204588 | 0.508256  | 0.000255  |
| N | -4.552356 | 0.256566  | 0.000090  |
| N | -3.711845 | -0.669270 | 0.000054  |
| C | -2.371726 | -0.250831 | 0.000027  |
| C | -1.418356 | -1.266949 | 0.000018  |
| C | -0.048367 | -1.028230 | -0.000005 |
| C | 0.358677  | 0.321413  | -0.000022 |
| C | -0.599378 | 1.352000  | -0.000015 |
| C | -1.946475 | 1.081779  | 0.000009  |
| N | 1.674346  | 0.767839  | -0.000047 |
| N | 2.713578  | -0.007132 | -0.000059 |
| C | 3.919887  | 0.537611  | -0.000069 |
| C | 5.052727  | -0.378529 | -0.000131 |
| C | 6.362197  | 0.150978  | -0.000155 |
| C | 6.546620  | 1.577729  | -0.000117 |
| C | 5.513457  | 2.446837  | -0.000057 |
| C | 4.140519  | 1.988334  | -0.000024 |
| C | 4.891855  | -1.770782 | -0.000168 |
| C | 5.990605  | -2.609058 | -0.000227 |
| C | 7.286248  | -2.085274 | -0.000251 |
| C | 7.464000  | -0.716767 | -0.000215 |
| O | 3.191807  | 2.796403  | 0.000041  |
| C | 0.889779  | -2.198830 | -0.000008 |
| C | -6.456485 | 2.316690  | 0.000273  |
| H | -8.958986 | 1.289204  | 0.000327  |
| H | -5.518370 | -2.256823 | 0.000002  |
| H | -7.934192 | -2.874748 | 0.000072  |
| H | -9.649283 | -1.077680 | 0.000237  |
| H | -1.781335 | -2.289764 | 0.000032  |
| H | -0.252221 | 2.381202  | -0.000030 |
| H | -2.682840 | 1.875239  | 0.000015  |
| H | 7.567154  | 1.952201  | -0.000137 |
| H | 5.660027  | 3.521066  | -0.000025 |
| H | 3.889419  | -2.180322 | -0.000149 |
| H | 5.843311  | -3.684157 | -0.000255 |
| H | 8.143983  | -2.748902 | -0.000298 |
| H | 8.463914  | -0.293061 | -0.000233 |
| H | 1.880545  | 1.786886  | -0.000073 |
| H | 0.315733  | -3.127682 | 0.000008  |
| H | 1.543971  | -2.191005 | -0.875589 |
| H | 1.543995  | -2.190990 | 0.875554  |
| H | -7.338904 | 2.960048  | 0.000338  |
| H | -5.850754 | 2.559299  | 0.877096  |

|     |           |           |           |
|-----|-----------|-----------|-----------|
| H   | -5.850820 | 2.559386  | -0.876572 |
| 15n |           |           |           |
| C   | 6.539544  | 0.991613  | 0.000178  |
| C   | 5.922299  | -0.283076 | 0.000146  |
| C   | 6.710950  | -1.440819 | 0.000161  |
| C   | 8.092318  | -1.379692 | 0.000208  |
| C   | 8.706988  | -0.134387 | 0.000239  |
| C   | 7.933168  | 1.019927  | 0.000224  |
| N   | 4.549249  | -0.577289 | 0.000097  |
| N   | 3.752514  | 0.387655  | 0.000091  |
| C   | 2.395035  | 0.015809  | 0.000048  |
| C   | 1.476547  | 1.063247  | 0.000048  |
| C   | 0.099178  | 0.870645  | 0.000009  |
| C   | -0.353464 | -0.464366 | -0.000032 |
| C   | 0.569189  | -1.526042 | -0.000034 |
| C   | 1.924970  | -1.301059 | 0.000005  |
| N   | -1.684280 | -0.865475 | -0.000072 |
| N   | -2.695345 | -0.054698 | -0.000078 |
| C   | -3.920555 | -0.555896 | -0.000109 |
| C   | -5.019205 | 0.400684  | -0.000119 |
| C   | -6.347084 | -0.080534 | -0.000147 |
| C   | -6.582933 | -1.499753 | -0.000164 |
| C   | -5.581838 | -2.405730 | -0.000156 |
| C   | -4.193053 | -1.997366 | -0.000130 |
| C   | -4.807649 | 1.786243  | -0.000103 |
| C   | -5.874933 | 2.664076  | -0.000112 |
| C   | -7.188865 | 2.188056  | -0.000139 |
| C   | -7.416517 | 0.826930  | -0.000156 |
| O   | -3.273966 | -2.839040 | -0.000123 |
| C   | -0.798560 | 2.072393  | 0.000015  |
| C   | 5.798166  | 2.293493  | 0.000164  |
| H   | 8.426005  | 1.987802  | 0.000248  |
| H   | 6.187121  | -2.390217 | 0.000134  |
| H   | 8.681916  | -2.289760 | 0.000219  |
| H   | 9.789288  | -0.056270 | 0.000276  |
| H   | 1.870820  | 2.074457  | 0.000080  |
| H   | 0.188249  | -2.543197 | -0.000067 |
| H   | 2.635399  | -2.117741 | 0.000004  |
| H   | -7.616287 | -1.837335 | -0.000184 |
| H   | -5.767381 | -3.473934 | -0.000170 |
| H   | -3.790967 | 2.159041  | -0.000084 |
| H   | -5.688446 | 3.733081  | -0.000099 |
| H   | -8.021800 | 2.882553  | -0.000146 |
| H   | -8.431219 | 0.439877  | -0.000177 |
| H   | -1.925845 | -1.876697 | -0.000096 |
| H   | -0.193279 | 2.981316  | 0.000052  |
| H   | -1.452669 | 2.087040  | -0.875525 |
| H   | -1.452715 | 2.086997  | 0.875519  |
| H   | 6.508275  | 3.124299  | 0.000194  |
| H   | 5.144089  | 2.381650  | -0.870419 |
| H   | 5.144032  | 2.381636  | 0.870705  |
| 15o |           |           |           |
| C   | -6.598359 | -0.253972 | -0.000052 |
| C   | -5.635633 | 0.784750  | -0.000050 |
| C   | -6.051975 | 2.122171  | -0.000042 |
| C   | -7.391093 | 2.466980  | -0.000037 |
| C   | -8.342759 | 1.455562  | -0.000041 |
| C   | -7.939641 | 0.125667  | -0.000049 |
| N   | -4.236215 | 0.666205  | -0.000054 |

|   |           |           |           |
|---|-----------|-----------|-----------|
| N | -3.754542 | -0.488674 | -0.000057 |
| C | -2.347573 | -0.529870 | -0.000037 |
| C | -1.776707 | -1.802156 | -0.000039 |
| C | -0.402395 | -1.992607 | -0.000021 |
| C | 0.412253  | -0.846241 | -0.000002 |
| C | -0.148330 | 0.437609  | 0.000000  |
| C | -1.515521 | 0.596318  | -0.000017 |
| N | 1.789013  | -1.032947 | 0.000015  |
| N | 2.615484  | -0.032933 | 0.000024  |
| C | 3.915008  | -0.271539 | 0.000050  |
| C | 4.798524  | 0.887971  | 0.000032  |
| C | 6.195767  | 0.683876  | 0.000053  |
| C | 6.713424  | -0.658597 | 0.000095  |
| C | 5.916402  | -1.748593 | 0.000116  |
| C | 4.474341  | -1.629037 | 0.000095  |
| C | 4.310855  | 2.201339  | -0.000009 |
| C | 5.178748  | 3.276552  | -0.000028 |
| C | 6.561810  | 3.075321  | -0.000006 |
| C | 7.060149  | 1.788492  | 0.000034  |
| O | 3.743439  | -2.638512 | 0.000123  |
| C | 0.192640  | -3.369908 | -0.000024 |
| C | -6.268916 | -1.715582 | -0.000059 |
| H | -8.693176 | -0.656518 | -0.000051 |
| H | -5.273725 | 2.877195  | -0.000039 |
| H | -7.689363 | 3.509555  | -0.000031 |
| H | -9.400680 | 1.697028  | -0.000038 |
| H | -2.443762 | -2.658263 | -0.000054 |
| H | 0.515063  | 1.293155  | 0.000016  |
| H | -1.968101 | 1.579937  | -0.000015 |
| H | 7.793672  | -0.780255 | 0.000112  |
| H | 6.314343  | -2.757091 | 0.000151  |
| H | 3.239368  | 2.359125  | -0.000026 |
| H | 4.780391  | 4.285870  | -0.000059 |
| H | 7.237299  | 3.923762  | -0.000021 |
| H | 8.132107  | 1.614594  | 0.000051  |
| H | 2.223308  | -1.975009 | 0.000011  |
| H | -0.593527 | -4.125909 | -0.000040 |
| H | 0.822395  | -3.541531 | -0.880007 |
| H | 0.822373  | -3.541545 | 0.879971  |
| H | -7.190293 | -2.303528 | -0.000058 |
| H | -5.668746 | -1.990527 | -0.870539 |
| H | -5.668739 | -1.990534 | 0.870413  |

15p

|   |           |           |           |
|---|-----------|-----------|-----------|
| C | 6.321297  | 1.609792  | 0.000092  |
| C | 5.699059  | 0.348593  | 0.000063  |
| C | 6.464190  | -0.822713 | 0.000072  |
| C | 7.844693  | -0.754675 | 0.000109  |
| C | 8.473023  | 0.488393  | 0.000138  |
| C | 7.714286  | 1.650944  | 0.000129  |
| N | 4.290649  | 0.354507  | 0.000022  |
| N | 3.753349  | -0.774609 | 0.000010  |
| C | 2.349342  | -0.763872 | -0.000002 |
| C | 1.734131  | -2.015599 | -0.000017 |
| C | 0.354202  | -2.157547 | -0.000030 |
| C | -0.419544 | -0.983059 | -0.000028 |
| C | 0.185665  | 0.280873  | -0.000013 |
| C | 1.557205  | 0.391462  | -0.000001 |
| N | -1.801521 | -1.120604 | -0.000038 |
| N | -2.591577 | -0.091065 | -0.000036 |
| C | -3.898597 | -0.282266 | -0.000042 |

|   |           |           |           |
|---|-----------|-----------|-----------|
| C | -4.739509 | 0.908603  | -0.000044 |
| C | -6.143100 | 0.755678  | -0.000049 |
| C | -6.709384 | -0.567191 | -0.000055 |
| C | -5.952737 | -1.685580 | -0.000056 |
| C | -4.507182 | -1.618783 | -0.000047 |
| C | -4.204186 | 2.203223  | -0.000041 |
| C | -5.032174 | 3.309520  | -0.000042 |
| C | -6.421530 | 3.158961  | -0.000045 |
| C | -6.966551 | 1.891080  | -0.000048 |
| O | -3.813396 | -2.653886 | -0.000048 |
| C | -0.289704 | -3.512648 | -0.000046 |
| C | 5.518599  | 2.877029  | 0.000083  |
| H | 8.210459  | 2.616832  | 0.000152  |
| H | 5.942840  | -1.772263 | 0.000048  |
| H | 8.434254  | -1.665440 | 0.000115  |
| H | 9.556394  | 0.551261  | 0.000167  |
| H | 2.372816  | -2.892953 | -0.000018 |
| H | -0.447503 | 1.158996  | -0.000013 |
| H | 2.042997  | 1.359191  | 0.000010  |
| H | -7.793343 | -0.649463 | -0.000060 |
| H | -6.387309 | -2.678836 | -0.000062 |
| H | -3.127678 | 2.321989  | -0.000038 |
| H | -4.597150 | 4.303578  | -0.000039 |
| H | -7.065656 | 4.031447  | -0.000045 |
| H | -8.044139 | 1.756488  | -0.000052 |
| H | -2.269402 | -2.046434 | -0.000048 |
| H | 0.468846  | -4.296314 | -0.000047 |
| H | -0.925135 | -3.661481 | 0.879998  |
| H | -0.925121 | -3.661466 | -0.880103 |
| H | 6.178384  | 3.747308  | 0.000109  |
| H | 4.868703  | 2.934887  | -0.876781 |
| H | 4.868656  | 2.934871  | 0.876913  |

1a

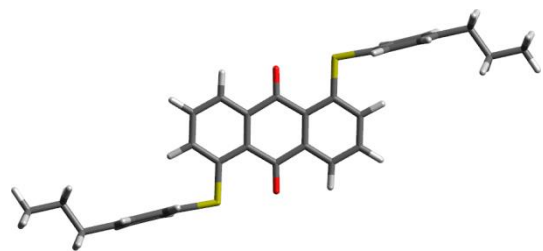

1b

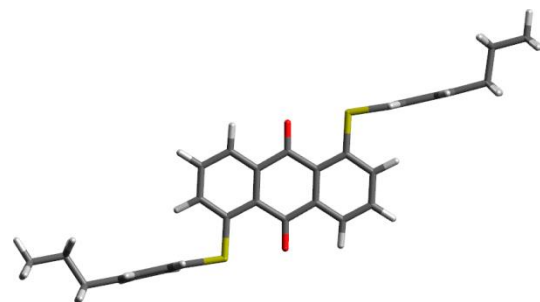

1c

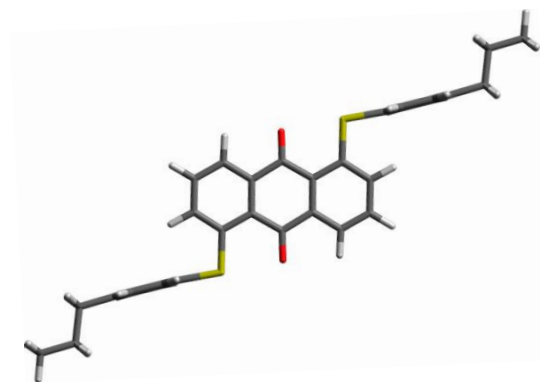

2a

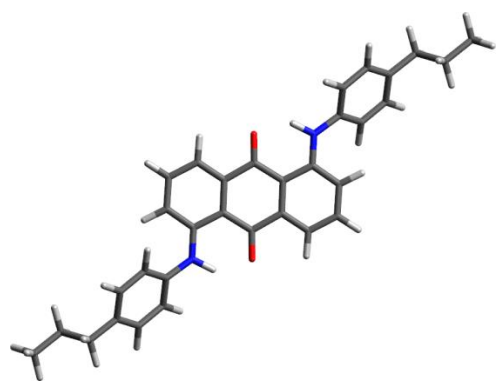

2b

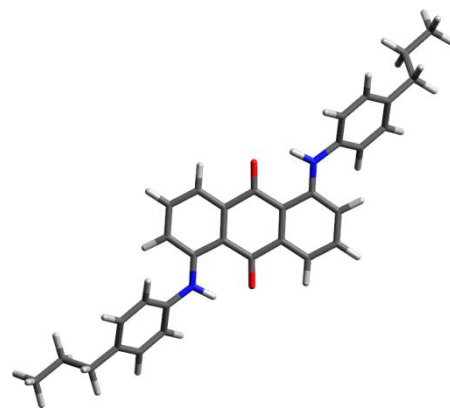

2c

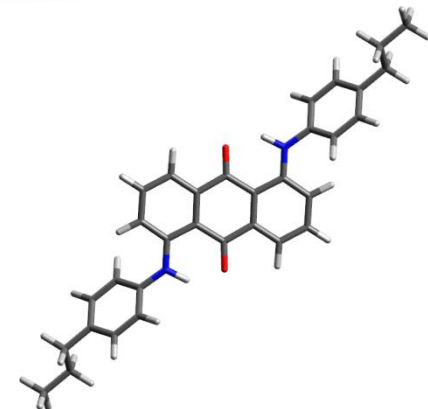

2d

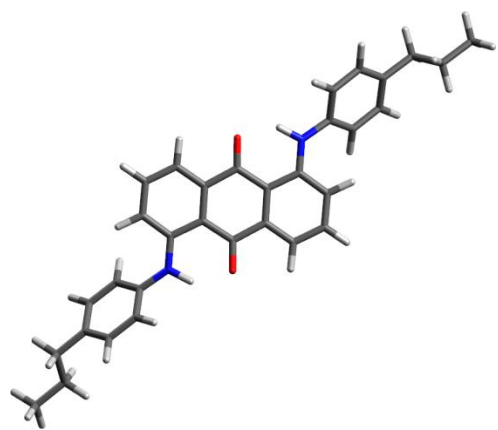

2e

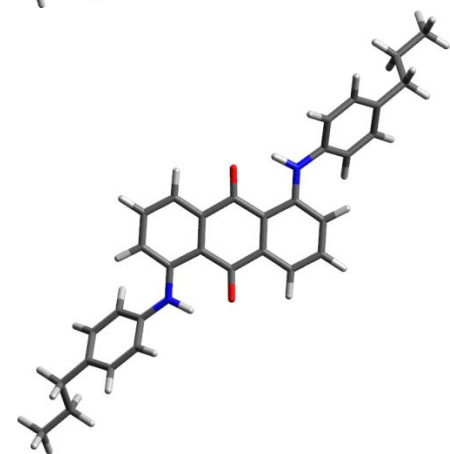

2f

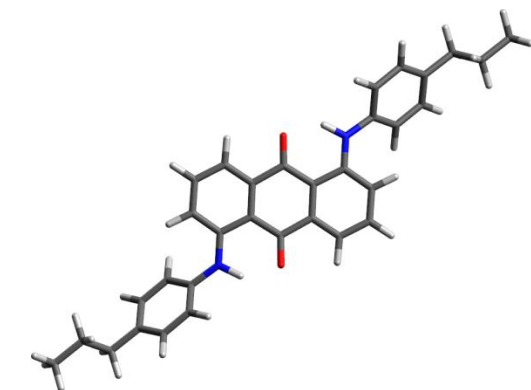

3a

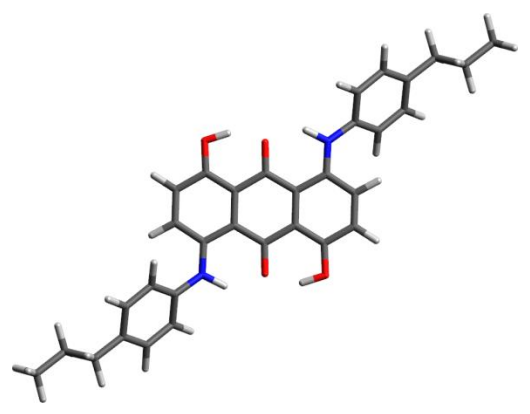

3b

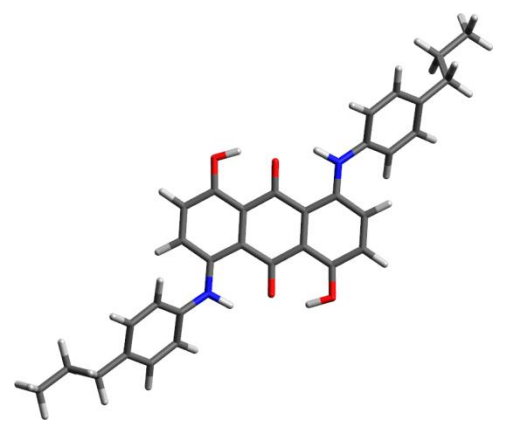

3c

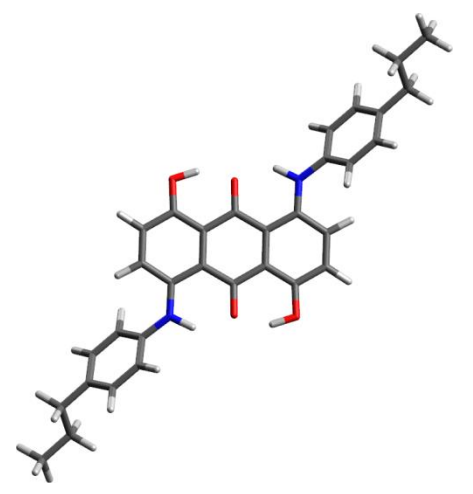

3d

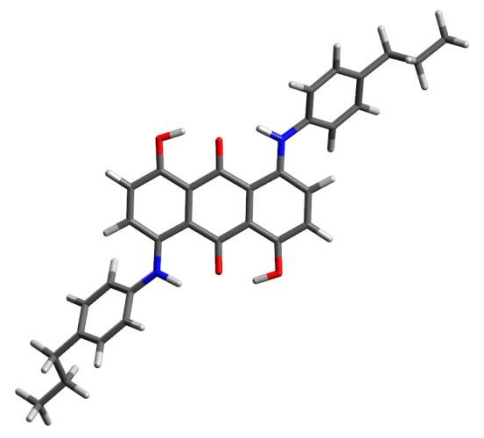

3e

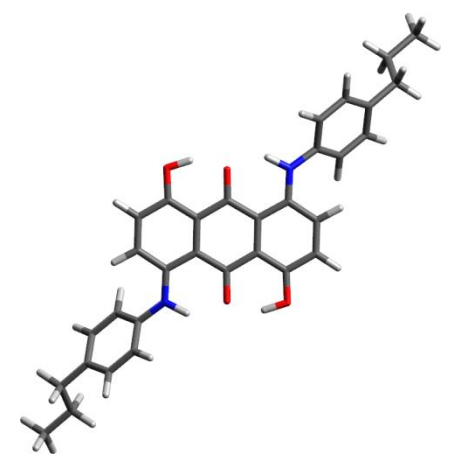

3f

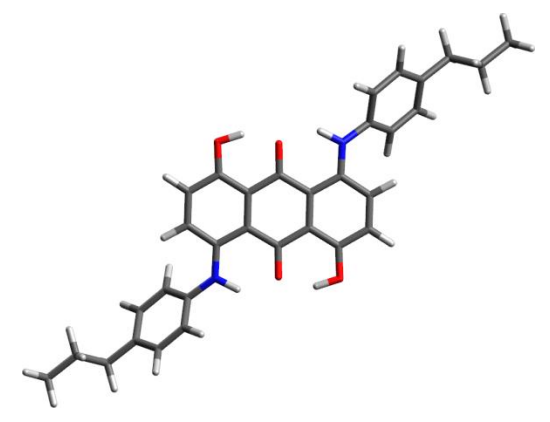

4a

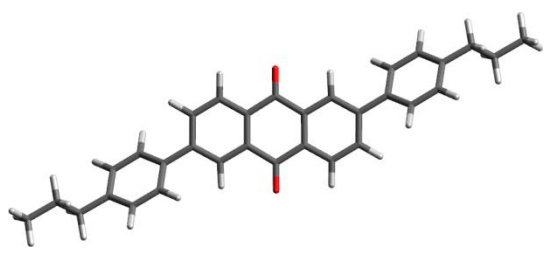

4b

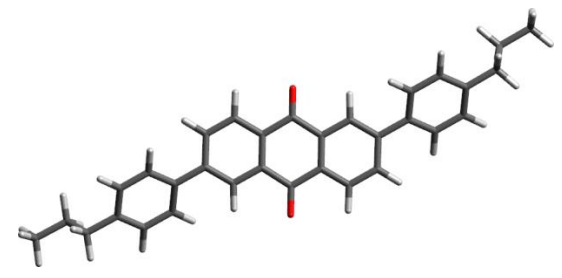

4c

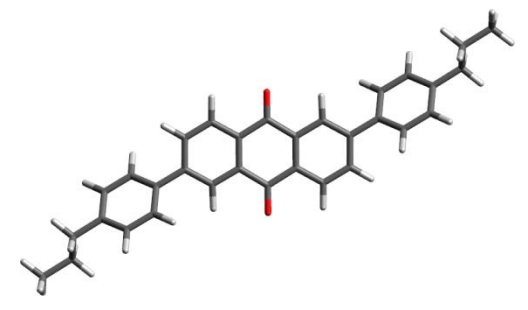

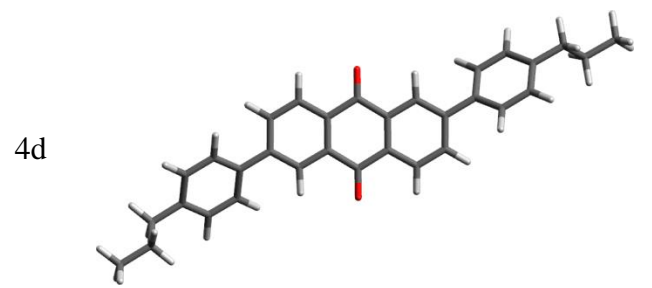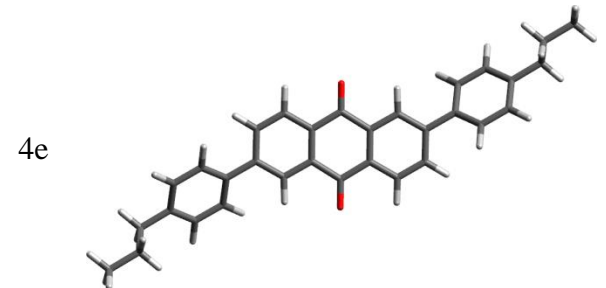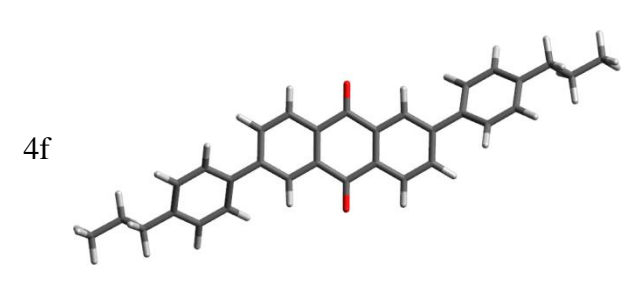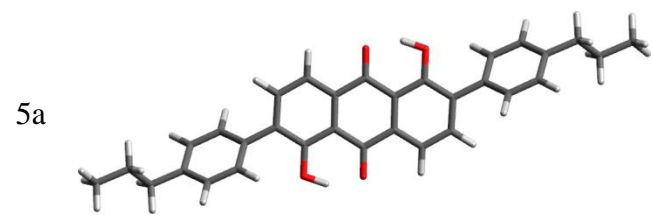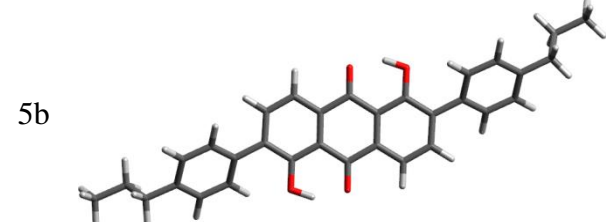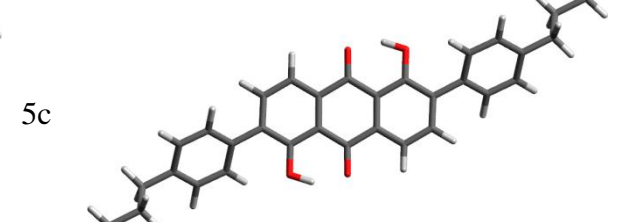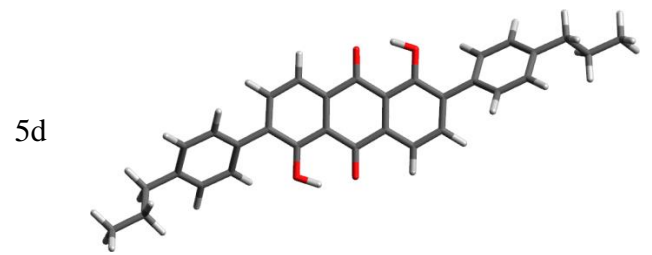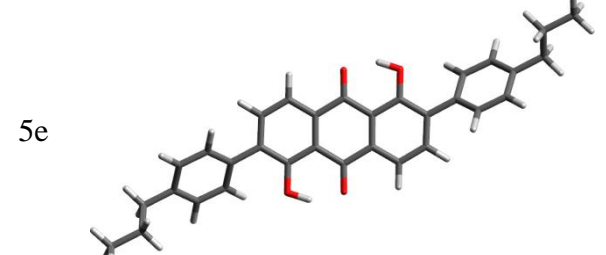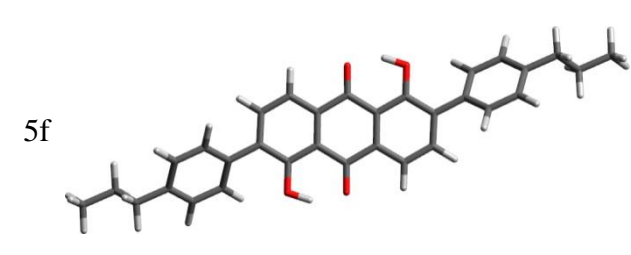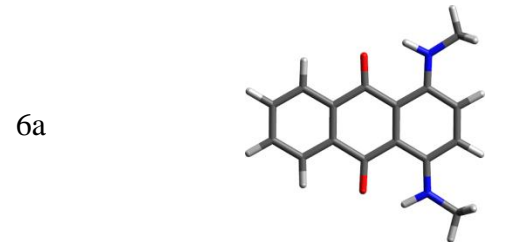

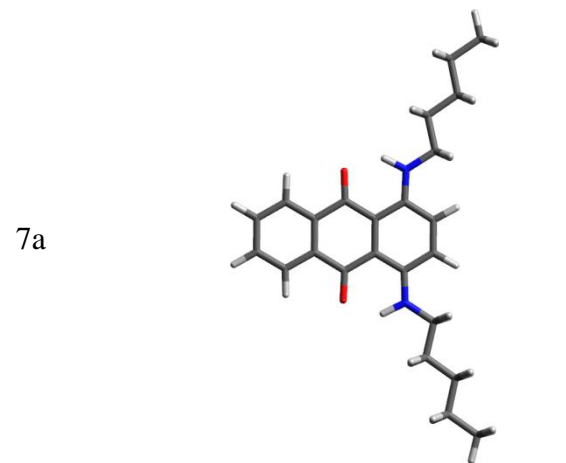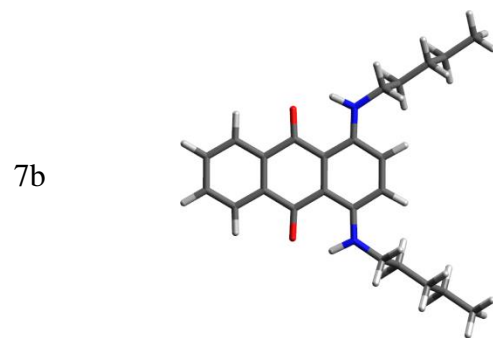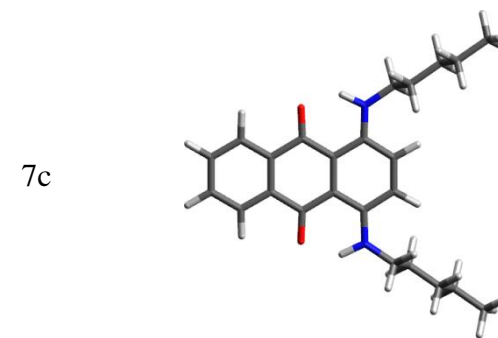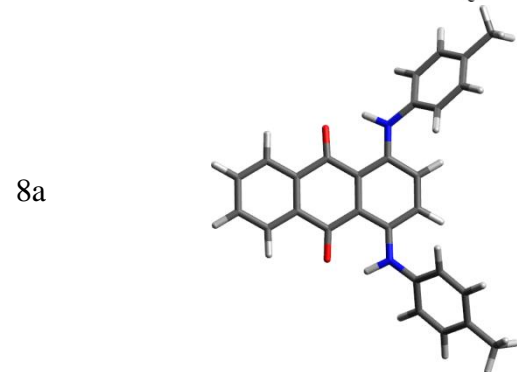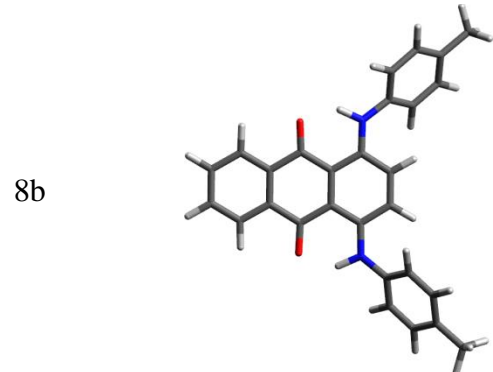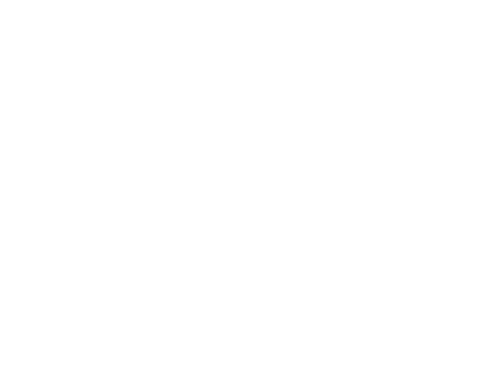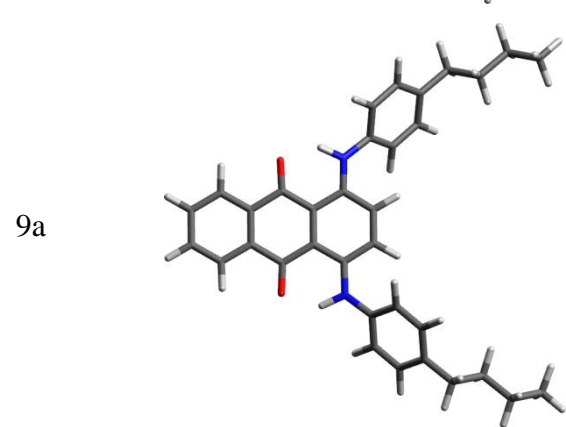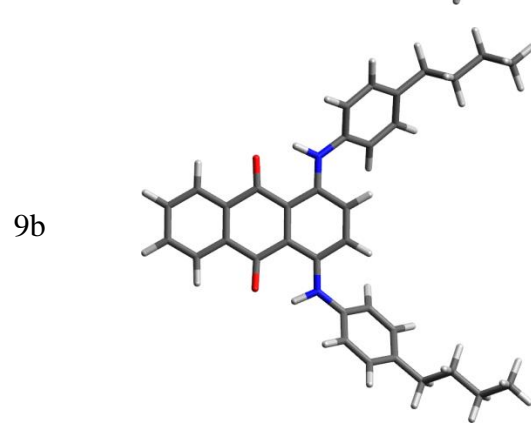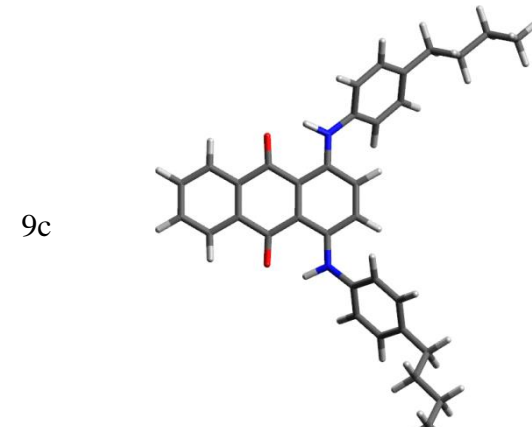



9d

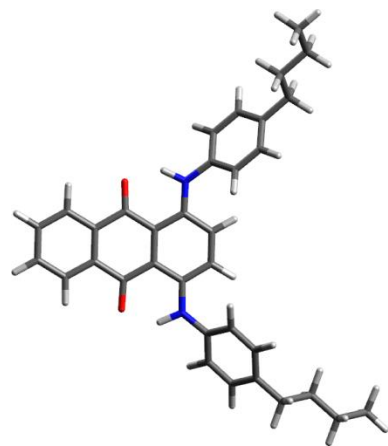

9e

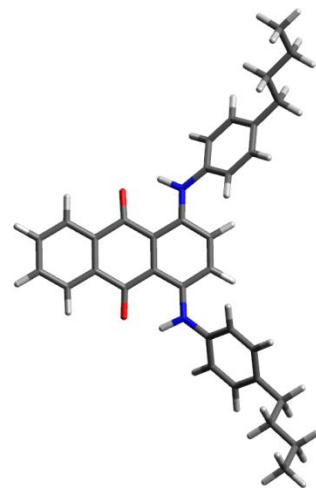

9f

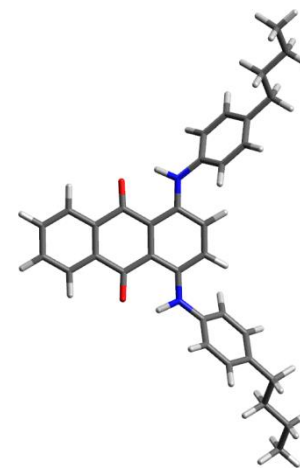

10a

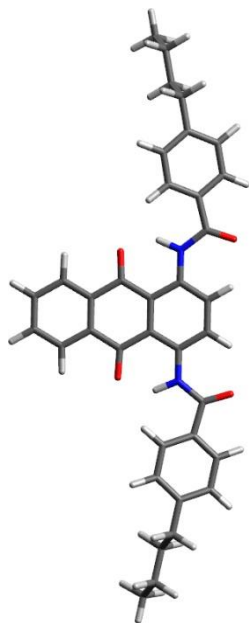

10b

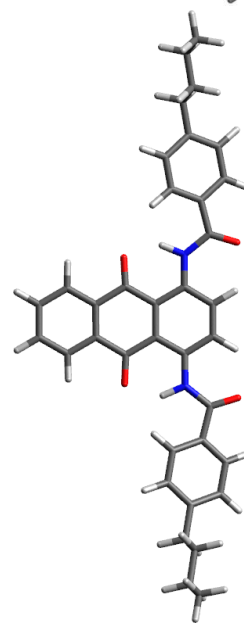

10c

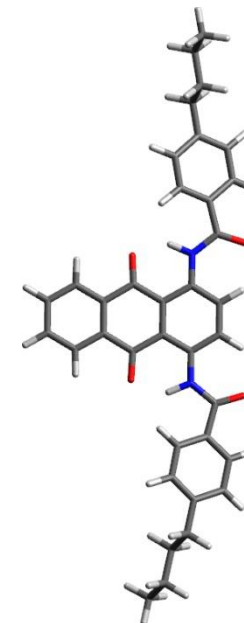

11a

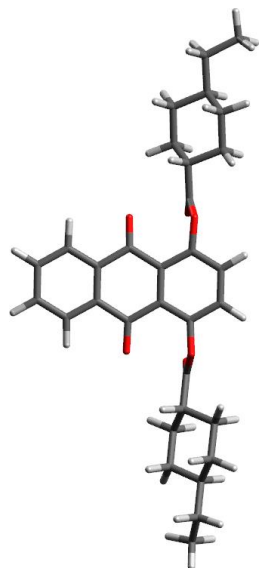

11b

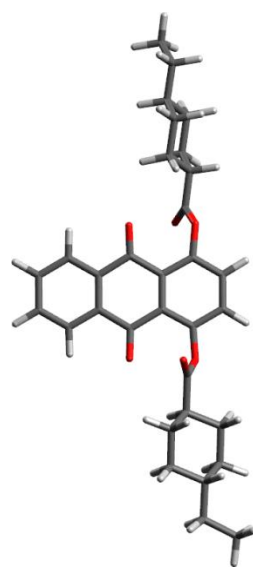

12a

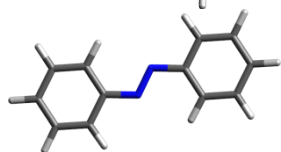

13a

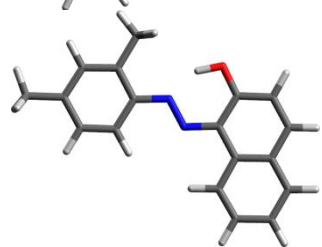

13d

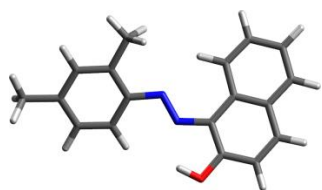

13b

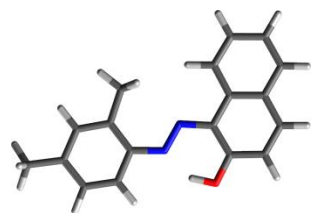

13e

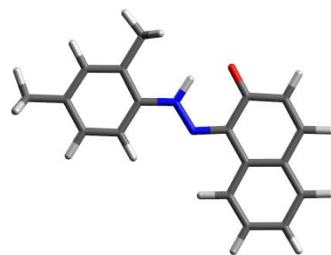

13c

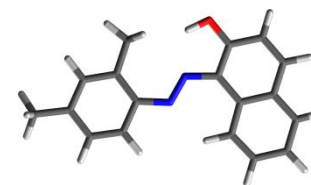

13f

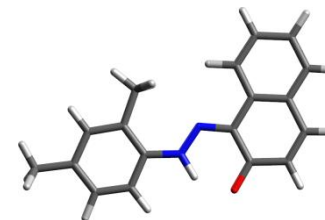

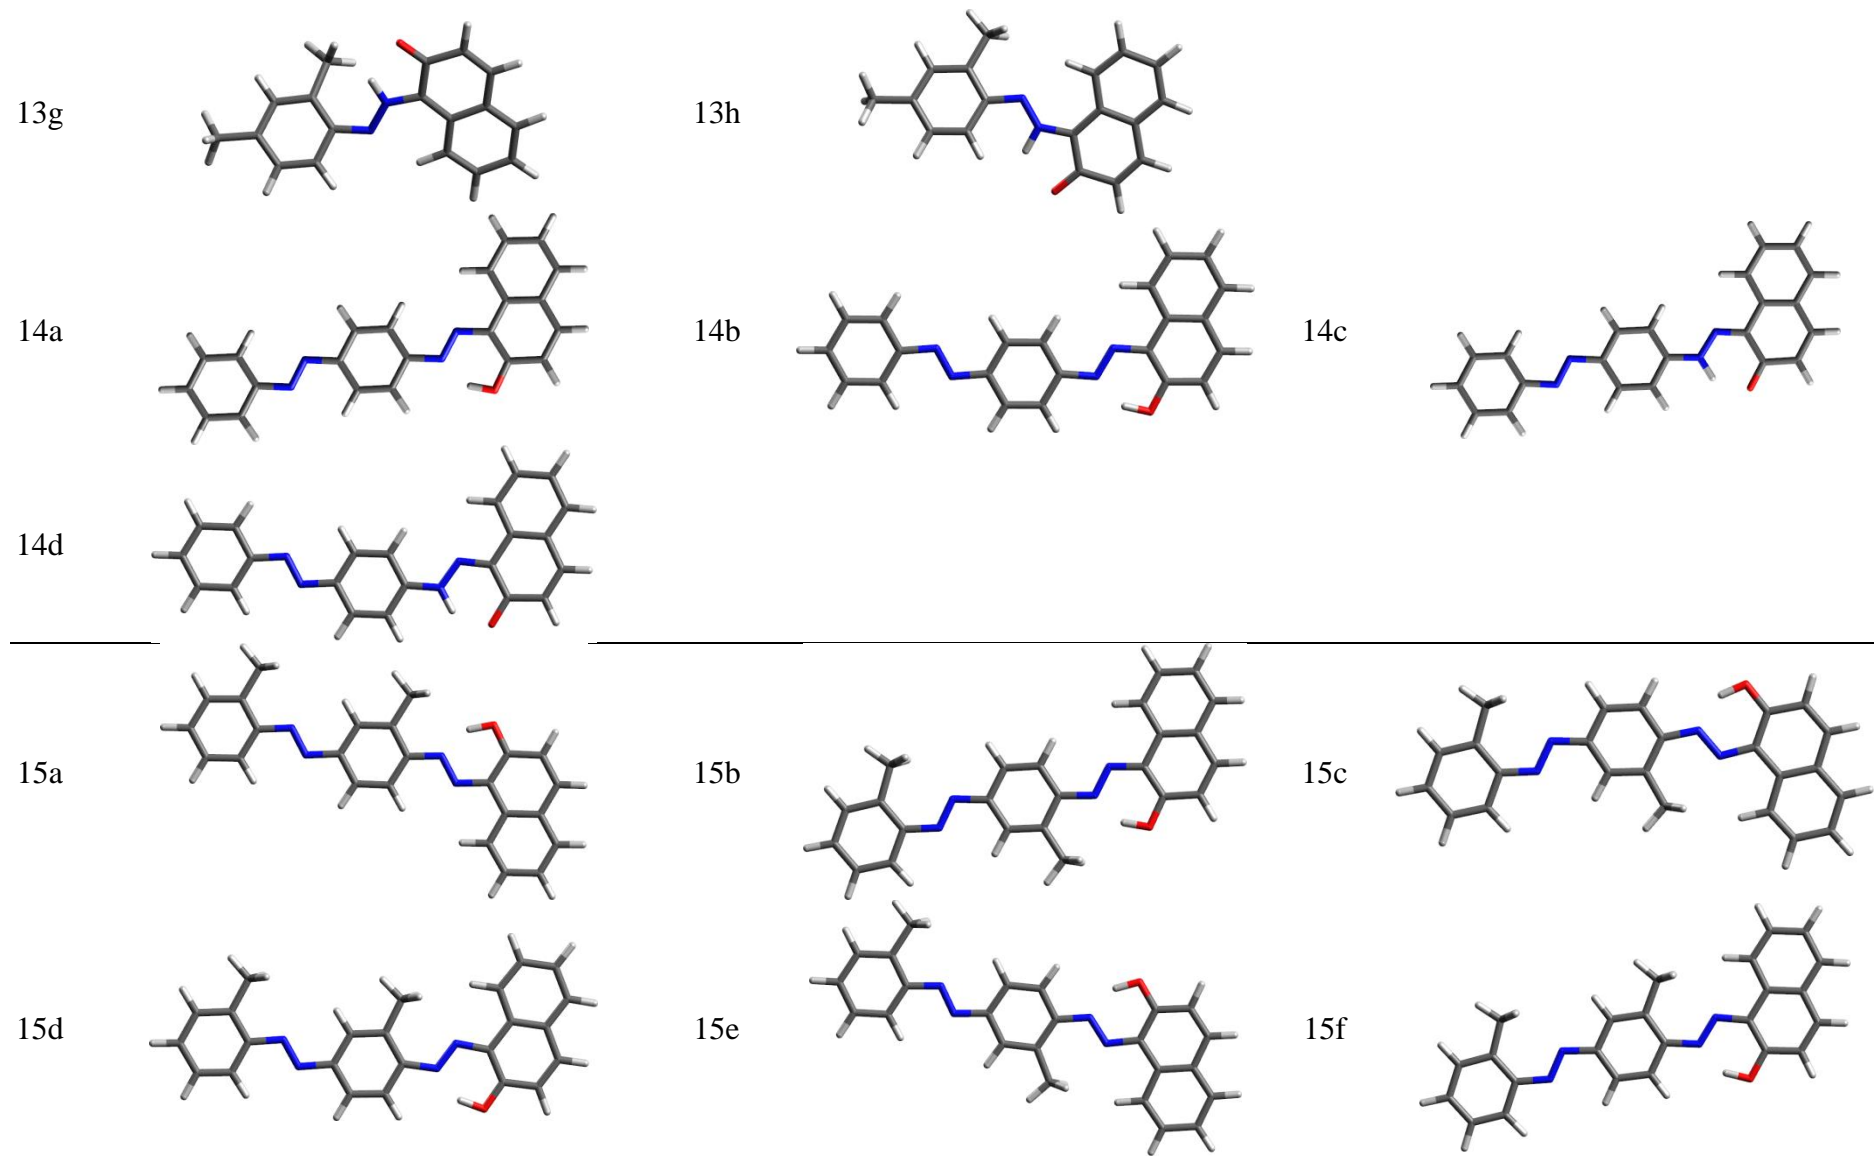

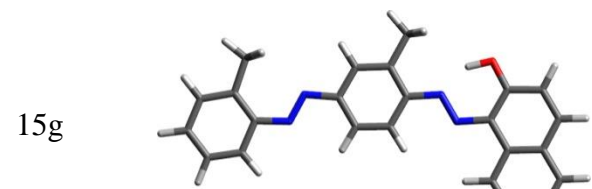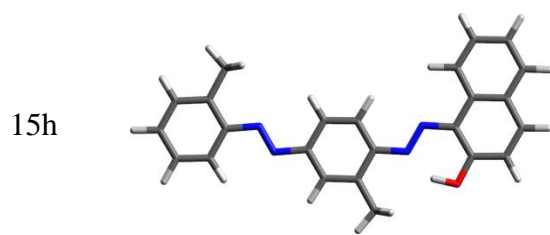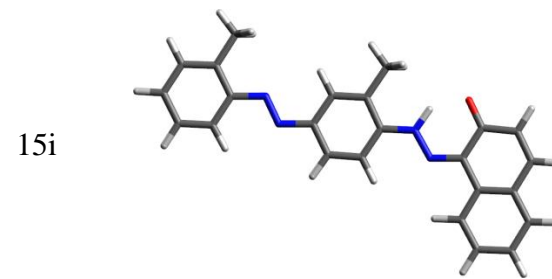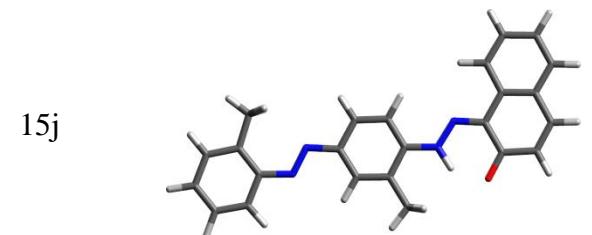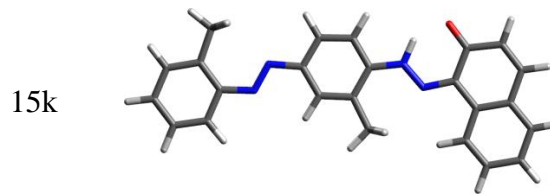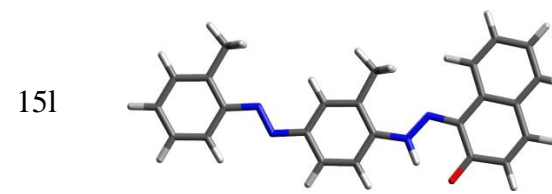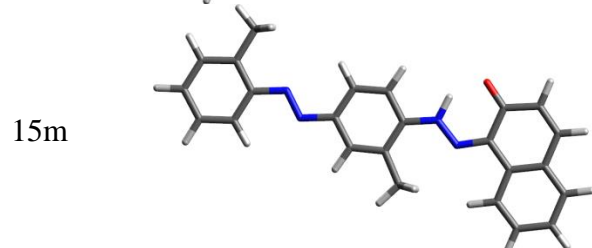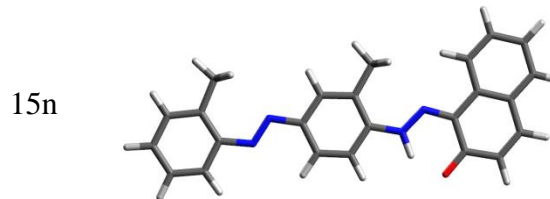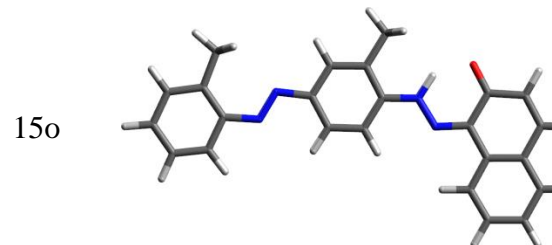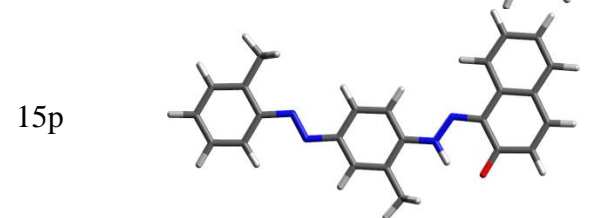

#### 4. Conformation energies, quadrupole tensors, surface tensors and visible transitions (allocation to bands) of dyes

**Table S2.** Calculated values of the energies,  $E$ , degeneracies,  $g$ , surface tensor components,  $T^{20}$  and  $T^{22}$ , quadrupole tensor components,  $Q_{xx}$ ,  $Q_{yy}$ ,  $Q_{zz}$ , Euler angles,  $\alpha'$ ,  $\beta'$  and  $\gamma'$ , between the surface tensor and quadrupole frames, angles,  $\alpha_{\text{TDM}}$  and  $\beta_{\text{TDM}}$ , between the surface tensor frames and the calculated TDM vectors, transition wavelengths,  $\lambda$ , oscillator strengths,  $f$ , and the allocations of the calculated transitions to either the short wavelength (sw) or long wavelength (lw) experimental absorption bands where applicable.

| Structure | $E / \text{kJ mol}^{-1}$ <sup>a</sup> | $g$   | $T^{20} / \text{\AA}^2$ | $T^{22} / \text{\AA}^2$ | $Q_{xx} / \text{D \AA}$ | $Q_{yy} / \text{D \AA}$ | $Q_{zz} / \text{D \AA}$ | $\alpha' / ^\circ$ | $\beta' / ^\circ$ | $\gamma' / ^\circ$ | $\lambda / \text{nm}$ | $f$ | $\alpha_{\text{TDM}} / ^\circ$ | $\beta_{\text{TDM}} / ^\circ$ | band <sup>b</sup> |   |
|-----------|---------------------------------------|-------|-------------------------|-------------------------|-------------------------|-------------------------|-------------------------|--------------------|-------------------|--------------------|-----------------------|-----|--------------------------------|-------------------------------|-------------------|---|
| <b>1</b>  | a                                     | 0.265 | 1                       | 155.0                   | 41.3                    | -39.3                   | -17.6                   | 56.9               | 180               | 1                  | -180                  | 434 | 0.292                          | 0                             | 9                 | - |
|           | b                                     | 0.217 | 2                       | 153.0                   | 36.7                    | -38.2                   | -18.1                   | 56.3               | -178              | 7                  | 180                   | 433 | 0.297                          | -7                            | 1                 | - |
|           | c                                     | 0.000 | 1                       | 158.2                   | 28.8                    | -37.3                   | -18.7                   | 55.9               | -180              | 12                 | -180                  | 433 | 0.302                          | 180                           | 5                 | - |
| <b>2</b>  | a                                     | 0.225 | 1                       | 151.5                   | 61.9                    | -23.1                   | -8.1                    | 31.1               | 0                 | 170                | 70                    | 519 | 0.376                          | 169                           | 11                | - |
|           | b                                     | 0.185 | 2                       | 146.3                   | 60.2                    | -22.4                   | -7.6                    | 30.0               | 174               | 166                | -115                  | 519 | 0.372                          | -18                           | 17                | - |
|           | c                                     | 0.382 | 1                       | 148.0                   | 58.5                    | -21.8                   | -7.5                    | 29.3               | -12               | 162                | 62                    | 518 | 0.370                          | 156                           | 23                | - |
|           | d                                     | 0.000 | 2                       | 144.8                   | 53.3                    | -18.3                   | -11.1                   | 29.5               | 4                 | 166                | 91                    | 521 | 0.364                          | 189                           | 19                | - |
|           |                                       |       |                         |                         |                         |                         |                         |                    |                   |                    |                       | 487 | 0.001                          | 107                           | 41                | - |
|           | e                                     | 0.208 | 1                       | 140.8                   | 46.6                    | -17.7                   | -10.9                   | 28.6               | 180               | 162                | -90                   | 518 | 0.362                          | 0                             | 25                | - |
| <b>3</b>  | f                                     | 0.255 | 1                       | 151.3                   | 56.5                    | -18.8                   | -12.1                   | 30.9               | -180              | 171                | -90                   | 521 | 0.368                          | 0                             | 12                | - |
|           | a                                     | 0.206 | 1                       | 151.3                   | 67.7                    | -27.0                   | -11.8                   | 38.8               | -176              | 3                  | 131                   | 610 | 0.582                          | 169                           | 14                | - |
|           | b                                     | 0.268 | 2                       | 146.1                   | 65.1                    | -26.2                   | -11.7                   | 37.9               | -10               | 8                  | -35                   | 610 | 0.576                          | -17                           | 20                | - |
|           | c                                     | 0.372 | 1                       | 147.4                   | 62.3                    | -25.6                   | -11.9                   | 37.4               | 165               | 13                 | 150                   | 610 | 0.571                          | 158                           | 27                | - |
|           | d                                     | 0.000 | 2                       | 143.1                   | 58.1                    | -21.7                   | -15.8                   | 37.5               | -174              | 9                  | 168                   | 611 | 0.568                          | 186                           | 22                | - |
|           | e                                     | 0.034 | 1                       | 138.9                   | 51.4                    | -21.2                   | -15.3                   | 36.5               | 0                 | 15                 | 0                     | 610 | 0.562                          | 0                             | 29                | - |
| <b>4</b>  | f                                     | 0.199 | 1                       | 148.8                   | 60.5                    | -22.3                   | -16.0                   | 38.3               | 180               | 4                  | -180                  | 611 | 0.573                          | 180                           | 15                | - |
|           | a                                     | 0.369 | 1                       | 152.7                   | 59.8                    | -28.6                   | -13.1                   | 41.8               | -3                | 171                | 117                   | 369 | 0.072                          | 38                            | 7                 | - |
|           |                                       |       |                         |                         |                         |                         |                         |                    |                   |                    |                       | 364 | 0.338                          | 35                            | 7                 | - |
|           | b                                     | 0.130 | 2                       | 147.6                   | 59.8                    | -27.7                   | -13.1                   | 40.8               | 175               | 168                | -125                  | 369 | 0.073                          | 163                           | 3                 | - |
|           |                                       |       |                         |                         |                         |                         |                         |                    |                   |                    |                       | 364 | 0.336                          | 169                           | 3                 | - |
|           | c                                     | 0.109 | 1                       | 147.8                   | 61.0                    | -26.9                   | -13.1                   | 40.0               | 10                | 164                | 129                   | 369 | 0.077                          | 243                           | 3                 | - |
| <b>5</b>  | d                                     | 0.191 | 2                       | 149.4                   | 55.3                    | -21.3                   | -19.6                   | 41.0               | -174              | 168                | -101                  | 404 | 0.007                          | 138                           | 5                 | - |
|           |                                       |       |                         |                         |                         |                         |                         |                    |                   |                    |                       | 364 | 0.405                          | 131                           | 4                 | - |
|           | e                                     | 0.181 | 1                       | 146.8                   | 55.3                    | -21.1                   | -18.8                   | 39.9               | 0                 | 164                | 90                    | 404 | 0.006                          | 180                           | 2                 | - |
|           |                                       |       |                         |                         |                         |                         |                         |                    |                   |                    |                       | 365 | 0.406                          | 180                           | 2                 | - |
|           | f                                     | 0.000 | 1                       | 152.0                   | 53.0                    | -21.3                   | -20.6                   | 41.9               | -180              | 172                | -90                   | 404 | 0.006                          | 180                           | 9                 | - |
|           |                                       |       |                         |                         |                         |                         |                         |                    |                   |                    |                       | 365 | 0.407                          | 180                           | 7                 | - |
| <b>6</b>  | a                                     | 0.176 | 1                       | 156.5                   | 57.2                    | -24.4                   | -8.0                    | 32.4               | 1                 | 167                | 125                   | 466 | 0.616                          | 92                            | 3                 | - |
|           | b                                     | 0.215 | 2                       | 151.8                   | 57.5                    | -23.0                   | -8.0                    | 31.1               | 177               | 163                | -128                  | 466 | 0.615                          | -12                           | 4                 | - |
|           | c                                     | 0.189 | 1                       | 152.2                   | 58.4                    | -21.9                   | -8.0                    | 29.9               | 5                 | 160                | 129                   | 466 | 0.612                          | 207                           | 10                | - |
|           | d                                     | 0.214 | 2                       | 152.7                   | 52.8                    | -16.2                   | -14.7                   | 30.9               | 2                 | 16                 | -32                   | 465 | 0.614                          | 33                            | 6                 | - |
|           | e                                     | 0.000 | 1                       | 150.4                   | 52.3                    | -14.7                   | -14.6                   | 29.3               | 0                 | 160                | 90                    | 465 | 0.611                          | 180                           | 10                | - |
|           | f                                     | 0.156 | 1                       | 156.0                   | 51.5                    | -16.8                   | -15.7                   | 32.5               | 0                 | 12                 | 0                     | 466 | 0.621                          | 180                           | 1                 | - |
| <b>6</b>  | a                                     | 0.000 | 1                       | 54.5                    | 64.7                    | -14.5                   | -1.6                    | 16.1               | 0                 | 180                | 90                    | 548 | 0.210                          | 180                           | 0                 | - |

| Structure | $E / \text{kJ mol}^{-1 \text{ a}}$ | $g$   | $T^{20} / \text{\AA}^2$ | $T^{22} / \text{\AA}^2$ | $Q_{xx} / \text{D \AA}$ | $Q_{yy} / \text{D \AA}$ | $Q_{zz} / \text{D \AA}$ | $\alpha' / ^\circ$ | $\beta' / ^\circ$ | $\gamma' / ^\circ$ | $\lambda / \text{nm}$ | $f$   | $\alpha_{\text{TDM}} / ^\circ$ | $\beta_{\text{TDM}} / ^\circ$ | band <sup>b</sup> |      |     |       |     |     |    |     |       |       |     |    |
|-----------|------------------------------------|-------|-------------------------|-------------------------|-------------------------|-------------------------|-------------------------|--------------------|-------------------|--------------------|-----------------------|-------|--------------------------------|-------------------------------|-------------------|------|-----|-------|-----|-----|----|-----|-------|-------|-----|----|
| <b>7</b>  | a                                  | 0.000 | 1                       | 102.5                   | 78.9                    | 7.3                     | 5.3                     | -12.6              | -90               | 90                 | 550                   | 0.212 | 180                            | 90                            | -                 |      |     |       |     |     |    |     |       |       |     |    |
|           | b                                  | 3.228 | 2                       | 78.8                    | 62.7                    | 8.2                     | 3.0                     | -11.2              | 90                | 104                | 550                   | 0.233 | 90                             | 9                             | -                 |      |     |       |     |     |    |     |       |       |     |    |
|           | c                                  | 3.044 | 2                       | 69.9                    | 62.1                    | 8.1                     | 3.1                     | -11.2              | -89               | 90                 | 550                   | 0.231 | -7                             | 0                             | -                 |      |     |       |     |     |    |     |       |       |     |    |
| <b>8</b>  | a                                  | 0.000 | 1                       | 69.7                    | 85.0                    | 13.5                    | 2.4                     | -16.0              | -93               | 90                 | 91                    | 580   | 0.255                          | -10                           | 89                | lw   |     |       |     |     |    |     |       |       |     |    |
|           |                                    |       |                         |                         |                         |                         |                         |                    |                   |                    |                       | 408   | 0.107                          | 180                           | 1                 | sw   |     |       |     |     |    |     |       |       |     |    |
|           |                                    |       |                         |                         |                         |                         |                         |                    |                   |                    |                       | 388   | 0.005                          | -13                           | 89                | sw   |     |       |     |     |    |     |       |       |     |    |
|           | b                                  | 0.929 | 1                       | 67.8                    | 74.9                    | 12.3                    | 2.2                     | -14.5              | -90               | 86                 | 90                    | 575   | 0.254                          | 180                           | 90                | lw   |     |       |     |     |    |     |       |       |     |    |
|           |                                    |       |                         |                         |                         |                         |                         |                    |                   |                    |                       | 423   | 0.076                          | -90                           | 11                | sw   |     |       |     |     |    |     |       |       |     |    |
|           |                                    |       |                         |                         |                         |                         |                         |                    |                   |                    |                       | 381   | 0.117                          | -90                           | 14                | sw   |     |       |     |     |    |     |       |       |     |    |
|           |                                    |       |                         |                         |                         |                         |                         |                    |                   |                    |                       | 367   | 0.067                          | -90                           | 12                | sw   |     |       |     |     |    |     |       |       |     |    |
|           |                                    |       |                         |                         |                         |                         |                         |                    |                   |                    |                       | 360   | 0.002                          | 180                           | 90                | sw   |     |       |     |     |    |     |       |       |     |    |
|           |                                    |       |                         |                         |                         |                         |                         |                    |                   |                    |                       | 360   | 0.002                          | 180                           | 90                | sw   |     |       |     |     |    |     |       |       |     |    |
|           | a                                  | 1.035 | 1                       | 105.8                   | 78.8                    | 8.5                     | 4.7                     | -13.2              | -83               | 90                 | 0                     | 576   | 0.271                          | -2                            | 0                 | lw   |     |       |     |     |    |     |       |       |     |    |
|           |                                    |       |                         |                         |                         |                         |                         |                    |                   |                    |                       | 423   | 0.083                          | 170                           | 90                | sw   |     |       |     |     |    |     |       |       |     |    |
|           |                                    |       |                         |                         |                         |                         |                         |                    |                   |                    |                       | 382   | 0.129                          | -13                           | 90                | sw   |     |       |     |     |    |     |       |       |     |    |
| 368       |                                    |       |                         |                         |                         |                         |                         |                    |                   |                    |                       | 0.067 | 168                            | 90                            | sw                |      |     |       |     |     |    |     |       |       |     |    |
| 360       |                                    |       |                         |                         |                         |                         |                         |                    |                   |                    |                       | 0.001 | -11                            | 1                             | sw                |      |     |       |     |     |    |     |       |       |     |    |
| b         |                                    |       |                         |                         |                         |                         |                         |                    |                   |                    |                       | 0.044 | 1                              | 108.0                         | 79.8              | 10.2 | 4.0 | -14.3 | -90 | 81  | 0  | 580 | 0.273 | 269   | 2   | lw |
|           |                                    |       |                         |                         |                         |                         |                         |                    |                   |                    |                       |       |                                |                               |                   |      |     |       |     |     |    | 408 | 0.114 | 0     | 90  | sw |
|           |                                    |       |                         |                         |                         |                         |                         |                    |                   |                    |                       |       |                                |                               |                   |      |     |       |     |     |    | 388 | 0.005 | 269   | 3   | sw |
|           |                                    |       |                         |                         |                         |                         |                         |                    |                   |                    |                       |       |                                |                               |                   |      |     |       |     |     |    | 384 | 0.150 | 0     | 90  | sw |
|           | c                                  | 0.913 | 2                       | 71.1                    | 83.0                    | 8.0                     | 4.6                     | -12.7              | -80               | 91                 | -22                   |       |                                |                               |                   |      |     |       |     |     |    | 575 | 0.264 | 5     | 37  | lw |
|           |                                    |       |                         |                         |                         |                         |                         |                    |                   |                    |                       |       |                                |                               |                   |      |     |       |     |     |    | 424 | 0.087 | 173   | 53  | sw |
| 382       |                                    |       |                         |                         |                         |                         |                         |                    |                   |                    |                       | 0.133 | 168                            | 53                            | sw                |      |     |       |     |     |    |     |       |       |     |    |
| 366       |                                    |       |                         |                         |                         |                         |                         |                    |                   |                    |                       | 0.073 | 171                            | 52                            | sw                |      |     |       |     |     |    |     |       |       |     |    |
| 360       |                                    |       |                         |                         |                         |                         |                         |                    |                   |                    |                       | 0.002 | 9                              | 35                            | sw                |      |     |       |     |     |    |     |       |       |     |    |
| d         |                                    |       |                         |                         |                         |                         |                         |                    |                   |                    |                       | 0.000 | 2                              | 74.7                          | 87.9              | 9.6  | 5.0 | -14.6 | -92 | 88  | 22 | 581 | 0.265 | 212   | 12  | lw |
|           | 410                                | 0.123 | -4                      | 81                      | sw                      |                         |                         |                    |                   |                    |                       |       |                                |                               |                   |      |     |       |     |     |    |     |       |       |     |    |
|           | 387                                | 0.005 | 220                     | 14                      | sw                      |                         |                         |                    |                   |                    |                       |       |                                |                               |                   |      |     |       |     |     |    |     |       |       |     |    |
|           | 385                                | 0.156 | -4                      | 81                      | sw                      |                         |                         |                    |                   |                    |                       |       |                                |                               |                   |      |     |       |     |     |    |     |       |       |     |    |
|           | e                                  | 0.039 | 1                       | 92.4                    | 75.8                    | 8.9                     | 6.1                     | -15.0              | -95               | 90                 | 90                    |       |                                |                               |                   |      |     |       |     |     |    | 581 | 0.258 | -12   | 90  | lw |
|           |                                    |       |                         |                         |                         |                         |                         |                    |                   |                    |                       |       |                                |                               |                   |      |     |       |     |     |    | 410 | 0.129 | 243   | 0   | sw |
| 387       |                                    |       |                         |                         |                         |                         |                         |                    |                   |                    |                       | 0.006 | -16                            | 90                            | sw                |      |     |       |     |     |    |     |       |       |     |    |
| 385       |                                    |       |                         |                         |                         |                         |                         |                    |                   |                    |                       | 0.162 | 183                            | 0                             | sw                |      |     |       |     |     |    |     |       |       |     |    |
| f         |                                    |       |                         |                         |                         |                         |                         |                    |                   |                    |                       | 0.972 | 1                              | 91.3                          | 65.7              | 7.6  | 5.1 | -12.7 | -90 | 100 | 90 | 575 | 0.259 | 180   | 90  | lw |
|           |                                    |       |                         |                         |                         |                         |                         |                    |                   |                    |                       |       |                                |                               |                   |      |     |       |     |     |    | 424 | 0.091 | 90    | 2   | sw |
|           | 382                                | 0.140 | 90                      | 6                       | sw                      |                         |                         |                    |                   |                    |                       |       |                                |                               |                   |      |     |       |     |     |    |     |       |       |     |    |
|           | 367                                | 0.075 | 90                      | 3                       | sw                      |                         |                         |                    |                   |                    |                       |       |                                |                               |                   |      |     |       |     |     |    |     |       |       |     |    |
|           | 360                                | 0.002 | 0                       | 90                      | sw                      |                         |                         |                    |                   |                    |                       |       |                                |                               |                   |      |     |       |     |     |    |     |       |       |     |    |
|           | <b>10</b>                          | a     | 0.019                   | 1                       | 154.0                   | 98.4                    | -28.3                   | -8.2               | 36.5              | 0                  | 180                   |       |                                |                               |                   |      |     |       |     |     |    | 76  | 493   | 0.164 | 183 | 90 |
| 368       |                                    |       |                         |                         |                         |                         |                         |                    |                   |                    |                       | 0.039 | -16                            | 0                             | sw                |      |     |       |     |     |    |     |       |       |     |    |
| 356       |                                    |       |                         |                         |                         |                         |                         |                    |                   |                    |                       | 0.090 | -16                            | 0                             | sw                |      |     |       |     |     |    |     |       |       |     |    |

| Structure | $E / \text{kJ mol}^{-1}$ <sup>a</sup> | $g$ | $T^{20} / \text{\AA}^2$ | $T^{22} / \text{\AA}^2$ | $Q_{xx} / \text{D \AA}$ | $Q_{yy} / \text{D \AA}$ | $Q_{zz} / \text{D \AA}$ | $\alpha' / ^\circ$ | $\beta' / ^\circ$ | $\gamma' / ^\circ$ | $\lambda / \text{nm}$ | $f$   | $\alpha_{\text{TDM}} / ^\circ$ | $\beta_{\text{TDM}} / ^\circ$ | band <sup>b</sup> |
|-----------|---------------------------------------|-----|-------------------------|-------------------------|-------------------------|-------------------------|-------------------------|--------------------|-------------------|--------------------|-----------------------|-------|--------------------------------|-------------------------------|-------------------|
|           |                                       |     |                         |                         |                         |                         |                         |                    |                   |                    | 355                   | 0.003 | 4                              | 90                            | sw                |
|           |                                       |     |                         |                         |                         |                         |                         |                    |                   |                    | 346                   | 0.173 | -16                            | 0                             | sw                |
|           |                                       |     |                         |                         |                         |                         |                         |                    |                   |                    | 336                   | 0.016 | -16                            | 0                             | sw                |
|           |                                       |     |                         |                         |                         |                         |                         |                    |                   |                    | 333                   | 0.150 | -16                            | 0                             | sw                |
|           |                                       |     |                         |                         |                         |                         |                         |                    |                   |                    | 332                   | 0.005 | 173                            | 90                            | sw                |
| b         | 0.264                                 | 1   | 150.6                   | 91.3                    | -28.0                   | -7.4                    | 35.4                    | 0                  | 180               | 88                 | 493                   | 0.168 | 173                            | 90                            | lw                |
|           |                                       |     |                         |                         |                         |                         |                         |                    |                   |                    | 367                   | 0.038 | -1                             | 0                             | sw                |
|           |                                       |     |                         |                         |                         |                         |                         |                    |                   |                    | 356                   | 0.095 | -1                             | 0                             | sw                |
|           |                                       |     |                         |                         |                         |                         |                         |                    |                   |                    | 355                   | 0.002 | 12                             | 90                            | sw                |
|           |                                       |     |                         |                         |                         |                         |                         |                    |                   |                    | 346                   | 0.171 | -1                             | 0                             | sw                |
|           |                                       |     |                         |                         |                         |                         |                         |                    |                   |                    | 336                   | 0.017 | -1                             | 0                             | sw                |
|           |                                       |     |                         |                         |                         |                         |                         |                    |                   |                    | 333                   | 0.148 | -1                             | 0                             | sw                |
|           |                                       |     |                         |                         |                         |                         |                         |                    |                   |                    | 332                   | 0.004 | 187                            | 90                            | sw                |
| c         | 0.000                                 | 1   | 158.1                   | 96.9                    | -27.9                   | -8.3                    | 36.2                    | 141                | 175               | -136               | 493                   | 0.165 | 175                            | 84                            | lw                |
|           |                                       |     |                         |                         |                         |                         |                         |                    |                   |                    | 368                   | 0.040 | -45                            | 6                             | sw                |
|           |                                       |     |                         |                         |                         |                         |                         |                    |                   |                    | 356                   | 0.091 | -44                            | 6                             | sw                |
|           |                                       |     |                         |                         |                         |                         |                         |                    |                   |                    | 355                   | 0.003 | -1                             | 74                            | sw                |
|           |                                       |     |                         |                         |                         |                         |                         |                    |                   |                    | 346                   | 0.175 | -45                            | 7                             | sw                |
|           |                                       |     |                         |                         |                         |                         |                         |                    |                   |                    | 336                   | 0.017 | -46                            | 6                             | sw                |
|           |                                       |     |                         |                         |                         |                         |                         |                    |                   |                    | 333                   | 0.147 | -45                            | 6                             | sw                |
|           |                                       |     |                         |                         |                         |                         |                         |                    |                   |                    | 332                   | 0.005 | 186                            | 89                            | sw                |
| 11 a      | 0.000                                 | 1   | 143.2                   | 60.4                    | 16.5                    | 5.7                     | -22.2                   | -97                | 93                | 92                 | 419                   | 0.003 | -14                            | 87                            | -                 |
|           |                                       |     |                         |                         |                         |                         |                         |                    |                   |                    | 344                   | 0.090 | -11                            | 87                            | -                 |
| b         | 0.299                                 | 1   | 143.0                   | 52.4                    | 18.0                    | 6.4                     | -24.4                   | -98                | 79                | 99                 | 377                   | 0.004 | -6                             | 81                            | -                 |
|           |                                       |     |                         |                         |                         |                         |                         |                    |                   |                    | 343                   | 0.084 | -6                             | 84                            | -                 |
| 12 a      | 0.000                                 | 1   | 56.6                    | 41.5                    | 11.6                    | 1.4                     | -13.0                   | 90                 | 90                | 179                | 320                   | 0.792 | 0                              | 2                             | -                 |
| 13 a      | 3.772                                 | 1   | 77.4                    | 67.0                    | -15.6                   | -1.1                    | 16.7                    | -180               | 176               | -90                | 418                   | 0.584 | 0                              | 7                             | -                 |
| b         | 14.808                                | 1   | 81.8                    | 66.5                    | -15.4                   | -2.2                    | 17.6                    | 7                  | 174               | 97                 | 409                   | 0.568 | 182                            | 11                            | -                 |
| c         | 39.506                                | 1   | 78.9                    | 68.0                    | -15.7                   | -1.8                    | 17.5                    | -12                | 176               | 77                 | 401                   | 0.629 | 4                              | 4                             | -                 |
| d         | 28.669                                | 1   | 78.0                    | 63.5                    | -14.7                   | -2.0                    | 16.7                    | -19                | 178               | 67                 | 478                   | 0.050 | 175                            | 9                             | -                 |
|           |                                       |     |                         |                         |                         |                         |                         |                    |                   |                    | 404                   | 0.573 | 173                            | 11                            | -                 |
| e         | 0.000                                 | 1   | 77.7                    | 67.1                    | -14.9                   | -2.5                    | 17.4                    | 180                | 179               | -90                | 432                   | 0.573 | 180                            | 8                             | -                 |
| f         | 12.886                                | 1   | 81.7                    | 66.6                    | -14.4                   | -3.9                    | 18.4                    | 11                 | 178               | 101                | 425                   | 0.568 | 181                            | 11                            | -                 |
| g         | 65.001                                | 1   | 74.2                    | 51.7                    | -14.5                   | -5.8                    | 20.3                    | 87                 | 179               | -156               | 471                   | 0.521 | 12                             | 13                            | -                 |
| h         | 51.653                                | 1   | 77.8                    | 63.9                    | -14.3                   | -6.4                    | 20.7                    | -28                | 178               | 82                 | 481                   | 0.577 | 187                            | 14                            | -                 |
| 14 a      | 5.476                                 | 1   | 107.3                   | 85.4                    | -23.7                   | -2.8                    | 26.5                    | -180               | 178               | -90                | 468                   | 1.154 | 180                            | 4                             | lw                |
|           |                                       |     |                         |                         |                         |                         |                         |                    |                   |                    | 372                   | 0.170 | 0                              | 16                            | sw                |
|           |                                       |     |                         |                         |                         |                         |                         |                    |                   |                    | 356                   | 0.148 | 180                            | 20                            | sw                |
|           |                                       |     |                         |                         |                         |                         |                         |                    |                   |                    | 337                   | 0.140 | 180                            | 7                             | sw                |
| b         | 5.533                                 | 1   | 104.2                   | 86.6                    | -23.3                   | -1.8                    | 25.1                    | 180                | 176               | -90                | 464                   | 1.132 | 180                            | 1                             | lw                |
|           |                                       |     |                         |                         |                         |                         |                         |                    |                   |                    | 370                   | 0.154 | 0                              | 19                            | sw                |
|           |                                       |     |                         |                         |                         |                         |                         |                    |                   |                    | 355                   | 0.130 | 180                            | 19                            | sw                |

| Structure | $E / \text{kJ mol}^{-1 \text{ a}}$ | $g$ | $T^{20} / \text{\AA}^2$ | $T^{22} / \text{\AA}^2$ | $Q_{xx} / \text{D \AA}$ | $Q_{yy} / \text{D \AA}$ | $Q_{zz} / \text{D \AA}$ | $\alpha' / ^\circ$ | $\beta' / ^\circ$ | $\gamma' / ^\circ$ | $\lambda / \text{nm}$ | $f$    | $\alpha_{\text{TDM}} / ^\circ$ | $\beta_{\text{TDM}} / ^\circ$ | band <sup>b</sup> |       |      |      |      |     |     |     |       |     |    |    |
|-----------|------------------------------------|-----|-------------------------|-------------------------|-------------------------|-------------------------|-------------------------|--------------------|-------------------|--------------------|-----------------------|--------|--------------------------------|-------------------------------|-------------------|-------|------|------|------|-----|-----|-----|-------|-----|----|----|
| c         | 0.000                              | 1   | 107.5                   | 85.5                    | -22.3                   | -4.4                    | 26.7                    | 180                | 173               | -90                | 339                   | 0.203  | 180                            | 14                            | sw                |       |      |      |      |     |     |     |       |     |    |    |
|           |                                    |     |                         |                         |                         |                         |                         |                    |                   |                    | 468                   | 1.231  | 180                            | 4                             | lw                |       |      |      |      |     |     |     |       |     |    |    |
|           |                                    |     |                         |                         |                         |                         |                         |                    |                   |                    | 381                   | 0.080  | 0                              | 32                            | sw                |       |      |      |      |     |     |     |       |     |    |    |
|           |                                    |     |                         |                         |                         |                         |                         |                    |                   |                    | 357                   | 0.098  | 0                              | 14                            | sw                |       |      |      |      |     |     |     |       |     |    |    |
|           |                                    |     |                         |                         |                         |                         |                         |                    |                   |                    | 337                   | 0.180  | 180                            | 13                            | sw                |       |      |      |      |     |     |     |       |     |    |    |
| d         | 0.355                              | 1   | 104.5                   | 86.7                    | -21.8                   | -3.4                    | 25.2                    | -180               | 169               | -90                | 465                   | 1.208  | 180                            | 1                             | lw                |       |      |      |      |     |     |     |       |     |    |    |
|           |                                    |     |                         |                         |                         |                         |                         |                    |                   |                    | 380                   | 0.072  | 0                              | 37                            | sw                |       |      |      |      |     |     |     |       |     |    |    |
|           |                                    |     |                         |                         |                         |                         |                         |                    |                   |                    | 360                   | 0.097  | 0                              | 10                            | sw                |       |      |      |      |     |     |     |       |     |    |    |
|           |                                    |     |                         |                         |                         |                         |                         |                    |                   |                    | 336                   | 0.188  | 180                            | 19                            | sw                |       |      |      |      |     |     |     |       |     |    |    |
|           |                                    |     |                         |                         |                         |                         |                         |                    |                   |                    | 337                   | 0.180  | 180                            | 13                            | sw                |       |      |      |      |     |     |     |       |     |    |    |
| 15 a      | 6.505                              | 1   | 114.1                   | 96.1                    | -22.3                   | -1.3                    | 23.6                    | 180                | 173               | -90                | 477                   | 1.221  | 180                            | 4                             | lw                |       |      |      |      |     |     |     |       |     |    |    |
|           |                                    |     |                         |                         |                         |                         |                         |                    |                   |                    | 376                   | 0.196  | 0                              | 9                             | sw                |       |      |      |      |     |     |     |       |     |    |    |
|           |                                    |     |                         |                         |                         |                         |                         |                    |                   |                    | 363                   | 0.046  | 180                            | 41                            | sw                |       |      |      |      |     |     |     |       |     |    |    |
|           |                                    |     |                         |                         |                         |                         |                         |                    |                   |                    | 343                   | 0.072  | 180                            | 7                             | sw                |       |      |      |      |     |     |     |       |     |    |    |
|           |                                    |     |                         |                         |                         |                         |                         |                    |                   |                    | 338                   | 0.023  | 0                              | 52                            | sw                |       |      |      |      |     |     |     |       |     |    |    |
|           |                                    |     |                         |                         |                         |                         |                         |                    |                   |                    | 337                   | 0.047  | 180                            | 29                            | sw                |       |      |      |      |     |     |     |       |     |    |    |
|           |                                    |     |                         |                         |                         |                         |                         |                    |                   |                    | b                     | 15.443 | 1                              | 114.2                         | 94.5              | -22.6 | -1.0 | 23.6 | -180 | 180 | -90 | 471 | 1.194 | 0   | 5  | lw |
|           |                                    |     |                         |                         |                         |                         |                         |                    |                   |                    |                       |        |                                |                               |                   |       |      |      |      |     |     | 371 | 0.174 | 180 | 11 | sw |
|           |                                    |     |                         |                         |                         |                         |                         |                    |                   |                    |                       |        |                                |                               |                   |       |      |      |      |     |     | 357 | 0.080 | 0   | 33 | sw |
|           |                                    |     |                         |                         |                         |                         |                         |                    |                   |                    |                       |        |                                |                               |                   |       |      |      |      |     |     | 337 | 0.093 | 0   | 24 | sw |
| 335       | 0.033                              | 180 | 20                      | sw                      |                         |                         |                         |                    |                   |                    |                       |        |                                |                               |                   |       |      |      |      |     |     |     |       |     |    |    |
| 328       | 0.065                              | 180 | 14                      | sw                      |                         |                         |                         |                    |                   |                    |                       |        |                                |                               |                   |       |      |      |      |     |     |     |       |     |    |    |
| c         | 27.420                             | 1   | 115.8                   | 95.5                    | -22.1                   | -1.7                    | 23.8                    | 180                | 175               | -90                |                       |        |                                |                               |                   |       |      |      |      |     |     | 462 | 1.161 | 180 | 3  | lw |
|           |                                    |     |                         |                         |                         |                         |                         |                    |                   |                    |                       |        |                                |                               |                   |       |      |      |      |     |     | 366 | 0.192 | 0   | 14 | sw |
|           |                                    |     |                         |                         |                         |                         |                         |                    |                   |                    |                       |        |                                |                               |                   |       |      |      |      |     |     | 352 | 0.122 | 180 | 20 | sw |
|           |                                    |     |                         |                         |                         |                         |                         |                    |                   |                    |                       |        |                                |                               |                   |       |      |      |      |     |     | 337 | 0.128 | 180 | 9  | sw |
|           |                                    |     |                         |                         |                         |                         |                         |                    |                   |                    | 329                   | 0.022  | 0                              | 62                            | sw                |       |      |      |      |     |     |     |       |     |    |    |
|           |                                    |     |                         |                         |                         |                         |                         |                    |                   |                    | 324                   | 0.069  | 180                            | 26                            | sw                |       |      |      |      |     |     |     |       |     |    |    |
|           |                                    |     |                         |                         |                         |                         |                         |                    |                   |                    | d                     | 18.730 | 1                              | 116.4                         | 96.8              | -21.2 | -0.6 | 21.8 | 0    | 178 | 90  | 468 | 1.179 | 180 | 5  | lw |
|           |                                    |     |                         |                         |                         |                         |                         |                    |                   |                    |                       |        |                                |                               |                   |       |      |      |      |     |     | 370 | 0.224 | 0   | 6  | sw |
|           |                                    |     |                         |                         |                         |                         |                         |                    |                   |                    |                       |        |                                |                               |                   |       |      |      |      |     |     | 357 | 0.095 | 180 | 34 | sw |
|           |                                    |     |                         |                         |                         |                         |                         |                    |                   |                    |                       |        |                                |                               |                   |       |      |      |      |     |     | 343 | 0.090 | 180 | 23 | sw |
| 333       | 0.030                              | 0   | 8                       | sw                      |                         |                         |                         |                    |                   |                    |                       |        |                                |                               |                   |       |      |      |      |     |     |     |       |     |    |    |
| 331       | 0.027                              | 0   | 52                      | sw                      |                         |                         |                         |                    |                   |                    |                       |        |                                |                               |                   |       |      |      |      |     |     |     |       |     |    |    |
| e         | 18.181                             | 1   | 116.6                   | 94.0                    | -22.0                   | -1.8                    | 23.8                    | 0                  | 175               | 90                 |                       |        |                                |                               |                   |       |      |      |      |     |     | 470 | 1.194 | 0   | 7  | lw |
|           |                                    |     |                         |                         |                         |                         |                         |                    |                   |                    |                       |        |                                |                               |                   |       |      |      |      |     |     | 371 | 0.245 | 180 | 9  | sw |
|           |                                    |     |                         |                         |                         |                         |                         |                    |                   |                    |                       |        |                                |                               |                   |       |      |      |      |     |     | 358 | 0.073 | 0   | 27 | sw |
|           |                                    |     |                         |                         |                         |                         |                         |                    |                   |                    |                       |        |                                |                               |                   |       |      |      |      |     |     | 342 | 0.066 | 180 | 8  | sw |
|           |                                    |     |                         |                         |                         |                         |                         |                    |                   |                    | 334                   | 0.027  | 0                              | 70                            | sw                |       |      |      |      |     |     |     |       |     |    |    |
|           |                                    |     |                         |                         |                         |                         |                         |                    |                   |                    | 330                   | 0.062  | 180                            | 13                            | sw                |       |      |      |      |     |     |     |       |     |    |    |
|           |                                    |     |                         |                         |                         |                         |                         |                    |                   |                    | f                     | 27.210 | 1                              | 118.7                         | 93.6              | -22.2 | -2.0 | 24.2 | -180 | 179 | -90 | 463 | 1.172 | 0   | 7  | lw |
|           |                                    |     |                         |                         |                         |                         |                         |                    |                   |                    |                       |        |                                |                               |                   |       |      |      |      |     |     | 366 | 0.205 | 180 | 10 | sw |
|           |                                    |     |                         |                         |                         |                         |                         |                    |                   |                    |                       |        |                                |                               |                   |       |      |      |      |     |     | 352 | 0.115 | 0   | 26 | sw |



| Structure | $E / \text{kJ mol}^{-1 \text{ a}}$ | $g$ | $T^{20} / \text{\AA}^2$ | $T^{22} / \text{\AA}^2$ | $Q_{xx} / \text{D \AA}$ | $Q_{yy} / \text{D \AA}$ | $Q_{zz} / \text{D \AA}$ | $\alpha' / ^\circ$ | $\beta' / ^\circ$ | $\gamma' / ^\circ$ | $\lambda / \text{nm}$ | $f$   | $\alpha_{\text{TDM}} / ^\circ$ | $\beta_{\text{TDM}} / ^\circ$ | band <sup>b</sup> |
|-----------|------------------------------------|-----|-------------------------|-------------------------|-------------------------|-------------------------|-------------------------|--------------------|-------------------|--------------------|-----------------------|-------|--------------------------------|-------------------------------|-------------------|
| g         | 15.496                             | 1   | 109.6                   | 95.9                    | -22.6                   | -0.2                    | 22.7                    | 180                | 172               | -90                | 336                   | 0.093 | 0                              | 7                             | sw                |
|           |                                    |     |                         |                         |                         |                         |                         |                    |                   |                    | 330                   | 0.012 | 180                            | 30                            | sw                |
|           |                                    |     |                         |                         |                         |                         |                         |                    |                   |                    | 324                   | 0.117 | 180                            | 21                            | sw                |
|           |                                    |     |                         |                         |                         |                         |                         |                    |                   |                    | 468                   | 1.161 | 0                              | 0                             | lw                |
|           |                                    |     |                         |                         |                         |                         |                         |                    |                   |                    | 370                   | 0.156 | 0                              | 16                            | sw                |
|           |                                    |     |                         |                         |                         |                         |                         |                    |                   |                    | 356                   | 0.066 | 180                            | 29                            | sw                |
|           |                                    |     |                         |                         |                         |                         |                         |                    |                   |                    | 339                   | 0.158 | 180                            | 18                            | sw                |
|           |                                    |     |                         |                         |                         |                         |                         |                    |                   |                    | 333                   | 0.010 | 0                              | 59                            | sw                |
|           |                                    |     |                         |                         |                         |                         |                         |                    |                   |                    | 326                   | 0.061 | 180                            | 41                            | sw                |
| h         | 6.390                              | 1   | 107.8                   | 96.2                    | 20.3                    | 1.4                     | -21.8                   | 90                 | 90                | 179                | 473                   | 1.180 | 0                              | 2                             | lw                |
|           |                                    |     |                         |                         |                         |                         |                         |                    |                   |                    | 374                   | 0.164 | 180                            | 7                             | sw                |
|           |                                    |     |                         |                         |                         |                         |                         |                    |                   |                    | 361                   | 0.050 | 0                              | 50                            | sw                |
|           |                                    |     |                         |                         |                         |                         |                         |                    |                   |                    | 345                   | 0.135 | 0                              | 32                            | sw                |
|           |                                    |     |                         |                         |                         |                         |                         |                    |                   |                    | 336                   | 0.032 | 180                            | 40                            | sw                |
|           |                                    |     |                         |                         |                         |                         |                         |                    |                   |                    | 334                   | 0.021 | 0                              | 32                            | sw                |
|           |                                    |     |                         |                         |                         |                         |                         |                    |                   |                    | 479                   | 1.241 | 180                            | 5                             | lw                |
|           |                                    |     |                         |                         |                         |                         |                         |                    |                   |                    | 383                   | 0.051 | 0                              | 38                            | sw                |
|           |                                    |     |                         |                         |                         |                         |                         |                    |                   |                    | 363                   | 0.123 | 0                              | 11                            | sw                |
| i         | 0.000                              | 1   | 114.3                   | 96.2                    | -21.2                   | -3.4                    | 24.6                    | -180               | 167               | -90                | 345                   | 0.119 | 180                            | 12                            | sw                |
|           |                                    |     |                         |                         |                         |                         |                         |                    |                   |                    | 333                   | 0.029 | 180                            | 46                            | sw                |
|           |                                    |     |                         |                         |                         |                         |                         |                    |                   |                    | 327                   | 0.011 | 0                              | 44                            | sw                |
|           |                                    |     |                         |                         |                         |                         |                         |                    |                   |                    | 474                   | 1.209 | 0                              | 6                             | lw                |
|           |                                    |     |                         |                         |                         |                         |                         |                    |                   |                    | 380                   | 0.059 | 180                            | 35                            | sw                |
|           |                                    |     |                         |                         |                         |                         |                         |                    |                   |                    | 357                   | 0.116 | 180                            | 10                            | sw                |
|           |                                    |     |                         |                         |                         |                         |                         |                    |                   |                    | 339                   | 0.162 | 0                              | 20                            | sw                |
|           |                                    |     |                         |                         |                         |                         |                         |                    |                   |                    | 326                   | 0.006 | 180                            | 62                            | sw                |
|           |                                    |     |                         |                         |                         |                         |                         |                    |                   |                    | 325                   | 0.043 | 180                            | 17                            | sw                |
| j         | 9.073                              | 1   | 114.3                   | 94.6                    | -21.5                   | -2.5                    | 24.0                    | 0                  | 174               | 90                 | 467                   | 1.244 | 180                            | 4                             | lw                |
|           |                                    |     |                         |                         |                         |                         |                         |                    |                   |                    | 377                   | 0.081 | 0                              | 30                            | sw                |
|           |                                    |     |                         |                         |                         |                         |                         |                    |                   |                    | 359                   | 0.093 | 0                              | 13                            | sw                |
|           |                                    |     |                         |                         |                         |                         |                         |                    |                   |                    | 336                   | 0.150 | 180                            | 10                            | sw                |
|           |                                    |     |                         |                         |                         |                         |                         |                    |                   |                    | 322                   | 0.044 | 180                            | 45                            | sw                |
|           |                                    |     |                         |                         |                         |                         |                         |                    |                   |                    | 320                   | 0.019 | 0                              | 15                            | sw                |
|           |                                    |     |                         |                         |                         |                         |                         |                    |                   |                    | 472                   | 1.274 | 180                            | 5                             | lw                |
|           |                                    |     |                         |                         |                         |                         |                         |                    |                   |                    | 380                   | 0.067 | 0                              | 27                            | sw                |
|           |                                    |     |                         |                         |                         |                         |                         |                    |                   |                    | 365                   | 0.090 | 0                              | 13                            | sw                |
| k         | 23.071                             | 1   | 115.9                   | 95.5                    | -20.7                   | -3.7                    | 24.4                    | -180               | 169               | -90                | 342                   | 0.126 | 180                            | 28                            | sw                |
|           |                                    |     |                         |                         |                         |                         |                         |                    |                   |                    | 330                   | 0.031 | 0                              | 16                            | sw                |
|           |                                    |     |                         |                         |                         |                         |                         |                    |                   |                    | 322                   | 0.011 | 0                              | 67                            | sw                |
|           |                                    |     |                         |                         |                         |                         |                         |                    |                   |                    | 474                   | 1.280 | 0                              | 7                             | lw                |
|           |                                    |     |                         |                         |                         |                         |                         |                    |                   |                    | 380                   | 0.078 | 180                            | 25                            | sw                |
|           |                                    |     |                         |                         |                         |                         |                         |                    |                   |                    | 364                   | 0.105 | 180                            | 18                            | sw                |
|           |                                    |     |                         |                         |                         |                         |                         |                    |                   |                    | 472                   | 1.274 | 180                            | 5                             | lw                |
|           |                                    |     |                         |                         |                         |                         |                         |                    |                   |                    | 380                   | 0.067 | 0                              | 27                            | sw                |
|           |                                    |     |                         |                         |                         |                         |                         |                    |                   |                    | 365                   | 0.090 | 0                              | 13                            | sw                |
| l         | 14.228                             | 1   | 116.6                   | 96.7                    | -19.7                   | -2.2                    | 21.9                    | -180               | 174               | -90                | 330                   | 0.031 | 0                              | 16                            | sw                |
|           |                                    |     |                         |                         |                         |                         |                         |                    |                   |                    | 322                   | 0.011 | 0                              | 67                            | sw                |
|           |                                    |     |                         |                         |                         |                         |                         |                    |                   |                    | 474                   | 1.280 | 0                              | 7                             | lw                |
|           |                                    |     |                         |                         |                         |                         |                         |                    |                   |                    | 380                   | 0.078 | 180                            | 25                            | sw                |
|           |                                    |     |                         |                         |                         |                         |                         |                    |                   |                    | 364                   | 0.105 | 180                            | 18                            | sw                |
|           |                                    |     |                         |                         |                         |                         |                         |                    |                   |                    | 472                   | 1.274 | 180                            | 5                             | lw                |
|           |                                    |     |                         |                         |                         |                         |                         |                    |                   |                    | 380                   | 0.067 | 0                              | 27                            | sw                |
|           |                                    |     |                         |                         |                         |                         |                         |                    |                   |                    | 365                   | 0.090 | 0                              | 13                            | sw                |
|           |                                    |     |                         |                         |                         |                         |                         |                    |                   |                    | 342                   | 0.126 | 180                            | 28                            | sw                |
| m         | 13.662                             | 1   | 116.7                   | 94.0                    | -20.8                   | -4.0                    | 24.7                    | 0                  | 170               | 90                 | 330                   | 0.031 | 0                              | 16                            | sw                |
|           |                                    |     |                         |                         |                         |                         |                         |                    |                   |                    | 322                   | 0.011 | 0                              | 67                            | sw                |
|           |                                    |     |                         |                         |                         |                         |                         |                    |                   |                    | 474                   | 1.280 | 0                              | 7                             | lw                |
|           |                                    |     |                         |                         |                         |                         |                         |                    |                   |                    | 380                   | 0.078 | 180                            | 25                            | sw                |
|           |                                    |     |                         |                         |                         |                         |                         |                    |                   |                    | 364                   | 0.105 | 180                            | 18                            | sw                |
|           |                                    |     |                         |                         |                         |                         |                         |                    |                   |                    | 472                   | 1.274 | 180                            | 5                             | lw                |
|           |                                    |     |                         |                         |                         |                         |                         |                    |                   |                    | 380                   | 0.067 | 0                              | 27                            | sw                |
|           |                                    |     |                         |                         |                         |                         |                         |                    |                   |                    | 365                   | 0.090 | 0                              | 13                            | sw                |
|           |                                    |     |                         |                         |                         |                         |                         |                    |                   |                    | 342                   | 0.126 | 180                            | 28                            | sw                |

| Structure | $E / \text{kJ mol}^{-1}$ <sup>a</sup> | $g$ | $T^{20} / \text{\AA}^2$ | $T^{22} / \text{\AA}^2$ | $Q_{xx} / \text{D \AA}$ | $Q_{yy} / \text{D \AA}$ | $Q_{zz} / \text{D \AA}$ | $\alpha' / ^\circ$ | $\beta' / ^\circ$ | $\gamma' / ^\circ$ | $\lambda / \text{nm}$ | $f$   | $\alpha_{\text{TDM}} / ^\circ$ | $\beta_{\text{TDM}} / ^\circ$ | band <sup>b</sup> |
|-----------|---------------------------------------|-----|-------------------------|-------------------------|-------------------------|-------------------------|-------------------------|--------------------|-------------------|--------------------|-----------------------|-------|--------------------------------|-------------------------------|-------------------|
| n         | 22.914                                | 1   | 118.8                   | 93.6                    | -21.0                   | -3.8                    | 24.7                    | 0                  | 176               | 90                 | 343                   | 0.112 | 0                              | 1                             | sw                |
|           |                                       |     |                         |                         |                         |                         |                         |                    |                   |                    | 330                   | 0.030 | 0                              | 45                            | sw                |
|           |                                       |     |                         |                         |                         |                         |                         |                    |                   |                    | 321                   | 0.020 | 180                            | 32                            | sw                |
|           |                                       |     |                         |                         |                         |                         |                         |                    |                   |                    | 468                   | 1.248 | 0                              | 8                             | lw                |
|           |                                       |     |                         |                         |                         |                         |                         |                    |                   |                    | 377                   | 0.086 | 180                            | 25                            | sw                |
|           |                                       |     |                         |                         |                         |                         |                         |                    |                   |                    | 358                   | 0.106 | 180                            | 15                            | sw                |
|           |                                       |     |                         |                         |                         |                         |                         |                    |                   |                    | 336                   | 0.145 | 0                              | 13                            | sw                |
|           |                                       |     |                         |                         |                         |                         |                         |                    |                   |                    | 323                   | 0.014 | 180                            | 9                             | sw                |
|           |                                       |     |                         |                         |                         |                         |                         |                    |                   |                    | 319                   | 0.057 | 180                            | 28                            | sw                |
| o         | 9.524                                 | 1   | 110.0                   | 96.0                    | -21.3                   | -2.1                    | 23.4                    | 180                | 164               | -90                | 472                   | 1.174 | 180                            | 0                             | lw                |
|           |                                       |     |                         |                         |                         |                         |                         |                    |                   |                    | 379                   | 0.051 | 0                              | 45                            | sw                |
|           |                                       |     |                         |                         |                         |                         |                         |                    |                   |                    | 359                   | 0.119 | 0                              | 8                             | sw                |
|           |                                       |     |                         |                         |                         |                         |                         |                    |                   |                    | 338                   | 0.157 | 180                            | 19                            | sw                |
|           |                                       |     |                         |                         |                         |                         |                         |                    |                   |                    | 324                   | 0.013 | 180                            | 5                             | sw                |
|           |                                       |     |                         |                         |                         |                         |                         |                    |                   |                    | 322                   | 0.037 | 180                            | 58                            | sw                |
|           |                                       |     |                         |                         |                         |                         |                         |                    |                   |                    | 476                   | 1.199 | 0                              | 2                             | lw                |
|           |                                       |     |                         |                         |                         |                         |                         |                    |                   |                    | 382                   | 0.036 | 180                            | 46                            | sw                |
|           |                                       |     |                         |                         |                         |                         |                         |                    |                   |                    | 365                   | 0.119 | 180                            | 6                             | sw                |
| p         | 0.269                                 | 1   | 108.1                   | 96.4                    | -20.4                   | 0.0                     | 20.4                    | 0                  | 169               | 90                 | 344                   | 0.141 | 0                              | 37                            | sw                |
|           |                                       |     |                         |                         |                         |                         |                         |                    |                   |                    | 331                   | 0.024 | 180                            | 17                            | sw                |
|           |                                       |     |                         |                         |                         |                         |                         |                    |                   |                    | 325                   | 0.008 | 0                              | 88                            | sw                |

<sup>a</sup> relative to lowest energy conformer as calculated for the isolated molecules by DFT; <sup>b</sup> only listed where multiple bands are present in experimental spectra.

The influence of the choice of origin on the calculated quadrupoles in the molecules exhibiting permanent dipoles was tested for dye **10**, which has the largest calculated quadrupole moment, and for dye **11**. Molecular quadrupoles were calculated from the centre of mass and after translation by  $\pm 1 \text{ \AA}$  and  $\pm 2 \text{ \AA}$  in the  $x$ ,  $y$  and  $z$  axes defined as the principal moment of inertia axes. The dichroic order parameters that were calculated using these different quadrupole origins varied from those calculated using the centre-of-mass origin by less than the range of experimental values given in Table S1 for each of these dyes.

## 5. Calculated structure, quadrupole tensor and surface tensor of 5CB

5cb

|   |           |           |           |
|---|-----------|-----------|-----------|
| C | -1.822298 | 0.624005  | 0.642108  |
| C | -1.107737 | 1.402525  | -0.268583 |
| C | 0.256660  | 1.230615  | -0.446203 |
| C | 0.958658  | 0.265165  | 0.280926  |
| C | 0.244117  | -0.517206 | 1.192648  |
| C | -1.119331 | -0.337081 | 1.369334  |
| C | 2.411256  | 0.081981  | 0.095305  |
| C | 2.983102  | -1.195548 | 0.110116  |
| C | 4.344082  | -1.372886 | -0.065066 |
| C | 5.172501  | -0.264426 | -0.262326 |
| C | 4.616250  | 1.017833  | -0.279475 |
| C | 3.254082  | 1.182039  | -0.101697 |
| C | 6.576170  | -0.440642 | -0.444590 |
| N | 7.712502  | -0.583360 | -0.592213 |
| C | -3.307704 | 0.786140  | 0.803679  |
| C | -4.108407 | -0.122228 | -0.133913 |
| C | -5.614764 | 0.038698  | 0.021597  |
| C | -6.419447 | -0.862658 | -0.907079 |
| C | -7.923866 | -0.694751 | -0.747053 |
| H | 4.773782  | -2.368005 | -0.060725 |
| H | 5.259723  | 1.878297  | -0.422467 |
| H | 2.836252  | 2.182844  | -0.090244 |
| H | 2.345265  | -2.063769 | 0.235640  |
| H | 0.768735  | -1.252573 | 1.794509  |
| H | 0.781612  | 1.837878  | -1.176867 |
| H | -1.647649 | -0.946286 | 2.097503  |
| H | -1.630660 | 2.156119  | -0.850892 |
| H | -3.584790 | 1.830033  | 0.616456  |
| H | -3.589209 | 0.569993  | 1.840852  |
| H | -3.818683 | 0.088785  | -1.171075 |
| H | -3.826392 | -1.166363 | 0.051812  |
| H | -5.897979 | -0.168880 | 1.062569  |
| H | -5.890197 | 1.086132  | -0.162667 |
| H | -6.134481 | -0.655166 | -1.946169 |
| H | -6.144024 | -1.908443 | -0.721483 |
| H | -8.475786 | -1.352690 | -1.423955 |
| H | -8.241288 | -0.927979 | 0.274516  |
| H | -8.231686 | 0.334130  | -0.960194 |

$$Q_{xx} = 23.729 \text{ D } \text{\AA}$$

$$Q_{yy} = 10.080 \text{ D } \text{\AA}$$

$$Q_{zz} = -33.809 \text{ D } \text{\AA}$$

$$\alpha = -132.317^\circ$$

$$\beta = 7.238^\circ$$

$$\gamma = 127.500^\circ$$

$$T^{20} = 89.7 \text{ \AA}^2$$

$$T^{22} = 22.6 \text{ \AA}^2$$

## 6. Calculated dichroic order parameters using a range of scaling factors for $F_{ZZ}$

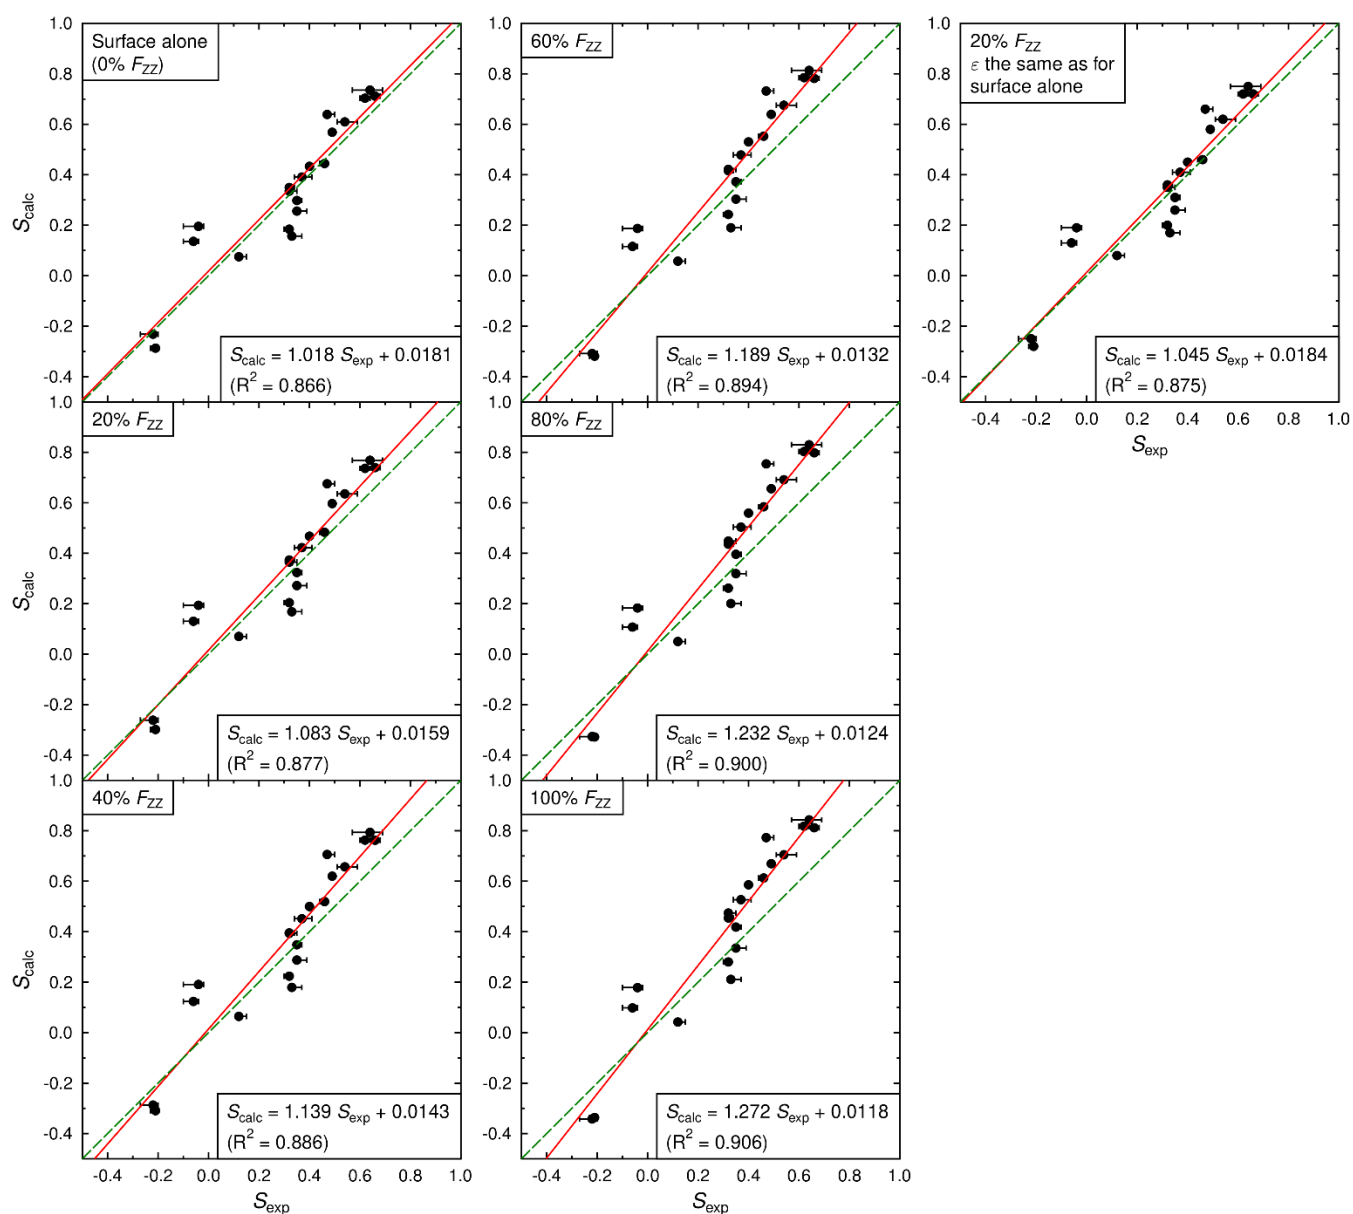

**Figure S2.** Plots of dichroic order parameters calculated using the surface tensor alone and the combined surface tensor and quadrupole model against experimental values for a range of  $F_{ZZ}$  scaling factors, along with linear fits to the data; bars correspond to the maximum and minimum experimental values given in Table S1. The dashed green line corresponds to  $S_{\text{calc}} = S_{\text{exp}}$ . Also shown (top right) is an equivalent plot for an  $F_{ZZ}$  scaling factor of 20% but where the orienting strength for the surface tensor component ( $\epsilon$ ) was not refitted for the combined surface and quadrupole model.
